# Supplementary material for: Gold(I)-catalysed one-pot synthesis of chromans using allylic alcohols and phenols
Source: publisher site journal article supplement (doi:10.3762/bjoc.9.209), 2013-09-04
Supplement: Additional file 1 [file 1860-5397-9-209-S1.pdf]

**Supporting Information**  
**for**  
**Gold(I)-catalysed one-pot synthesis of chromans using allylic  
alcohols and phenols**

Eloi Coutant, Paul C. Young, Graeme Barker, Ai-Lan Lee\*

Address: Institute of Chemical Sciences, Heriot-Watt University, Edinburgh, EH14 1LP,  
United Kingdom

Email: Ai-Lan Lee - [A.Lee@hw.ac.uk](mailto:A.Lee@hw.ac.uk)

\*Corresponding author

**Full experimental procedures, characterisation for all new compounds and  
copies of  $^1\text{H}$  and  $^{13}\text{C}$  NMR spectra**

## Contents

|                                                                                                    |    |
|----------------------------------------------------------------------------------------------------|----|
| General experimental section                                                                       | S3 |
| Procedure, characterisation, $^1\text{H}$ and $^{13}\text{C}$ NMR spectra of synthesised compounds | S4 |

## General experimental section

$^1\text{H}$  NMR spectra were recorded on Bruker AV 300 and AV 400 spectrometers at 300 and 400 MHz respectively.  $^{13}\text{C}$  NMR spectra were recorded using the same spectrometers at 75 and 100 MHz respectively. Chemical shifts ( $\delta$  in ppm) were referenced to tetramethylsilane (TMS) or to residual solvent peaks ( $\text{CDCl}_3$  at  $\delta_{\text{H}}$  7.26).  $J$  values are given in Hz and s, d, dd, t, q, qn and m abbreviations correspond to singlet, doublet, doublet of doublet, triplet, quartet, quintet and multiplet. Mass spectra were obtained at the EPSRC National Mass Spectrometry Service Centre in Swansea. Infrared spectra were obtained on Perkin-Elmer Spectrum 100 FTIR Universal ATR Sampling Accessory, deposited neat or as a chloroform solution to a diamond/ZnSe plate. Flash column chromatography was carried out using Matrix silica gel 60 from Fisher Chemicals and TLC was performed using Merck silica gel 60 F<sub>254</sub> precoated sheets and visualised by UV (254 nm) or stained by the use of aqueous acidic  $\text{KMnO}_4$  or aqueous acidic ceric ammonium molybdate or iodine as appropriate. Petrol ether refers to petroleum ether (40–60 °C). Solvents were purchased from Fisher and used without further purification unless otherwise stated.

Gold catalysts were purchased from Sigma-Aldrich and used without further purification. All phenols **5** were purchased from Sigma-Aldrich or Fisher and used without further purification. Allylic alcohol **13** and **19** were purchased from Sigma-Aldrich. All other allylic alcohol substrates were prepared following known literature procedures. Allylic alcohols **4**, **7**, **12–15** were obtained following known literature procedure with Grignard addition to ketones/aldehydes [1,2]. **16**, **17**, **18** were prepared by  $n$ -BuLi addition to the corresponding enone [3]. **20** was prepared from reduction of the corresponding enone [4].

The gold(I)-catalysed reactions were carried out in 1 dram screw cap vials without the need for dry solvents or inert atmosphere, unless stated otherwise.

## 2,2-Dicyclohexylchroman (**8a**)

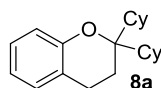

1,1-Dicyclohexylprop-2-en-1-ol (**7**, 20.5 mg, 92.2  $\mu\text{mol}$ ) and phenol **5a** (42.8 mg, 455  $\mu\text{mol}$ ) were dissolved in toluene (0.19 mL).  $\text{PPh}_3\text{AuNTf}_2$  (as the 2:1 toluene adduct) (3.4 mg, 4.6  $\mu\text{mol}$ ) was added to the resulting solution. The reaction was allowed to stir at 50 °C for 19 hours. The reaction was then filtered over a plug of silica, using diethyl ether as eluent. The crude mixture was purified using column chromatography, using a gradient eluent system of neat hexane to 20:1 hexane:diethyl ether. Product **8a** was obtained as a colourless film (17.7 mg, 59.3  $\mu\text{mol}$ , 64%).

$\nu_{\text{max}}/\text{cm}^{-1}$  2923, 2852, 1582, 1488, 1452, 1255, 1242, 987, 907, 751, 731.

$\delta_{\text{H}}$  (300 MHz,  $\text{CDCl}_3$ ) 7.11–6.98 (2H, m, Ar-H), 6.81 - 6.74 (2H, m, Ar-H), 2.67 (2H, t,  $J$  6.7 Hz, CH<sub>2</sub>), 1.87 (2H, t,  $J$  6.7 Hz, CH<sub>2</sub>), 1.95–1.57 (12H, m, Cy-H), 1.31–1.03 (10H, m, Cy-H).

$\delta_{\text{C}}$  (75 MHz,  $\text{CDCl}_3$ ) 154.8 (C), 129.1 (CH), 127.3 (CH), 122.2 (C), 119.1 (CH), 117.2 (CH), 82.0 (C), 44.3 (CH), 28.3 (CH<sub>2</sub>), 27.8 (CH<sub>2</sub>), 27.5 (CH<sub>2</sub>), 27.2 (CH<sub>2</sub>), 27.0 (CH<sub>2</sub>), 23.0 (CH<sub>2</sub>), 22.2 (CH<sub>2</sub>).

Found (APCI<sup>+</sup>)  $[\text{M} + \text{H}]^+$  299.2369,  $\text{C}_{21}\text{H}_{31}\text{O}$  requires 299.2369.

elchb002  
1H 300.1MHz Job 22818 Coutant Eloi B002 CDCl3 25.1°C  
Isolated dicyclohexyl chroman

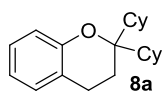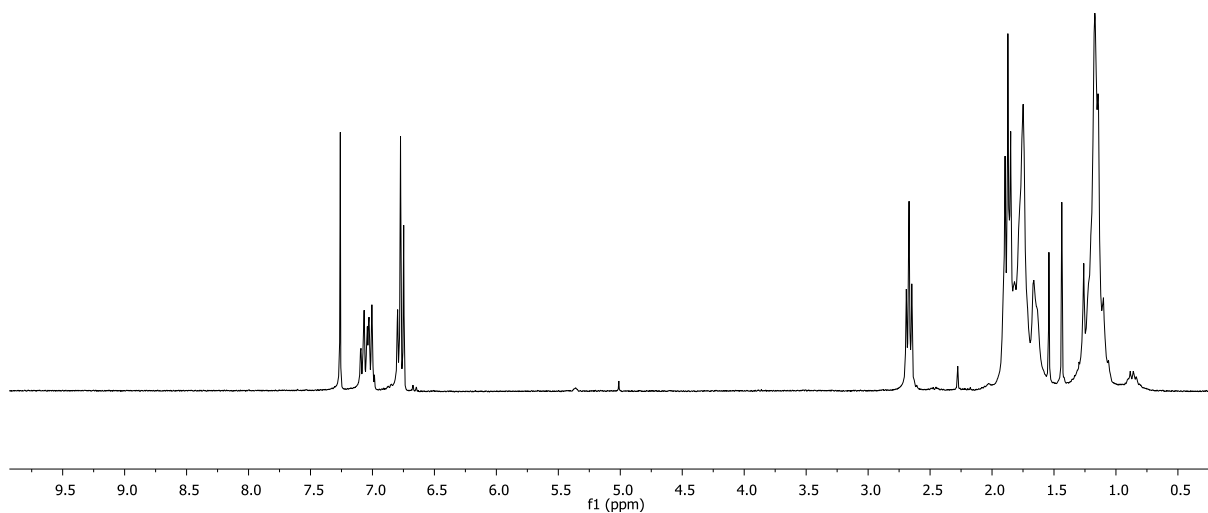

elccc002.1.fid  
13C 75.5MHz Job 22846 Coutant Eloi C002 CDCl3 25.1°C 3 hours 1 min  
Dicyclohexyl chroman, dried

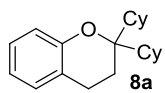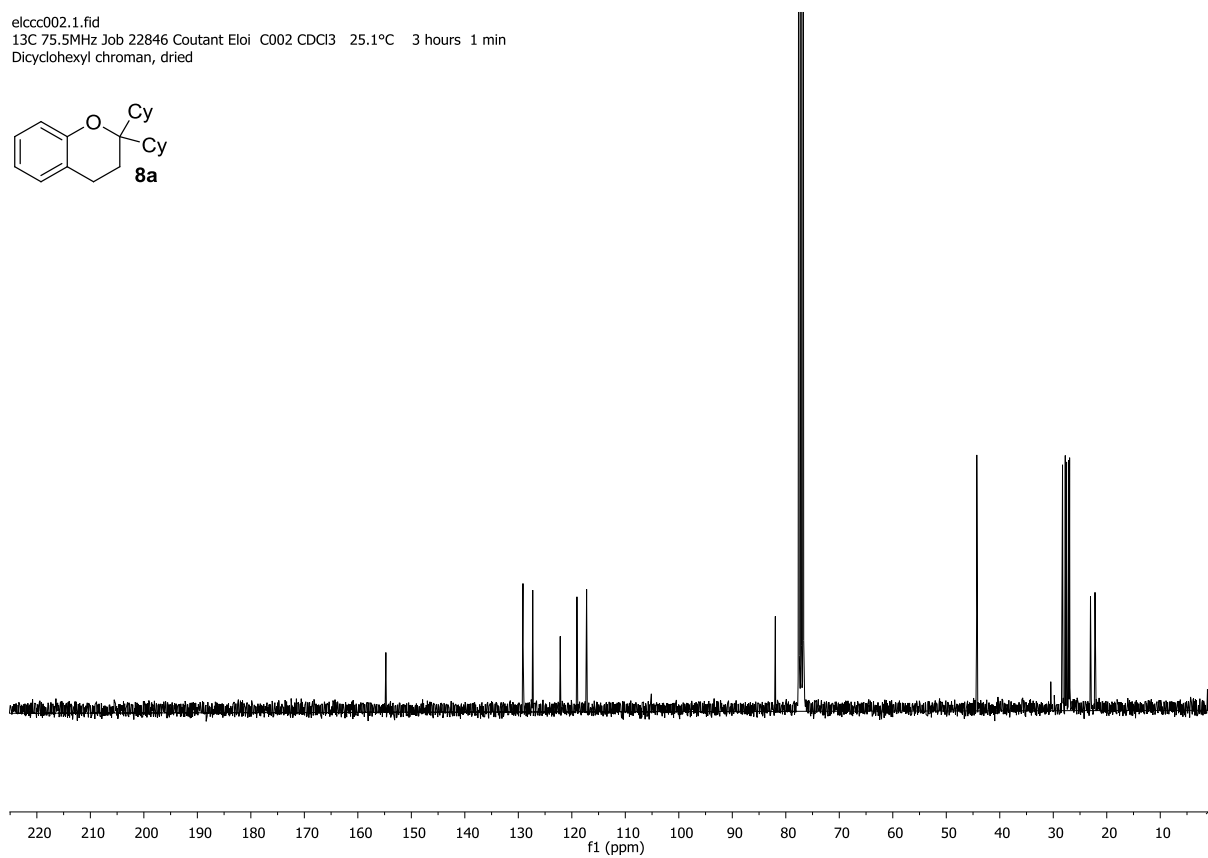

## 2,2-Dicyclohexyl-6-methylchroman (**8b**)

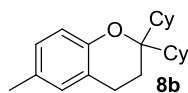

1,1-Dicyclohexylprop-2-en-1-ol (**7**, 15.5 mg, 69.7  $\mu\text{mol}$ ) and *p*-cresol (**5b**, 37.3 mg, 345  $\mu\text{mol}$ ) were dissolved in toluene (0.14 mL).  $\text{PPh}_3\text{AuNTf}_2$  (as the 2:1 toluene adduct) (2.6 mg, 3.5  $\mu\text{mol}$ ) was added to the resulting solution. The reaction was allowed to stir at 60 °C for 18 hours. The reaction was then filtered over a plug of silica, using diethyl ether as eluent. The crude mixture was purified using column chromatography, using a gradient eluent system of neat hexane to 9:1 hexane:diethyl ether. Product **8b** was obtained as a white solid (12.4 mg, 39.7  $\mu\text{mol}$ , 57%).

Mp: 99–103 °C.

$\nu_{\text{max}}/\text{cm}^{-1}$  2921, 2851, 1497, 1448, 1302, 1255, 1243, 1217, 1142, 987, 946, 894, 877, 811, 756.

$\delta_{\text{H}}$  (300 MHz,  $\text{CDCl}_3$ ) 6.90–6.82 (2H, m, Ar-H), 6.67 (1H, d,  $J$  8.2 Hz, Ar-H), 2.63 (2H, t,  $J$  6.7 Hz,  $\text{CH}_2$ ), 2.25 (3H, s,  $\text{CH}_3$ ), 1.85 (2H, t,  $J$  6.7 Hz,  $\text{CH}_2$ ), 1.93–1.58 (12H, m, Cy-H), 1.40–1.00 (10H, m, Cy-H).

$\delta_{\text{C}}$  (75 MHz,  $\text{CDCl}_3$ ) 152.5 (C), 129.5 (CH), 128.1 (C), 128.0 (CH), 121.8 (C), 117.0 (CH), 81.7 (C), 44.3 (CH), 28.3 ( $\text{CH}_2$ ), 27.8 ( $\text{CH}_2$ ), 27.5 ( $\text{CH}_2$ ), 27.2 ( $\text{CH}_2$ ), 27.0 ( $\text{CH}_2$ ), 23.1 ( $\text{CH}_2$ ), 22.2 ( $\text{CH}_2$ ), 20.7 ( $\text{CH}_3$ ).

Found (APCI<sup>+</sup>)  $[\text{M} + \text{H}]^+$  313.2526,  $\text{C}_{22}\text{H}_{33}\text{O}$  requires 313.2526.

elchb023a  
 1H 300.1MHz Job 24033 Coutant Eloi B023A CDCl3 25.1°C  
 A fraction - DiCyAA + p-Cresol, 50C, over week-end

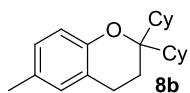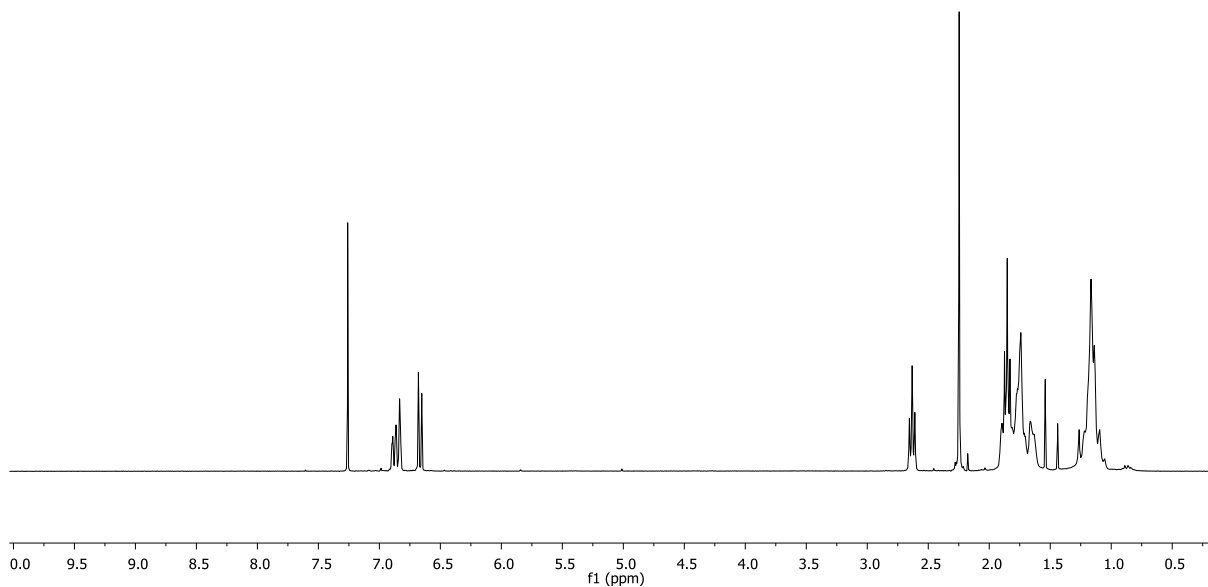

elccb023a  
 13C 75.5MHz Job 24072 Coutant Eloi B023A CDCl3 25.0°C 3 hours 1 min  
 A fraction - DiCyAA + p-Cresol, 50C, over week-end

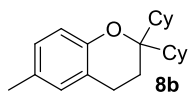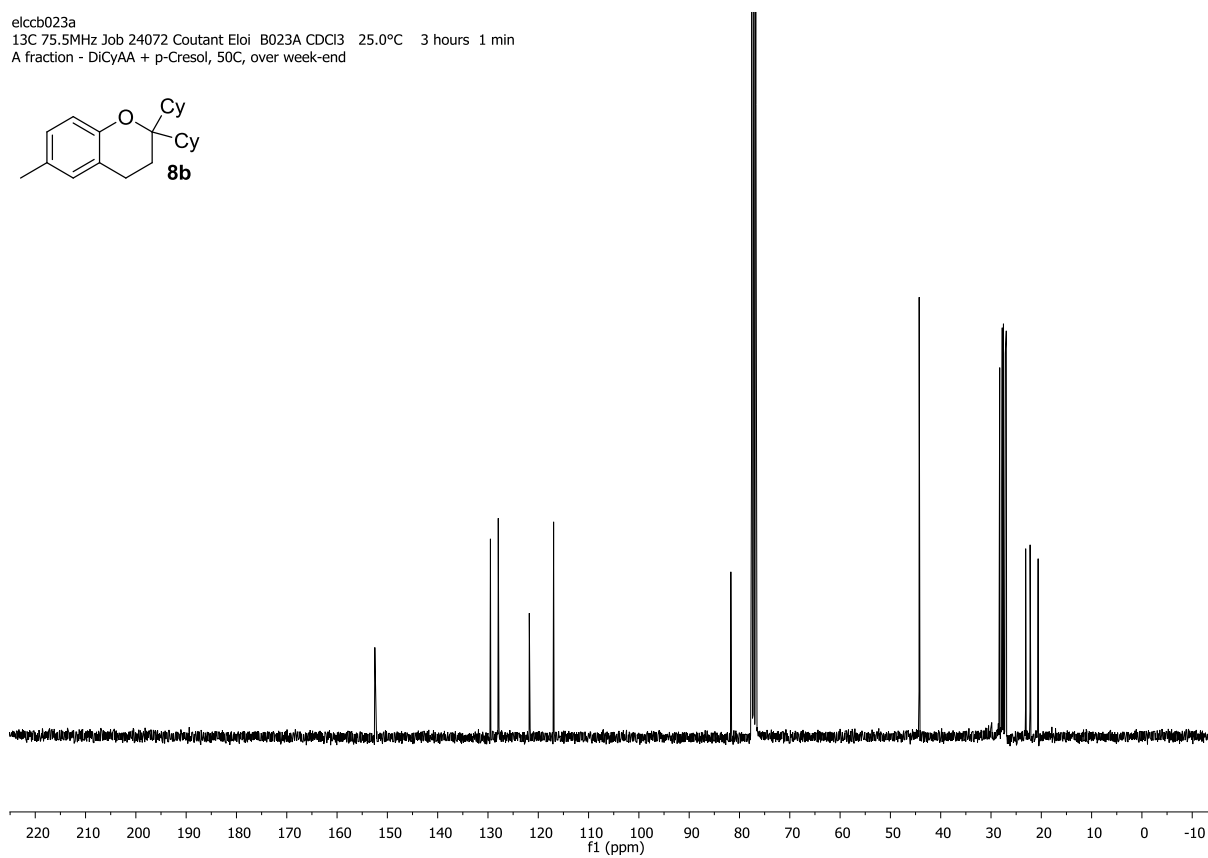

## 2,2-Dicyclohexyl-5-methylchroman and 2,2-dicyclohexyl-7-methylchroman (**8c** and **8c'**)

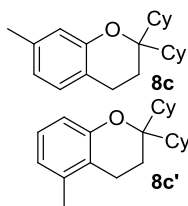

1,1-Dicyclohexylprop-2-en-1-ol (**7**, 15.2 mg, 68.4  $\mu\text{mol}$ ) and *m*-cresol (**5c**, 14  $\mu\text{L}$ , 125.2  $\mu\text{mol}$ ) were dissolved in toluene (0.14 mL).  $\text{PPh}_3\text{AuNTf}_2$  (as the 2:1 toluene adduct) (2.5 mg, 3.4  $\mu\text{mol}$ ) was added to the resulting solution. The reaction was allowed to stir at 60°C for 17 hours. The reaction was then filtered over a plug of silica, using diethyl ether as eluent. 2,2-Dicyclohexyl-5-methylchroman **8c** and 2,2-dicyclohexyl-7-methylchroman **8c'** were isolated as a mixture of inseparable isomers by column chromatography, using a gradient eluent system of neat hexane to 9:1 hexane:diethyl ether. Product **8c** and **8c'** (approximately 1:1 mixture) were obtained as an off-white oil (15.1 mg, 48.3  $\mu\text{mol}$ , 71%).

$\nu_{\text{max}}/\text{cm}^{-1}$  2922, 2852, 1466, 1449, 1265, 1247, 1215, 1083, 1063, 1051, 753.

$\delta_{\text{H}}$  (300 MHz,  $\text{CDCl}_3$ ) 6.99 (1H, t, *J* 8.0 Hz, Ar-H), 6.91 (1H, d, *J* 8.0 Hz, Ar-H), 6.70–6.55 (4H, m, Ar-H), 2.63 (2H, t, *J* 6.7 Hz,  $\text{CH}_2$ ), 2.53 (2H, t, *J* 6.7 Hz,  $\text{CH}_2$ ), 2.26 (3H, s,  $\text{CH}_3$ ), 2.22 (3H, s,  $\text{CH}_3$ ), 1.88 (2H, t, *J* 6.7 Hz,  $\text{CH}_2$ ), 1.93–1.57 (24H, m, Cy-H), 1.85 (2H, d, *J* 6.7 Hz,  $\text{CH}_2$ ), 1.29–1.03 (20H, m, Cy-H).

$\delta_{\text{C}}$  (75 MHz,  $\text{CDCl}_3$ ) 154.45 (C), 154.42 (C), 137.1 (C), 136.8 (C), 128.9 (CH), 126.7 (CH), 120.7 (C), 120.5 (CH), 120.0 (CH), 119.0 (C), 117.6 (CH), 115.1 (CH), 81.8 (C), 81.0 (C), 44.2 (CH), 43.9 (CH), 28.31 ( $\text{CH}_2$ ), 28.29 ( $\text{CH}_2$ ), 27.7 ( $\text{CH}_2$ ), 27.5 ( $\text{CH}_2$ ), 27.14 ( $\text{CH}_2$ ), 27.12 ( $\text{CH}_2$ ), 27.0 ( $\text{CH}_2$ ), 23.0 ( $\text{CH}_2$ ), 22.8 ( $\text{CH}_2$ ), 21.8 ( $\text{CH}_2$ ), 21.3 ( $\text{CH}_3$ ), 19.7 ( $\text{CH}_2$ ), 19.3 ( $\text{CH}_3$ ).

Found (APCI<sup>+</sup>)  $[\text{M} + \text{H}]^+$  313.2524,  $\text{C}_{22}\text{H}_{33}\text{O}$  requires 313.2526.



elchb043b  
 1H 300.1MHz Job 25303 Coutant Eloi B043B CDCl3 18.7°C  
 B fraction - DiCyAA + 2eq m-Cresol, 60C, o/n

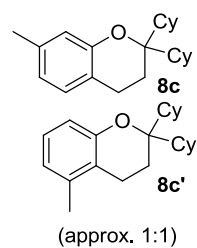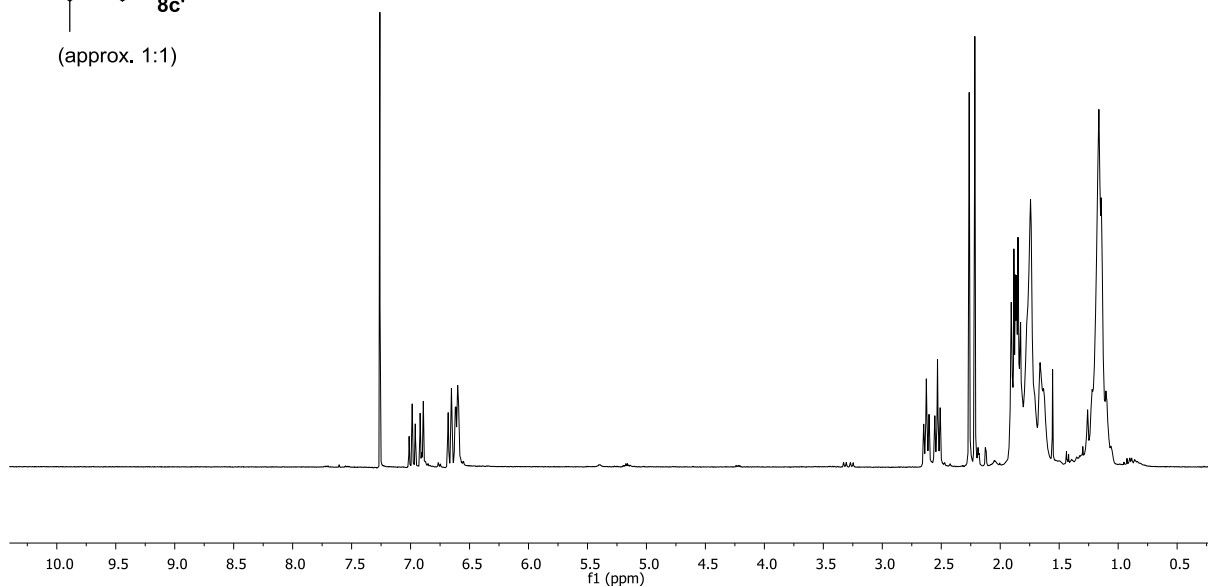

elccb043b  
 13C 75.5MHz Job 25331 Coutant Eloi B043B CDCl3 19.3°C 3 hours 1 min  
 Mixture of 2 chromans - DiCyAA + 2eq m-Cresol, 60C, o/n

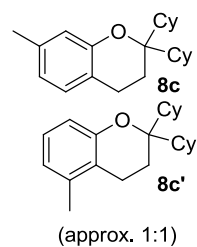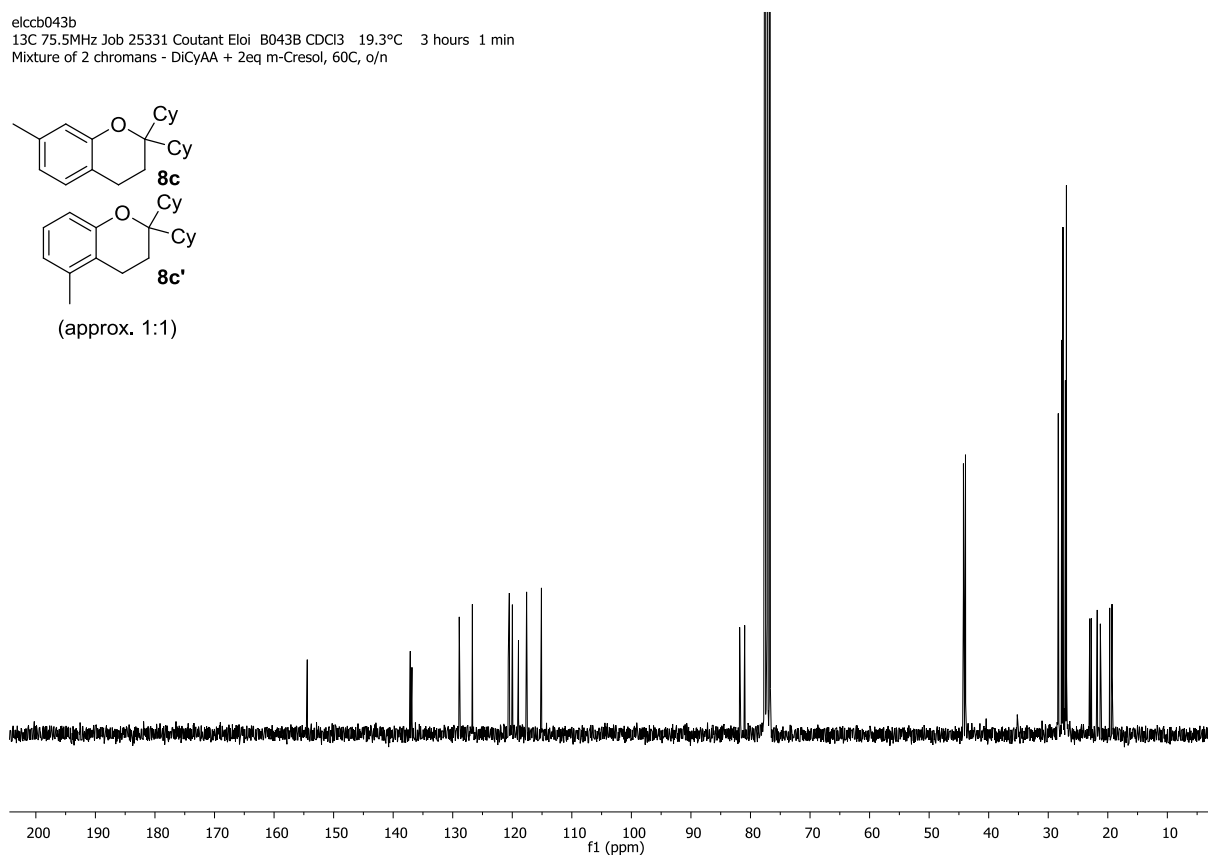

## 2,2-Dicyclohexyl-8-methylchroman (**8d**)

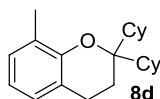

1,1-Dicyclohexylprop-2-en-1-ol (**7**, 15.1 mg, 67.9  $\mu\text{mol}$ ) and *o*-Cresol (**5d**, 36.6 mg, 338  $\mu\text{mol}$ ) were dissolved in toluene (0.14 mL).  $\text{PPh}_3\text{AuNTf}_2$  (as the 2:1 toluene adduct) (2.7 mg, 3.7  $\mu\text{mol}$ ) was added to the resulting solution. The reaction was allowed to stir at 60  $^\circ\text{C}$  for 18 hours. The reaction was then filtered over a plug of silica, using diethyl ether as eluent. The crude mixture was purified using column chromatography, using a gradient eluent system of neat hexane to 9:1 hexane:diethyl ether. Product **8d** was obtained as a pink oil (14.7 mg, 47.0  $\mu\text{mol}$ , 69%).

$\nu_{\text{max}}/\text{cm}^{-1}$  2924, 2853, 1467, 1449, 1263, 1216, 1263, 1216, 1084, 987, 943, 907, 754, 731.

$\delta_{\text{H}}$  (300 MHz,  $\text{CDCl}_3$ ) 6.94 (1H, d,  $J$  7.4 Hz, Ar-H), 6.87 (1H, d,  $J$  7.4 Hz, Ar-H), 6.69 (1H, t,  $J$  7.4 Hz, Ar-H), 2.66 (2H, t,  $J$  6.7 Hz,  $\text{CH}_2$ ), 2.17 (3H, s,  $\text{CH}_3$ ), 1.92–1.50 (12H, m, Cy-H), 1.87 (2H, t,  $J$  6.7 Hz,  $\text{CH}_2$ ), 1.32–1.02 (10H, m, Cy-H).

$\delta_{\text{C}}$  (75 MHz,  $\text{CDCl}_3$ ) 152.6 (C), 128.3 (CH), 126.7 (CH), 126.2 (C), 121.3 (C), 118.4 (CH), 81.8 (C), 44.3 (CH), 28.3 ( $\text{CH}_2$ ), 27.9 ( $\text{CH}_2$ ), 27.6 ( $\text{CH}_2$ ), 27.2 ( $\text{CH}_2$ ), 27.0 ( $\text{CH}_2$ ), 23.3 ( $\text{CH}_2$ ), 22.3 ( $\text{CH}_2$ ), 16.31 ( $\text{CH}_3$ ).

Found (APCI $^+$ )  $[\text{M} + \text{H}]^+$  313.2527,  $\text{C}_{22}\text{H}_{33}\text{O}$  requires 313.2526.

elcha039a  
 1H 300.1MHz Job 25020 Coutant Eloi A039A CDCl3 25.0°C  
 A fraction - DiCyAA + 5eq o-Cresol, 60°C, o/n

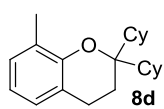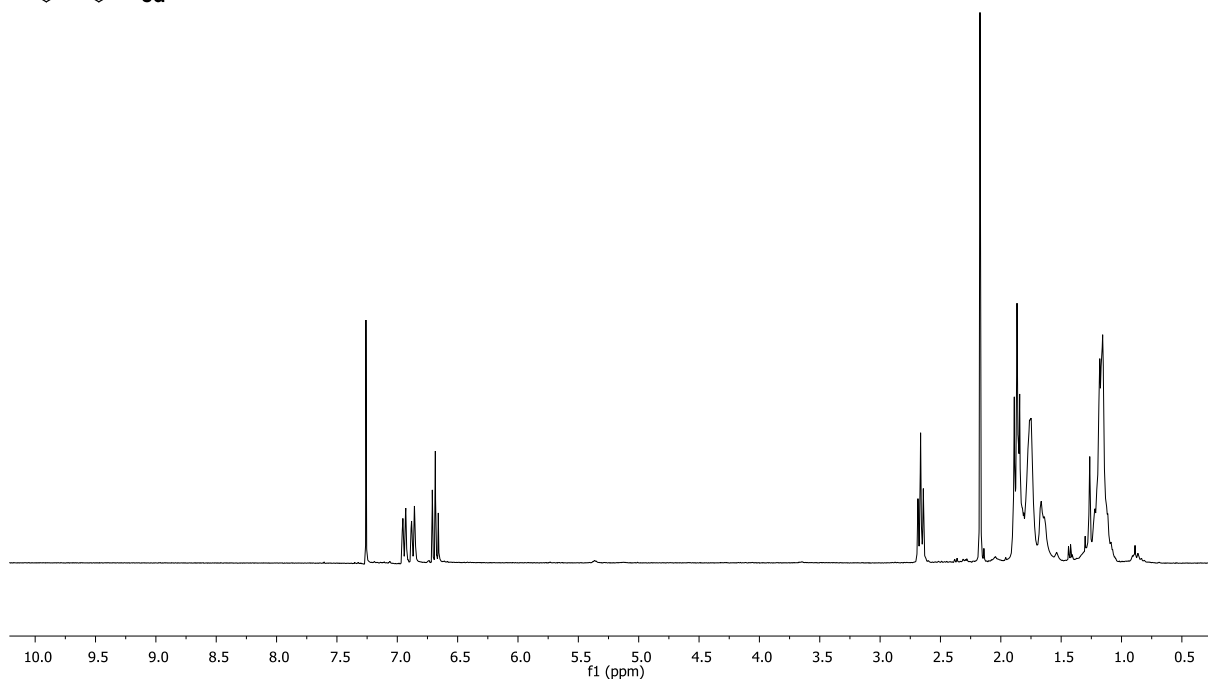

elccc039a  
 13C 75.5MHz Job 25152 Coutant Eloi C039A CDCl3 21.5°C 3 hours 1 min  
 2,2-dicyclohexyl-8-methylchroman

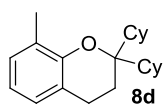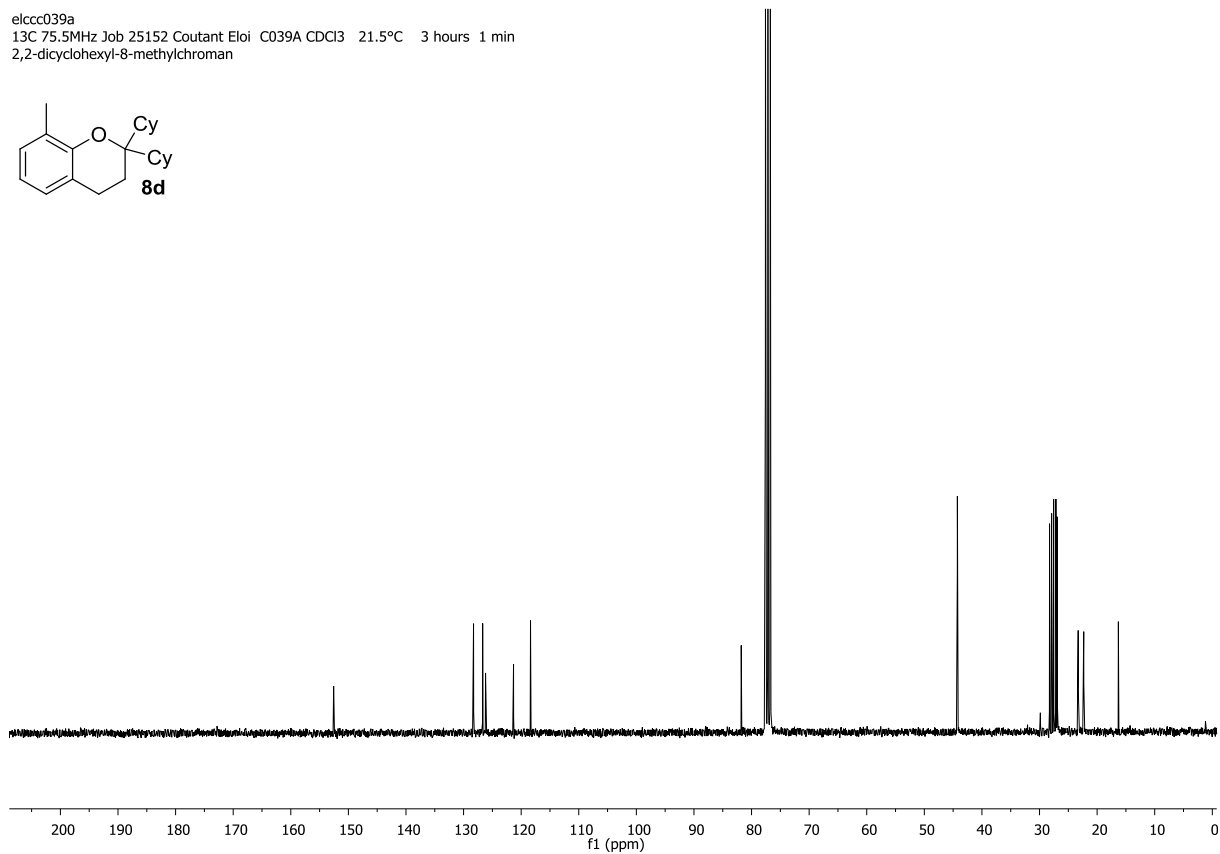

## 2,2-Dicyclohexyl-5,7-dimethylchroman (**8e**)

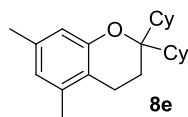

1,1-Dicyclohexylprop-2-en-1-ol (**7**, 15.0 mg, 67.5  $\mu\text{mol}$ ) and 3,5-dimethylphenol (**5e**, 41.2 mg, 337  $\mu\text{mol}$ ) were dissolved in toluene (0.14 mL).  $\text{PPh}_3\text{AuNTf}_2$  (as the 2:1 toluene adduct) (2.6 mg, 3.5  $\mu\text{mol}$ ) was added to the resulting solution. The reaction was allowed to stir at 60 °C for 17 hours. The reaction was then filtered over a plug of silica, using diethyl ether as eluent. The crude mixture was purified using column chromatography, using a gradient eluent system of neat hexane to 9:1 hexane:diethyl ether. Product **8e** was obtained as a pink oil (13.8 mg, 42.3  $\mu\text{mol}$ , 63%).

$\nu_{\text{max}}/\text{cm}^{-1}$  2922, 2852, 1578, 1449, 1316, 1301, 1140, 1083, 1070, 836, 755.

$\delta_{\text{H}}$  (300 MHz,  $\text{CDCl}_3$ ) 6.51 (1H, s, Ar-H), 6.48 (1H, s, Ar-H), 2.50 (2H, t,  $J$  6.7 Hz,  $\text{CH}_2$ ), 2.23 (3H, s,  $\text{CH}_3$ ), 2.18 (3H, s,  $\text{CH}_3$ ), 1.87 (2H, t,  $J$  6.7 Hz,  $\text{CH}_2$ ), 1.94–1.50 (12H, m, Cy-H), 1.31–1.00 (10H, m, Cy-H).

$\delta_{\text{C}}$  (75 MHz,  $\text{CDCl}_3$ ) 154.3 (C), 136.6 (C), 136.5 (C), 121.6 (CH), 117.5 (C), 115.4 (CH), 80.9 (C), 44.0 (CH), 28.4 ( $\text{CH}_2$ ), 27.8 ( $\text{CH}_2$ ), 27.6 ( $\text{CH}_2$ ), 27.2 ( $\text{CH}_2$ ), 27.0 ( $\text{CH}_2$ ), 22.9 ( $\text{CH}_2$ ), 21.1 ( $\text{CH}_3$ ), 19.4 ( $\text{CH}_2$ ), 19.2 ( $\text{CH}_3$ ).

Found (APCI<sup>+</sup>)  $[\text{M} + \text{H}]^+$  327.2684,  $\text{C}_{23}\text{H}_{35}\text{O}$  requires 327.2682.

elchb031a  
 1H 300.1MHz Job 24599 Coutant Eloi B031A CDCl3 25.1°C  
 A fraction - DiCyAA + 5eq m,m-DiMePhenol, 60C, o/n

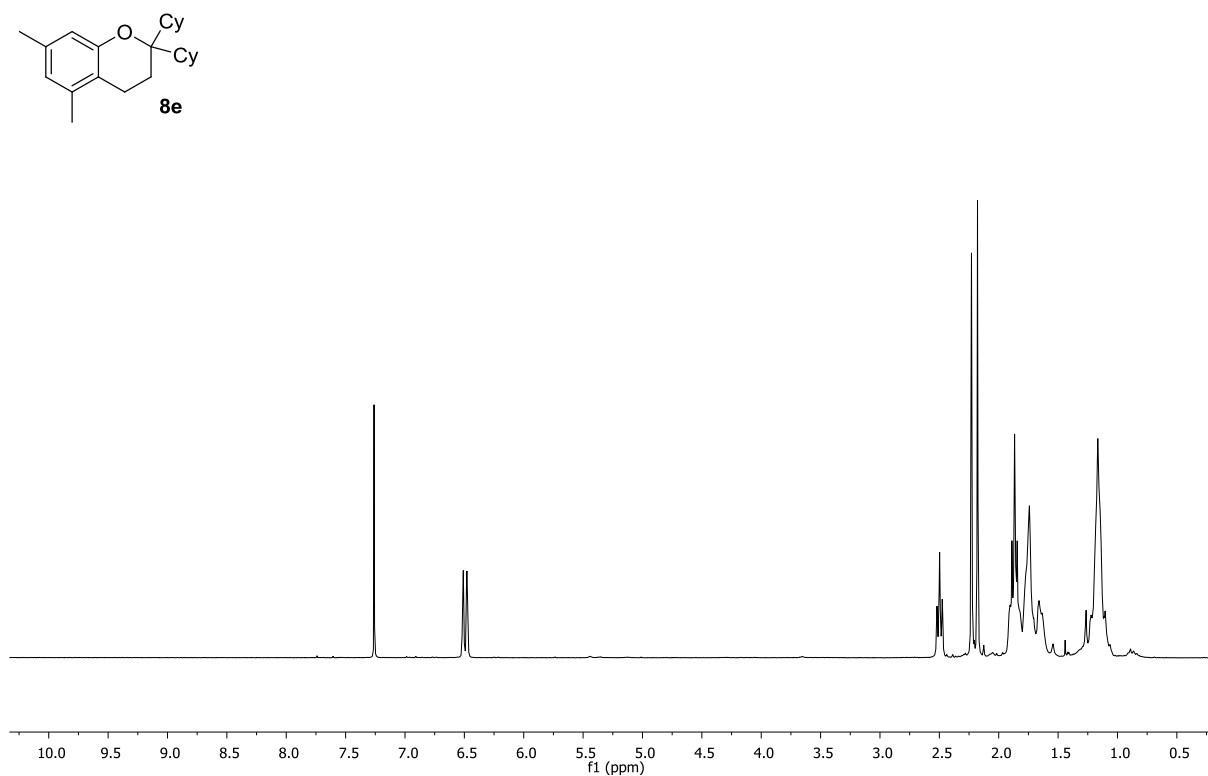

elccb031a  
 13C 75.5MHz Job 24612 Coutant Eloi B031A CDCl3 25.0°C 3 hours 1 min  
 A fraction - DiCyAA + 5eq m,m-DiMePhenol, 60C, o/n

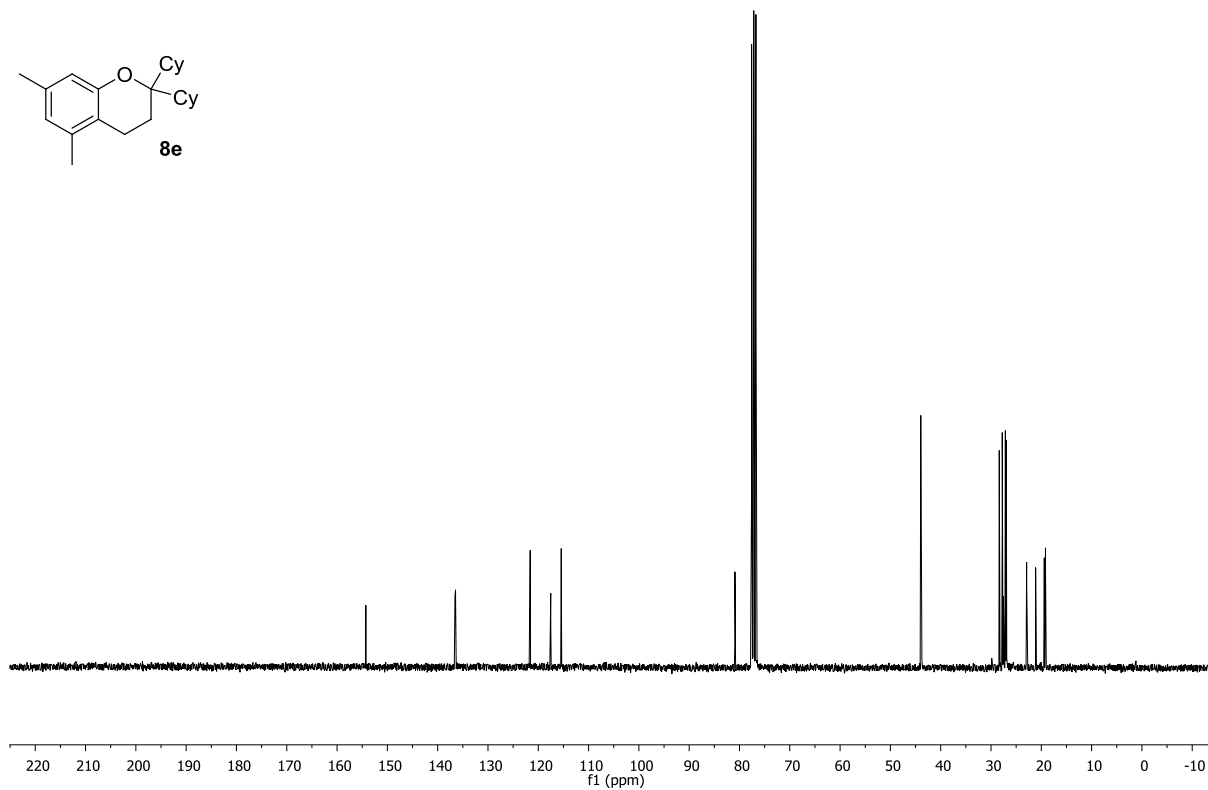

## 2,2-Dicyclohexyl-6-methoxychroman (**8f**)

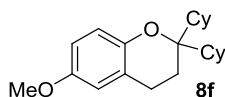

1,1-Dicyclohexylprop-2-en-1-ol (**7**, 15.1 mg, 67.9  $\mu\text{mol}$ ) and 4-methoxyphenol (**5f**, 17.0 mg, 137  $\mu\text{mol}$ ) were dissolved in toluene (0.14 mL).  $\text{PPh}_3\text{AuNTf}_2$  (as the 2:1 toluene adduct) (2.5 mg, 3.4  $\mu\text{mol}$ ) was added to the resulting solution. The reaction was allowed to stir at 60  $^\circ\text{C}$  for 17 hours. The reaction was then filtered over a plug of silica, using diethyl ether as eluent. The crude mixture was purified using column chromatography, using a gradient eluent system of neat hexane to 9:1 hexane:diethyl ether. Product **8f** was obtained as a yellow solid (15.9 mg, 48.4  $\mu\text{mol}$ , 71%).

Mp: 95-99  $^\circ\text{C}$ .

$\nu_{\text{max}}/\text{cm}^{-1}$  2924, 2852, 1495, 1449, 1235, 1216, 1148, 1047, 895.

$\delta_{\text{H}}$  (300 MHz,  $\text{CDCl}_3$ ) 6.69–6.65 (2H, m, Ar-H), 6.59–6.56 (1H, m, Ar-H), 3.74 (3H, s, O-CH<sub>3</sub>), 2.65 (2H, t,  $J$  6.7 Hz, CH<sub>2</sub>), 1.85 (2H, t,  $J$  6.7 Hz, CH<sub>2</sub>), 1.93–1.57 (12H, m, Cy-H), 1.28–1.01 (10H, m, Cy-H).

$\delta_{\text{C}}$  (75 MHz,  $\text{CDCl}_3$ ) 152.5 (C), 148.7 (C), 122.7 (C), 117.7 (CH), 113.8 (CH), 113.3 (CH), 81.6 (C), 55.8 (CH<sub>3</sub>), 44.2 (CH), 28.3 (CH<sub>2</sub>), 27.8 (CH<sub>2</sub>), 27.5 (CH<sub>2</sub>), 27.2 (CH<sub>2</sub>), 26.9 (CH<sub>2</sub>), 23.1 (CH<sub>2</sub>), 22.6 (CH<sub>2</sub>).

Found (APCI<sup>+</sup>)  $[\text{M} + \text{H}]^+$  329.2475,  $\text{C}_{22}\text{H}_{33}\text{O}_2$  requires 329.2476.

elchb041a  
 1H 300.1MHz Job 25122 Coutant Eloi B041A CDCl3 25.0°C  
 100-75:1 fraction - DiCyAA + 5eq p-methoxyphenol, 60°C, o/n

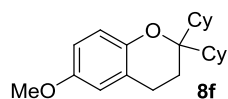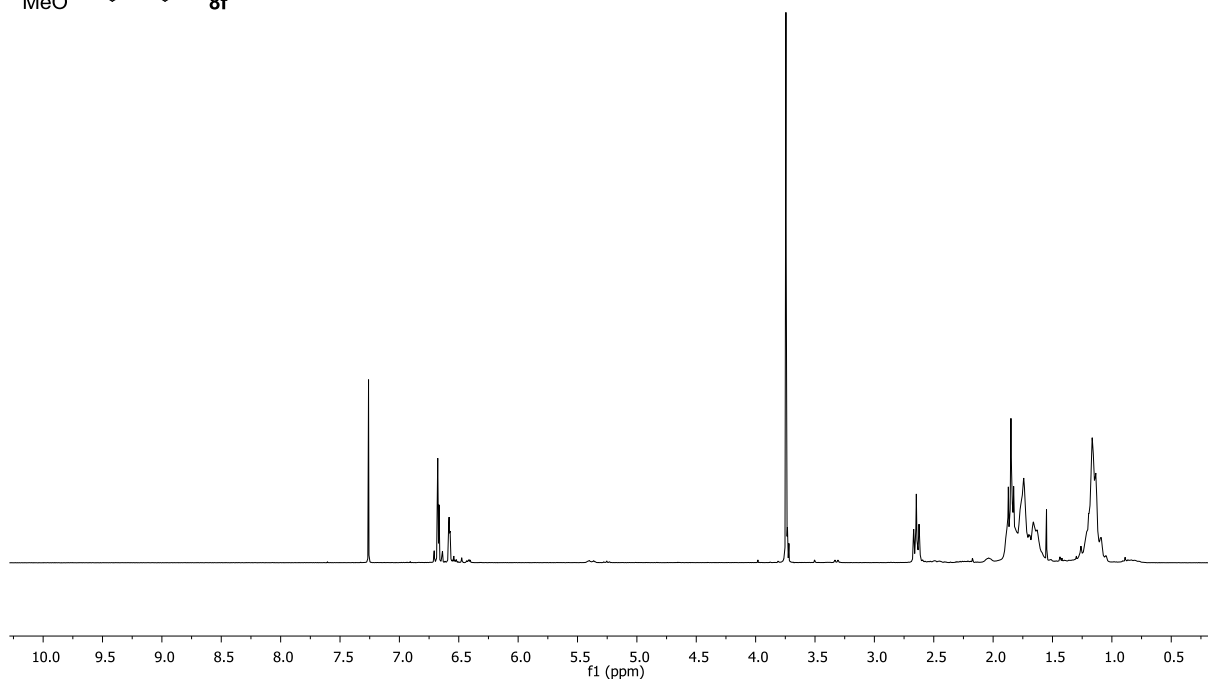

elccb041a  
 13C 75.5MHz Job 25158 Coutant Eloi B041A CDCl3 19.6°C 3 hours 1 min  
 2,2-dicyclohexyl-6-methoxychroman

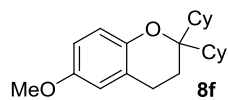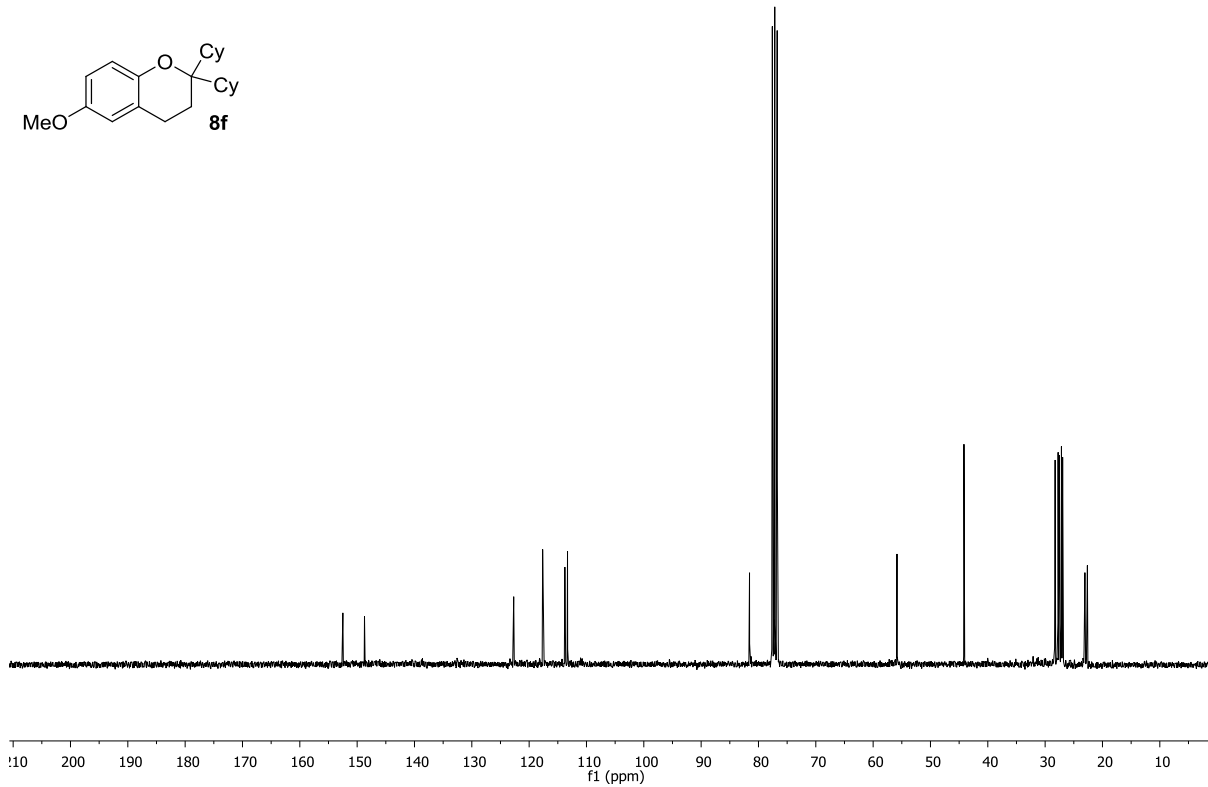

## 2,2-Dicyclohexyl-6-fluorochroman (8g)

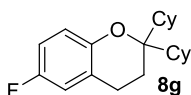

1,1-Dicyclohexylprop-2-en-1-ol (**7**, 15.1 mg, 67.9  $\mu\text{mol}$ ) and 4-fluorophenol (**5g**, 15.1 mg, 135  $\mu\text{mol}$ ) were dissolved in toluene (0.14 mL).  $\text{PPh}_3\text{AuNTf}_2$  (as the 2:1 toluene adduct) (2.5 mg, 3.4  $\mu\text{mol}$ ) was added to the resulting solution. The reaction was allowed to stir at 60 °C for 18 hours. The reaction was then filtered over a plug of silica, using diethyl ether as eluent. The crude mixture was purified using column chromatography, using a gradient eluent system of neat hexane to 9:1 hexane:diethyl ether. Product **8g** was obtained as a yellowish amorphous solid (11.5 mg, 36.3  $\mu\text{mol}$ , 54%).

$\nu_{\text{max}}/\text{cm}^{-1}$  2923, 2852, 1490, 1449, 1433, 1254, 1232, 1212, 1138, 945, 895, 861, 808, 758, 727.

$\delta_{\text{H}}$  (300 MHz,  $\text{CDCl}_3$ ) 6.84–6.62 (3H, m, Ar-H), 2.64 (2H, t,  $J$  6.7 Hz,  $\text{CH}_2$ ), 1.90–1.56 (12H, m, Cy-H), 1.85 (2H, t,  $J$  6.7 Hz,  $\text{CH}_2$ ), 1.31–1.01 (10H, m, Cy-H).

$\delta_{\text{C}}$  (75 MHz,  $\text{CDCl}_3$ ) 156.2 (d,  $J$  236.3 Hz, C), 150.7 (C), 123.2 (d,  $J$  7.3 Hz, C), 117.8 (d,  $J$  8.0 Hz, CH), 114.9 (d,  $J$  22.3 Hz, CH), 113.9 (d,  $J$  22.9 Hz, CH), 82.0 (C), 44.2 (CH), 28.2 ( $\text{CH}_2$ ), 27.8 ( $\text{CH}_2$ ), 27.5 ( $\text{CH}_2$ ), 27.2 ( $\text{CH}_2$ ), 26.9 ( $\text{CH}_2$ ), 22.9 ( $\text{CH}_2$ ), 22.5 ( $\text{CH}_2$ ).

$\delta_{\text{F}}$  (282 MHz,  $\text{CDCl}_3$ ) -126.12 (td,  $J$  8.5, 5.1 Hz).

Found (APCI<sup>+</sup>)  $[\text{M} + \text{H}]^+$  317.2278,  $\text{C}_{21}\text{H}_{30}\text{FO}$  requires 317.2275.



elchb047b  
 1H 300.1MHz Job 25414 Coutant Eloï B047B CDCl3 25.0°C  
 B fraction, fluorochroman? - DiCyAA + 2eq 4-fluorophenol,60C,o/n

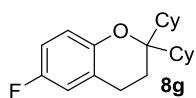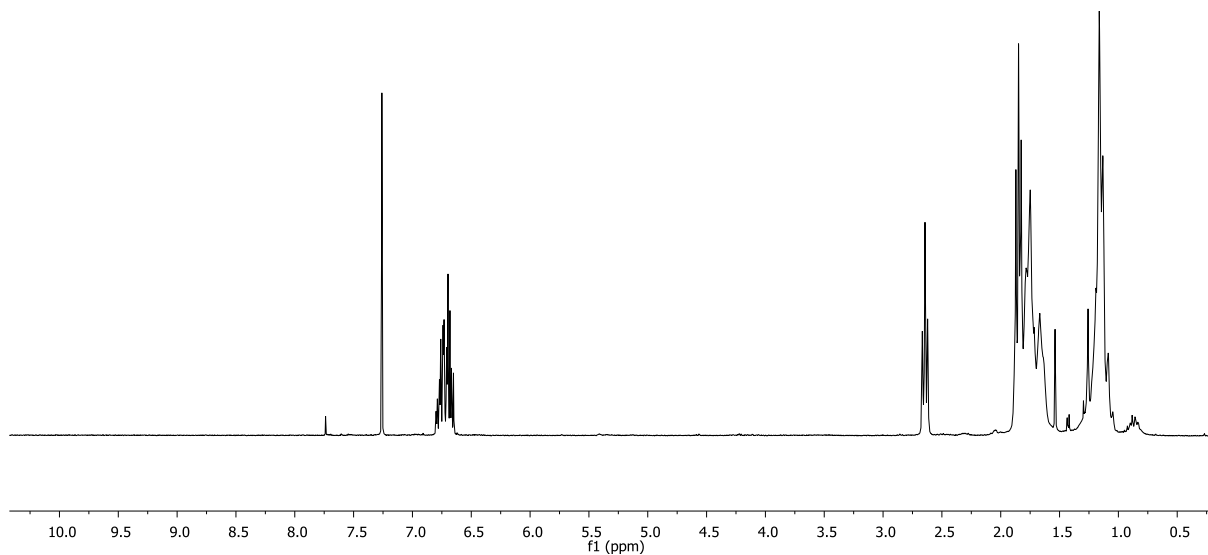

elccb047b  
 13C 75.5MHz Job 25434 Coutant Eloï B047B CDCl3 25.0°C 3 hours 1 min  
 B fraction, fluorochroman? - DiCyAA + 2eq 4-fluorophenol,60C,o/n

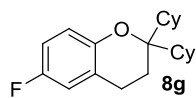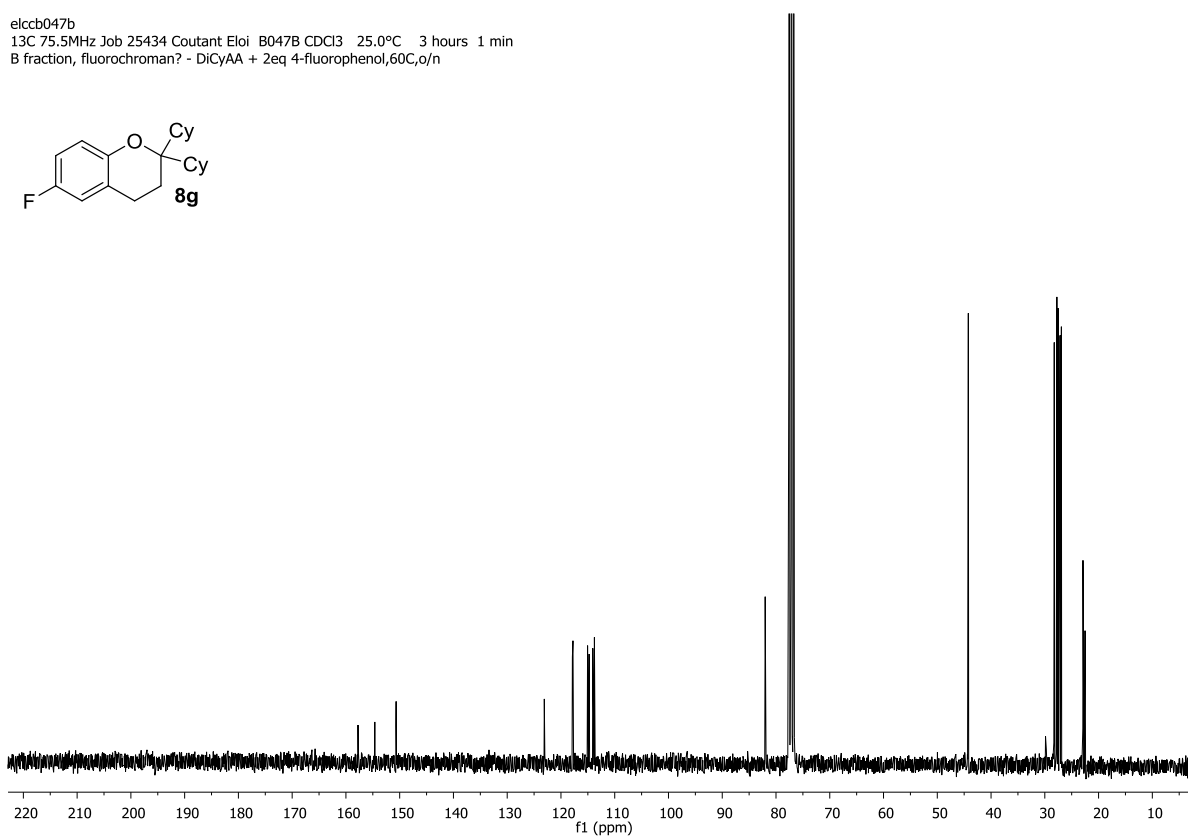

elcfb047b  
19F 282.4MHz Job 26893 Coutant Eloi B047B CDCl3 25.0°C 0hours 1min  
2,2-dicyclohexyl-6-fluorochroman

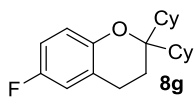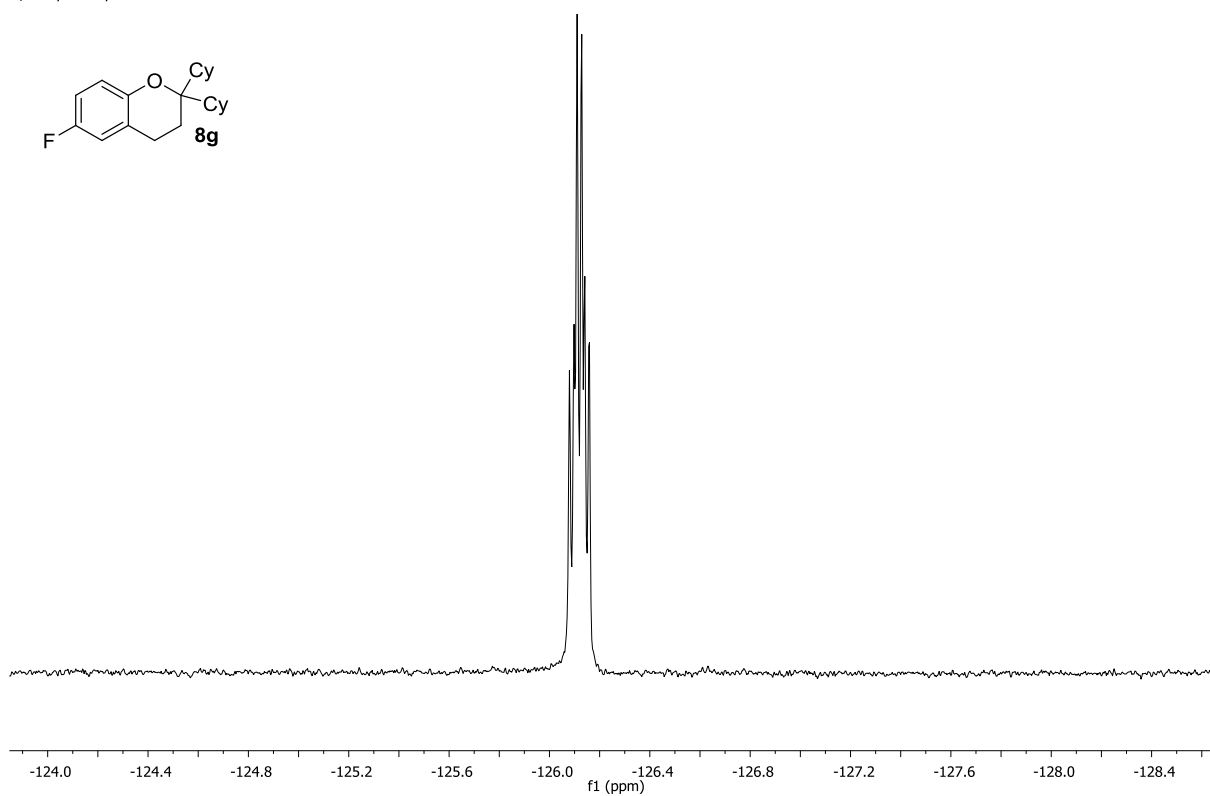

## 6-Bromo-2,2-dicyclohexylchroman (**8h**)

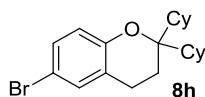

1,1-Dicyclohexylprop-2-en-1-ol (**7**, 14.6 mg, 65.7  $\mu\text{mol}$ ) and 4-bromophenol (**5h**, 58.4 mg, 338  $\mu\text{mol}$ ) were dissolved in toluene (0.14 mL).  $\text{PPh}_3\text{AuNTf}_2$  (as the 2:1 toluene adduct) (2.6 mg, 3.5  $\mu\text{mol}$ ) was added to the resulting solution. The reaction was allowed to stir at 60 °C for 17 hours. The reaction was then filtered over a plug of silica, using diethyl ether as eluent. The crude mixture was purified using column chromatography; using neat hexane. Product **8h** was obtained as a white solid (14.4 mg, 38.2  $\mu\text{mol}$ , 58%).

Mp: 105–107 °C.

$\nu_{\text{max}}/\text{cm}^{-1}$  2922, 2851, 1476, 1448, 1257, 1243, 1185, 985, 871, 810, 756.

$\delta_{\text{H}}$  (300 MHz,  $\text{CDCl}_3$ ) 7.18–7.10 (2H, m, Ar-H), 6.69–6.59 (1H, m, Ar-H), 2.64 (2H, t,  $J$  6.7 Hz,  $\text{CH}_2$ ), 1.85 (2H, d,  $J$  6.7 Hz,  $\text{CH}_2$ ), 1.90–1.61 (12H, m, Cy-H), 1.24–1.01 (10H, m, Cy-H).

$\delta_{\text{C}}$  (75 MHz,  $\text{CDCl}_3$ ) 153.9 (C), 131.6 (CH), 130.2 (CH), 124.4 (C), 119.0 (CH), 111.0 (C), 82.5 (C), 44.3 (CH), 28.2 (CH), 27.7 ( $\text{CH}_2$ ), 27.5 ( $\text{CH}_2$ ), 27.1 ( $\text{CH}_2$ ), 26.9 ( $\text{CH}_2$ ), 22.8 ( $\text{CH}_2$ ), 22.1 ( $\text{CH}_2$ ).

Found (APCI<sup>+</sup>)  $[\text{M} + \text{H}]^+$  377.1473,  $\text{C}_{21}\text{H}_{30}\text{BrO}$  requires 377.1475.

elchb077a  
 1H 300.1MHz Job 26894 Coutant Eloi B077A CDCl3 25.0°C  
 6-bromo-2,2-dicyclohexylchroman

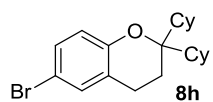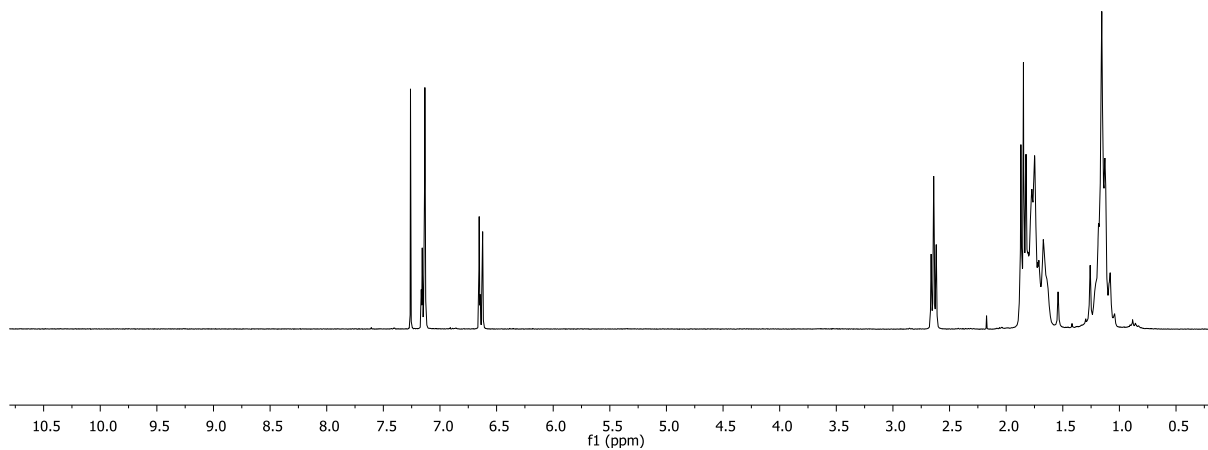

elcc077a  
 13C 75.5MHz Job 26785 Coutant Eloi 077A CDCl3 25.0°C 3 hours 1 min  
 6-bromo-2,2-dicyclohexylchroman ?

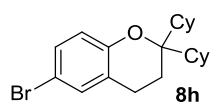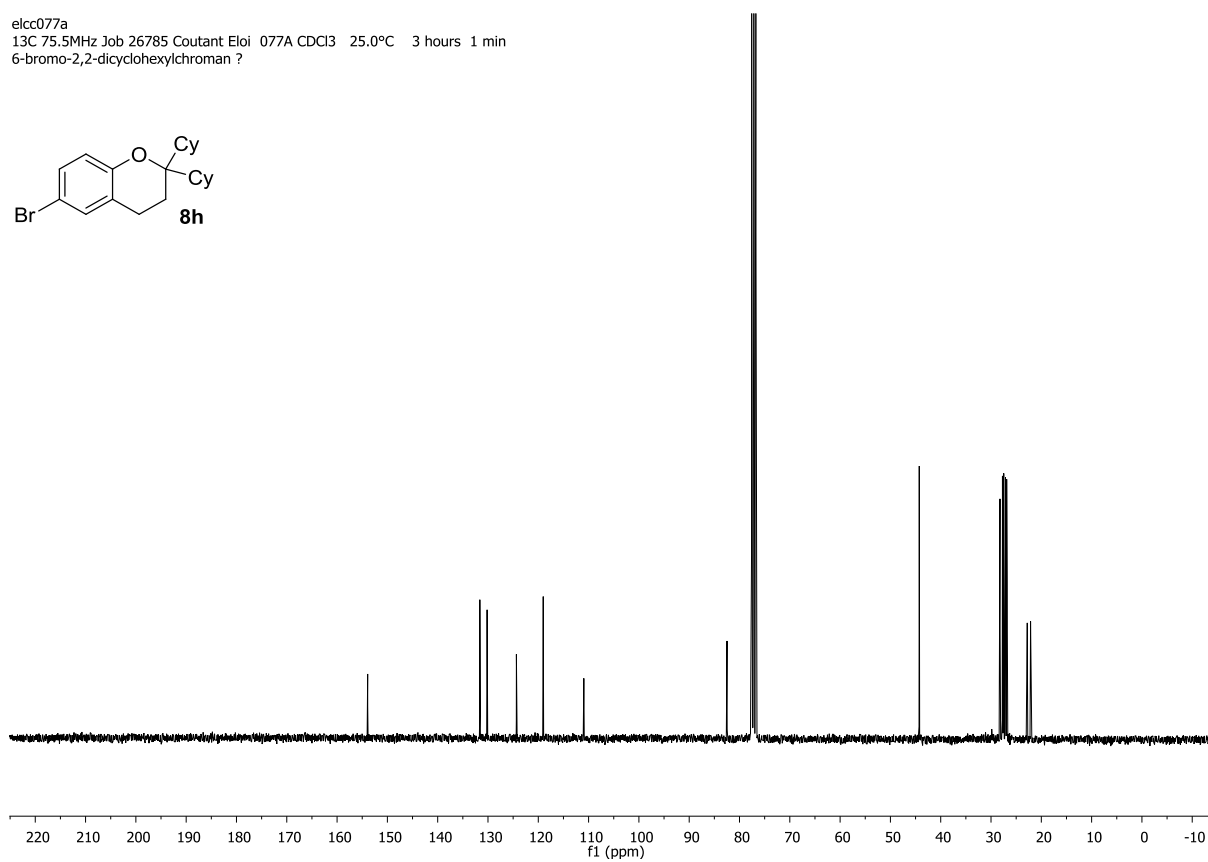

## 6-(*tert*-Butyl)-2,2-dicyclohexylchroman (**8i**)

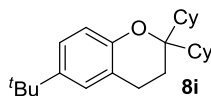

1,1-Dicyclohexylprop-2-en-1-ol (**7**, 15.1mg, 67.9  $\mu\text{mol}$ ) and 4-(*tert*-butyl)-phenol (**5i**, 20.4 mg, 136  $\mu\text{mol}$ ) were dissolved in toluene (0.14 mL).  $\text{PPh}_3\text{AuNTf}_2$  (as the 2:1 toluene adduct) (2.5 mg, 3.4  $\mu\text{mol}$ ) was added to the resulting solution. The reaction was allowed to stir at 60 °C for 17 hours. The reaction was then filtered over a plug of silica, using diethyl ether as eluent. The crude mixture was purified using column chromatography, using a gradient eluent system of neat hexane to 9:1 hexane:diethyl ether. Product **8i** was obtained as a colourless oil (13.8 mg, 38.9  $\mu\text{mol}$ , 57%).

$\nu_{\text{max}}/\text{cm}^{-1}$  2924, 2852, 1499, 1450, 1363, 1268, 1257, 1244, 1187, 1132, 988, 892, 818, 760.

$\delta_{\text{H}}$  (300 MHz,  $\text{CDCl}_3$ ) 7.09 (1H, dd,  $J$  8.5, 2.5 Hz, Ar-H), 7.00 (1H, d,  $J$  2.5 Hz, Ar-H), 6.69 (1H, d,  $J$  8.5 Hz, Ar-H), 2.65 (2H, t,  $J$  6.6 Hz,  $\text{CH}_2$ ), 1.86 (2H, t,  $J$  6.7 Hz,  $\text{CH}_2$ ), 1.94–1.57 (12H, m, Cy-H), 1.29 (9H, s,  $\text{C}(\text{CH}_3)_3$ ), 1.25–1.07 (10H, m, Cy-H).

$\delta_{\text{C}}$  (75 MHz,  $\text{CDCl}_3$ ) 152.3 (C), 141.5 (C), 125.8 (CH), 124.3 (CH), 121.0 (C), 116.5 (CH), 81.8 (C), 44.2 ( $\text{CH}_3$ ), 34.1 (C), 31.8 (CH), 28.3 ( $\text{CH}_2$ ), 27.8 ( $\text{CH}_2$ ), 27.5 ( $\text{CH}_2$ ), 27.2 ( $\text{CH}_2$ ), 27.0 ( $\text{CH}_2$ ), 23.1 ( $\text{CH}_2$ ), 22.4 ( $\text{CH}_2$ ).

Found (APCI<sup>+</sup>)  $[\text{M} + \text{H}]^+$  355.2994,  $\text{C}_{25}\text{H}_{38}\text{O}$  requires 355.2995.

elchb034a  
 1H 300.1MHz Job 24718 Coutant Eloi B034A CDCl3 25.0°C  
 50:1 fraction - DiCyAA + 2eq p-tBuPhenol, 60C, o/n

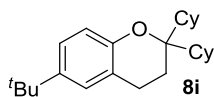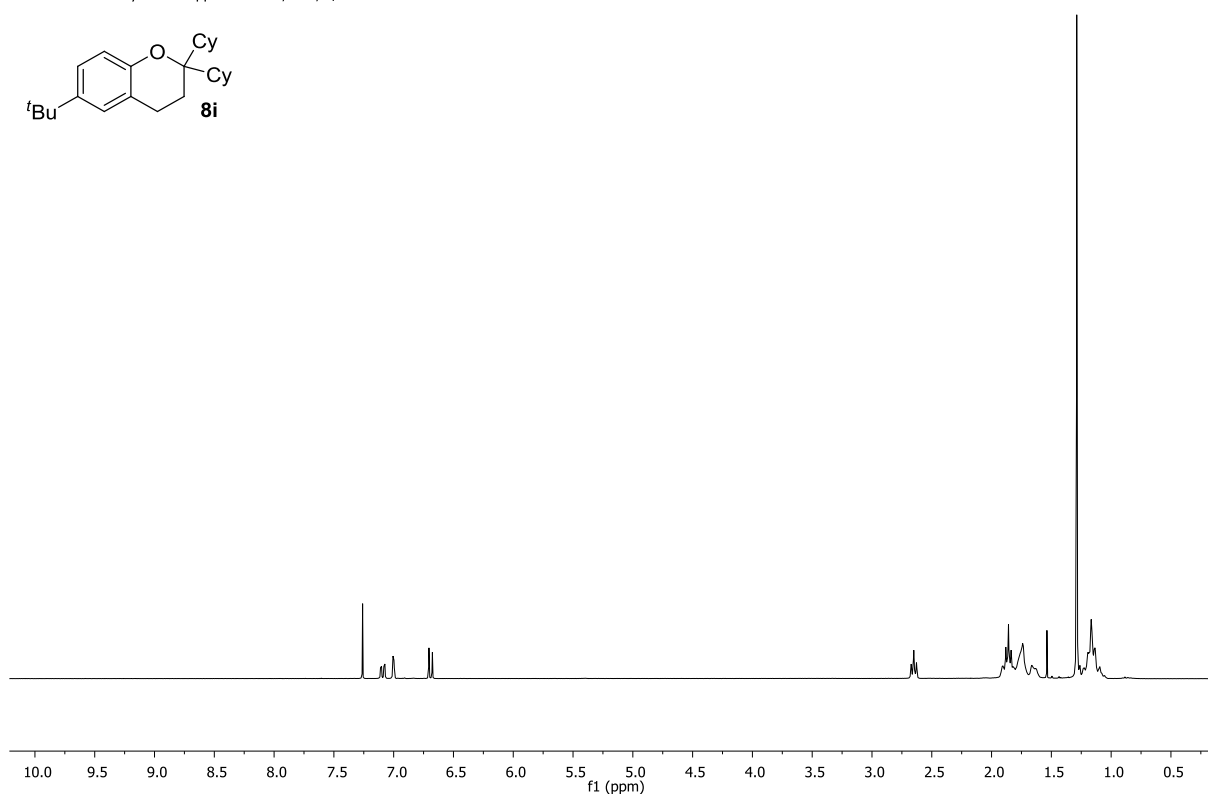

elccb034a  
 13C 75.5MHz Job 24758 Coutant Eloi B034A CDCl3 25.0°C 3 hours 1 min  
 p-tBu-DiCyChroman - DiCyAA + 2eq p-tBuPhenol, 60C, o/n

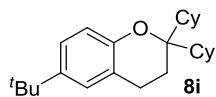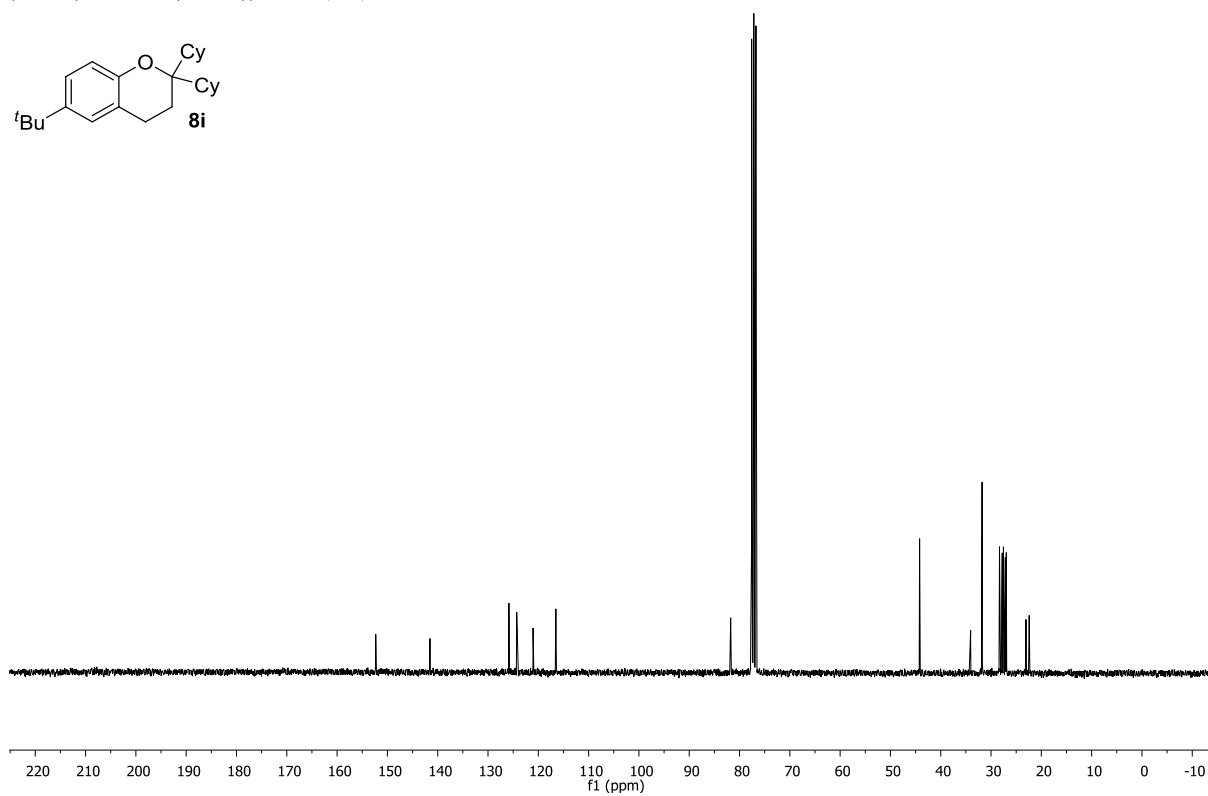

## 6,8-Di-*tert*-butyl-2,2-dicyclohexylchroman (**8j**)

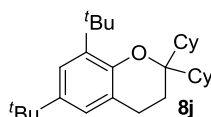

1,1-Dicyclohexylprop-2-en-1-ol (**7**, 19.8 mg, 89.0  $\mu\text{mol}$ ) and 2,4-di-*tert*-butylphenol (**5j**, 93.3 mg, 452  $\mu\text{mol}$ ) were dissolved in toluene (0.19 mL).  $\text{PPh}_3\text{AuNTf}_2$  (as the 2:1 toluene adduct) (3.4 mg, 4.6  $\mu\text{mol}$ ) was added to the resulting solution. The reaction was allowed to stir at 70  $^\circ\text{C}$  for 43 hours. The reaction was then filtered over a plug of silica, using diethyl ether as eluent. The crude mixture was purified using column chromatography, using a gradient eluent system of neat hexane to 9:1 hexane:diethyl ether. Product **8j** was obtained as a colourless oil (30.6 mg, 74.5  $\mu\text{mol}$ , 83%).

$\nu_{\text{max}}/\text{cm}^{-1}$  2923, 2853, 1470, 1446, 1361, 1231, 1203, 1173, 1128, 939, 895, 874, 754, 733.

$\delta_{\text{H}}$  (300 MHz,  $\text{CDCl}_3$ ) 7.15 (1H, d,  $J$  2.5 Hz, Ar-H), 6.87 (1H, d,  $J$  2.5 Hz, Ar-H), 2.69 (2H, t,  $J$  6.7 Hz,  $\text{CH}_2$ ), 1.86 (2H, t,  $J$  6.7 Hz,  $\text{CH}_2$ ), 2.03–1.58 (12H, m, Cy-H), 1.40 (9H, s,  $\text{C}(\text{CH}_3)_3$ ), 1.30 (9H, s,  $\text{C}(\text{CH}_3)_3$ ), 1.29–1.07 (10H, m, Cy-H).

$\delta_{\text{C}}$  (75 MHz,  $\text{CDCl}_3$ ) 150.7 (C), 140.1 (C), 136.4 (C), 123.9 (CH), 122.0 (CH), 120.7 (C), 83.1 (C), 44.7 (CH), 35.1 (C), 34.1 (C), 31.7 ( $\text{CH}_3$ ), 30.5 ( $\text{CH}_3$ ), 28.5 ( $\text{CH}_2$ ), 28.0 ( $\text{CH}_2$ ), 27.4 ( $\text{CH}_2$ ), 27.0 ( $\text{CH}_2$ ), 26.9 ( $\text{CH}_2$ ), 23.2 ( $\text{CH}_2$ ), 23.1 ( $\text{CH}_2$ ).

Found ( $\text{NSI}^+$ )  $[\text{M} + \text{H}]^+$  411.3622,  $\text{C}_{29}\text{H}_{47}\text{O}$  requires 411.3621.

elchc059a  
 1H 300.1MHz Job 26081 Coutant Eloï C059A CDCl3 25.2°C  
 A fraction - DiCyAA + 5eq 2,4-di(tBu)phenol, 70°C, 2d

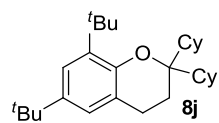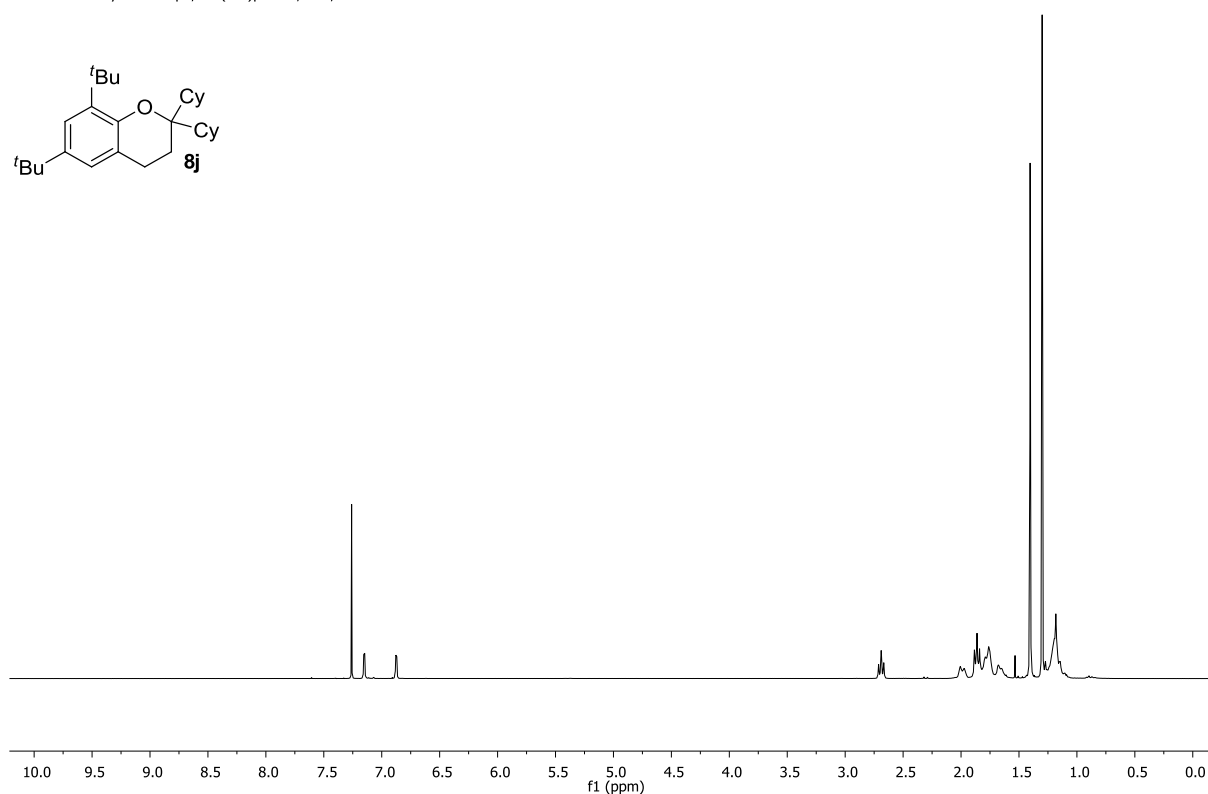

elccb059a  
 13C 75.5MHz Job 26130 Coutant Eloï B059A CDCl3 25.0°C 0 hour 36 min  
 A fraction - DiCyAA + 5eq 2,4-di(tBu)phenol, 70°C, 2d

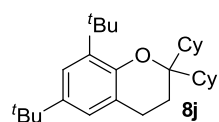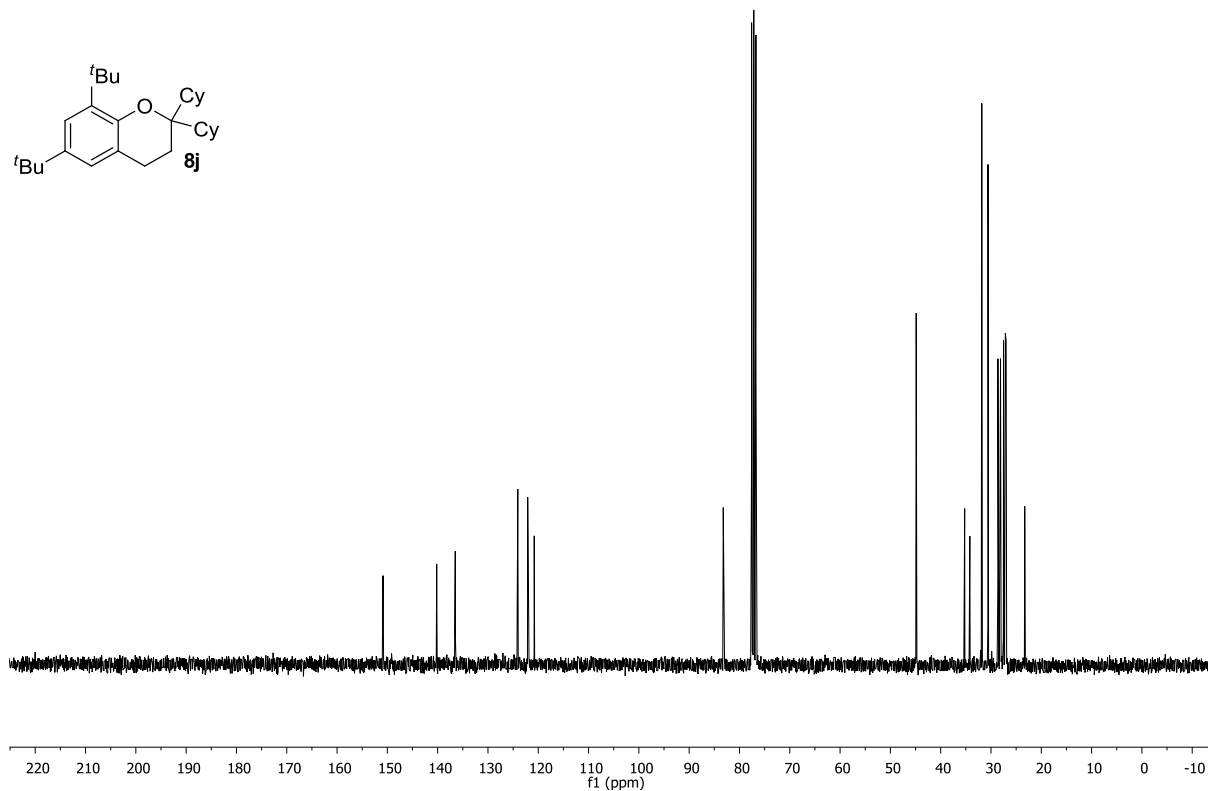



## Methyl 2,2-dicyclohexylchroman-6-carboxylate (**8k**)

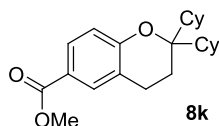

1,1-Dicyclohexylprop-2-en-1-ol (**7**, 14.7 mg, 66.1  $\mu\text{mol}$ ) and methyl 4-hydroxybenzoate (**5k**, 51.5 mg, 338  $\mu\text{mol}$ ) were dissolved in dioxane (0.21 mL).  $\text{PPh}_3\text{AuNTf}_2$  (as the 2:1 toluene adduct) (2.5 mg, 3.4  $\mu\text{mol}$ ) was added to the resulting solution. The reaction was allowed to stir at 70 °C for 48 hours and 80 °C for 17 hours. The reaction was then filtered over a plug of silica, using ethyl acetate as eluent. The crude mixture was purified using column chromatography (10:1 hexane:diethyl ether). Product **8k** was obtained yellowish oil (16.3 mg, 45.7  $\mu\text{mol}$ , 69%).

$\nu_{\text{max}}/\text{cm}^{-1}$  2922, 2852, 1717, 1611, 1582, 1495, 1438, 1285, 1259, 1193, 1178, 1115, 1101, 983, 769, 755.

$\delta_{\text{H}}$  (300 MHz,  $\text{CDCl}_3$ ) 7.77 (2H, m, Ar-H), 6.80–6.75 (1H, m, Ar-H), 3.86 (3H, s,  $\text{CH}_3$ ), 2.70 (2H, t,  $J$  6.7 Hz,  $\text{CH}_2$ ), 1.89 (2H, t,  $J$  6.7 Hz,  $\text{CH}_2$ ), 1.94–0.70 (22H, m, Cy-H).

$\delta_{\text{C}}$  (75 MHz,  $\text{CDCl}_3$ ) 167.4 (C), 159.1 (C), 131.4 (CH), 129.3 (CH), 121.8 (C), 121.0 (C), 117.1 (CH), 83.4 (C), 51.8 ( $\text{CH}_3$ ), 44.4 (CH), 28.2 ( $\text{CH}_2$ ), 27.7 ( $\text{CH}_2$ ), 27.5 ( $\text{CH}_2$ ), 27.1 ( $\text{CH}_2$ ), 26.9 ( $\text{CH}_2$ ), 22.9 ( $\text{CH}_2$ ), 22.0 ( $\text{CH}_2$ ).

Found (NSI<sup>+</sup>)  $[\text{M} + \text{H}]^+$  357.2425,  $\text{C}_{23}\text{H}_{33}\text{O}_3$  requires 357.2424.

elcha083a  
 1H 300.1MHz Job 27282 Coutant Eloi A083A CDCl3 25.0°C  
 Isolated product - EC83:A

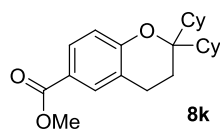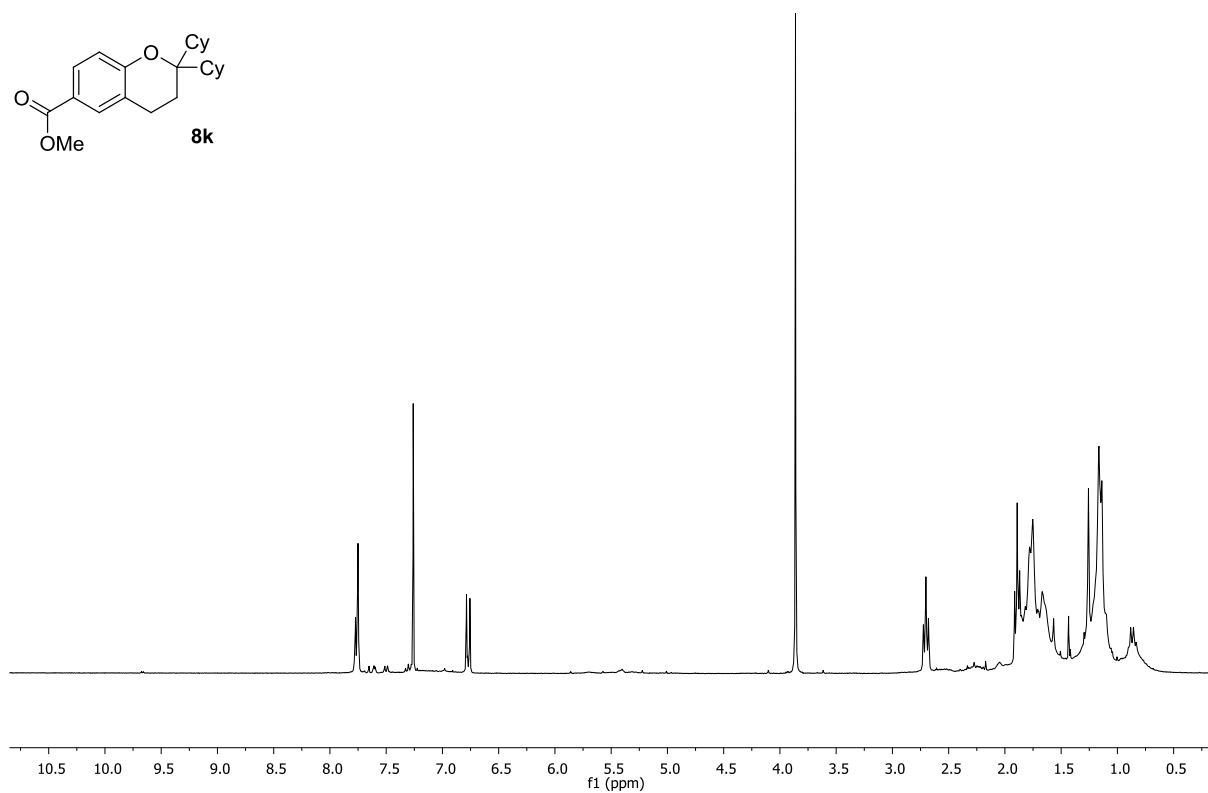

elcca083a  
 13C 75.5MHz Job 27339 Coutant Eloi A083A CDCl3 25.0°C 3 hours 1 min  
 EC83:A

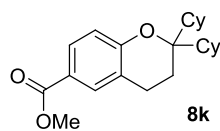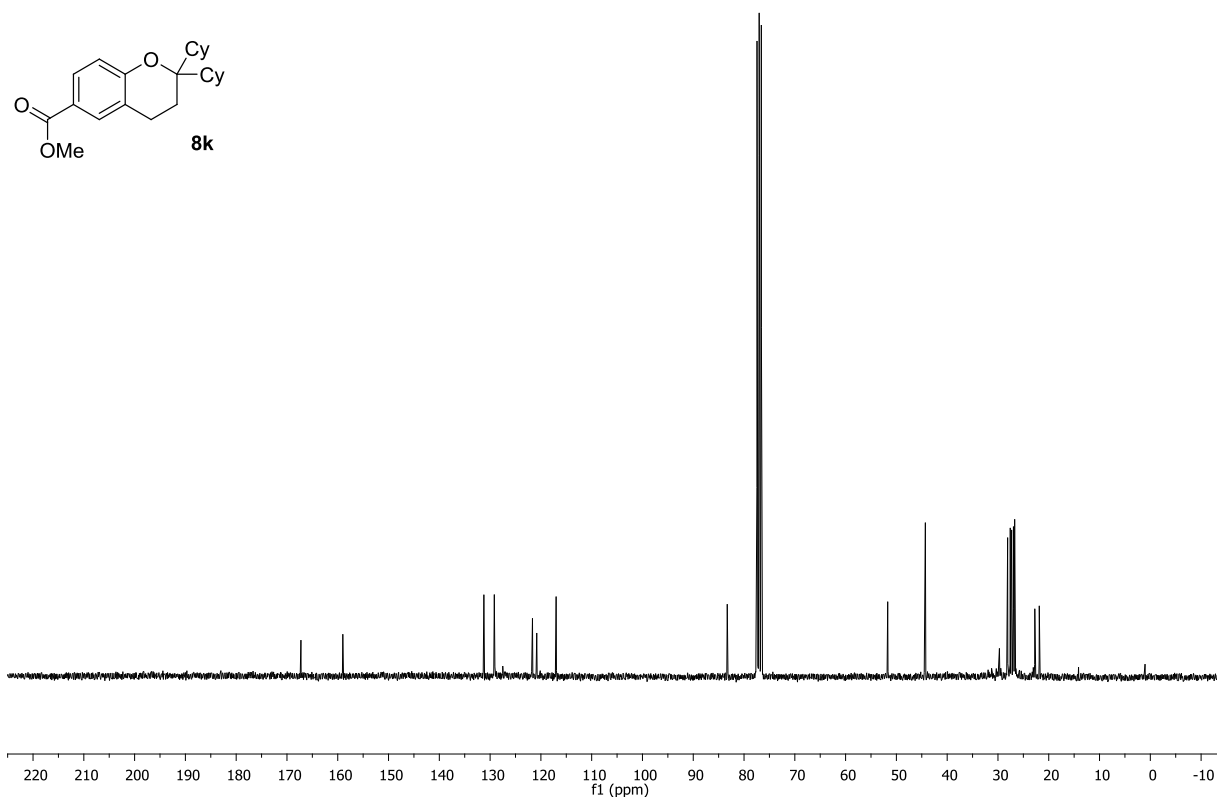

## 2,2-Dicyclohexyl-5,7,8-trimethylchroman-6-ol (**8I**)

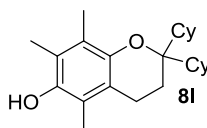

Reaction carried out in a sealed tube. 1,1-Dicyclohexylprop-2-en-1-ol (**7**, 15.4 mg, 69.2  $\mu\text{mol}$ ) and trimethylhydroquinone (**5I**, 51.2 mg, 336  $\mu\text{mol}$ ) were dissolved in dioxane (0.14 mL).  $\text{PPh}_3\text{AuNTf}_2$  (as the 2:1 toluene adduct) (2.7 mg, 3.7  $\mu\text{mol}$ ) was added to the resulting solution. The reaction was tightly sealed and allowed to stir at 90 °C for 65.5 hours. The reaction was then filtered over a plug of silica, using ethyl acetate as eluent. The crude mixture was purified using column chromatography, using a gradient eluent system of neat hexane to 20:1 hexane:ethyl acetate. Product **8I** was obtained as a brown oil (20.5 mg, 57.5  $\mu\text{mol}$ , 83%).

$\nu_{\text{max}}/\text{cm}^{-1}$  3465, 2923, 2852, 1449, 1420, 1260, 1213, 1082, 1067, 908, 733.

$\delta_{\text{H}}$  (300 MHz,  $\text{CDCl}_3$ ) 4.15 (1H, s,  $\text{OH}$ ), 2.54 (2H, t,  $J$  6.8 Hz,  $\text{CH}_2$ ), 2.16 (3H, s,  $\text{CH}_3$ ), 2.11 (6H, s,  $\text{CH}_3$ ), 1.85 (2H, t,  $J$  6.8 Hz,  $\text{CH}_2$ ), 1.90–1.53 (12H, m,  $\text{Cy-H}$ ), 1.23–1.06 (10H, m,  $\text{Cy-H}$ ).

$\delta_{\text{C}}$  (75 MHz,  $\text{CDCl}_3$ ) 145.9 (C), 144.3 (C), 122.6 (C), 121.1 (C), 118.3 (C), 117.9 (C), 80.1 (C), 43.8 (CH), 28.4 ( $\text{CH}_2$ ), 28.0 ( $\text{CH}_2$ ), 27.6 ( $\text{CH}_2$ ), 27.2 ( $\text{CH}_2$ ), 27.0 ( $\text{CH}_2$ ), 23.4 ( $\text{CH}_2$ ), 20.5 ( $\text{CH}_2$ ), 12.4 ( $\text{CH}_3$ ), 12.0 ( $\text{CH}_3$ ), 11.4 ( $\text{CH}_3$ ).

Found (NSI<sup>+</sup>)  $[\text{M} + \text{H}]^+$  357.2788,  $\text{C}_{24}\text{H}_{37}\text{O}_2$  requires 357.2788.

pcyh723  
 1H 300.1MHz Job 27484 Young Paul C C723 CDCl3 25.0°C  
 Isolated - chroman

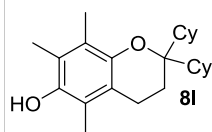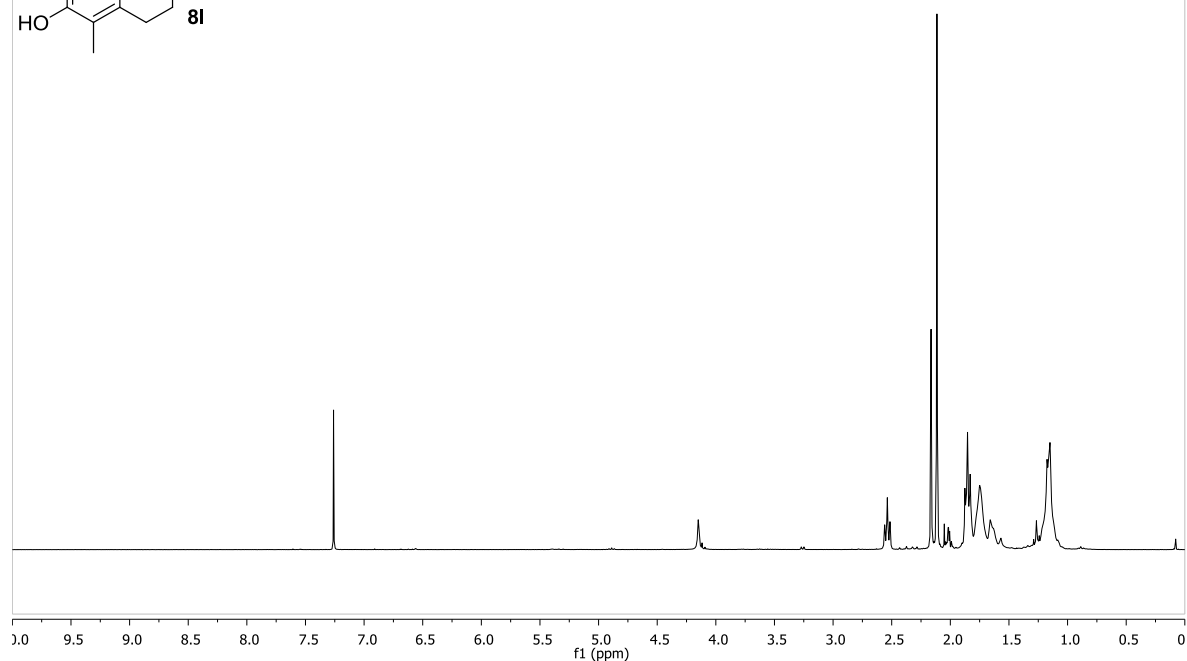

pcyc723  
 13C 75.5MHz Job 27487 Young Paul C C723 CDCl3 25.0°C 3 hours 1 min  
 Isolated chroman

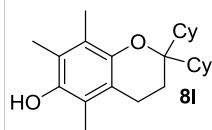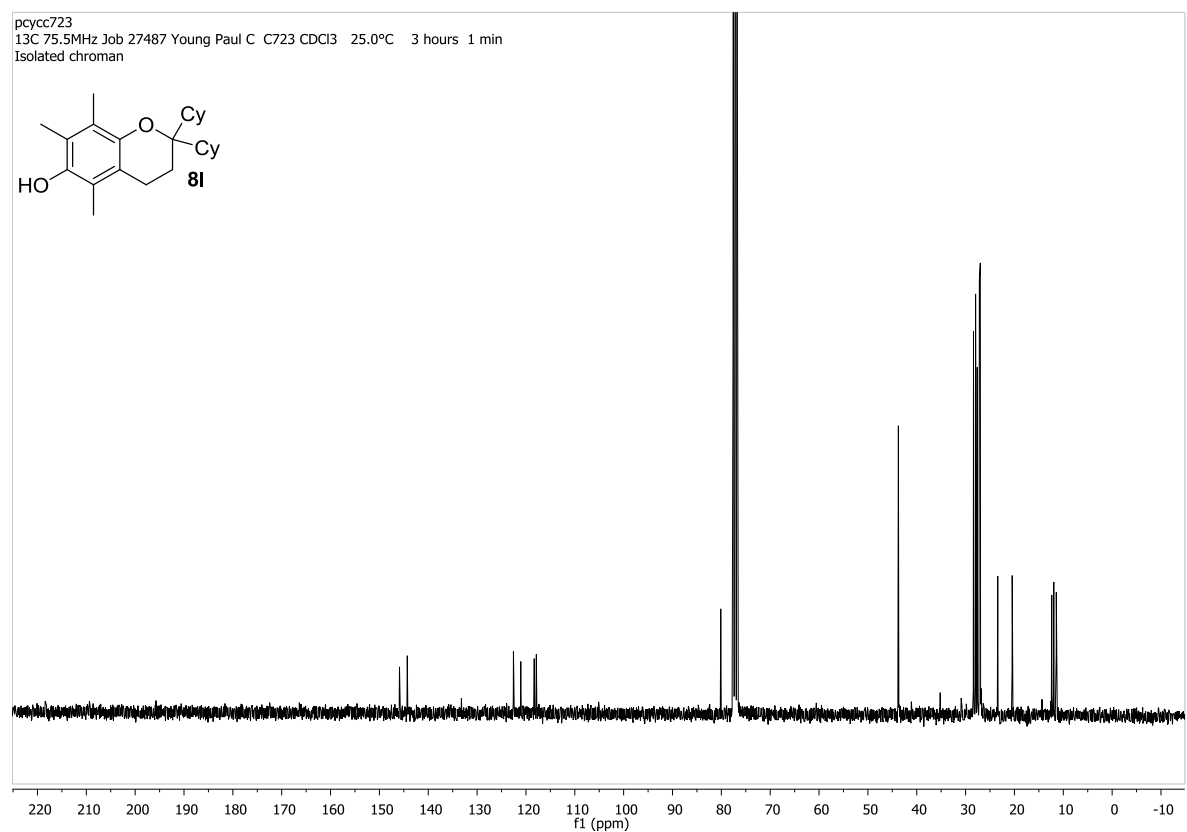

## 2-(3,3-Dicyclohexylallyl)-3,5,6-trimethylcyclohexa-2,5-diene-1,4-dione (11)

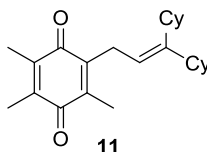

1,1-Dicyclohexylprop-2-en-1-ol (**7**, 15.1 mg, 67.9  $\mu\text{mol}$ ) and trimethylhydroquinone (**5I**, 51.0 mg, 335  $\mu\text{mol}$ ) were dissolved in dioxane (0.14 mL).  $\text{PPh}_3\text{AuNTf}_2$  (as the 2:1 toluene adduct) (2.5 mg, 3.4  $\mu\text{mol}$ ) was added to the resulting solution. The reaction was sealed and allowed to stir at 80  $^\circ\text{C}$  for 65.5 hours. The reaction was then filtered over a plug of silica, using ethyl acetate as eluent. The crude mixture was purified using column chromatography, using a gradient eluent system of neat hexane to 7:1 hexane:ethyl acetate. Product **11** was obtained as a yellow oil (8.5 mg, 24.0  $\mu\text{mol}$ , 35%). (The major product is chroman **8I** at 45%)

$\nu_{\text{max}}/\text{cm}^{-1}$  2924, 2851, 1642, 1448, 1374, 1302, 1262.

$\delta_{\text{H}}$  (300 MHz,  $\text{CDCl}_3$ ) 4.88 (1H, t,  $J$  6.9 Hz,  $\text{CH}$ ), 3.25 (2H, d,  $J$  6.9 Hz,  $\text{C}_{\text{H}_2}$ ), 2.63–2.48 (1H, m,  $\text{Cy-H}$ ), 2.05–1.96 (9H, m,  $3\times\text{CH}_3$ ), 1.92–0.97 (21H, m,  $\text{Cy-H}$ ).

$\delta_{\text{C}}$  (75 MHz,  $\text{CDCl}_3$ ) 188.2 (C), 187.1 (C), 152.0 (C), 144.0 (C), 140.6 (C), 140.4 (C), 122.1 (C), 117.5 (CH), 41.1 (CH), 40.1 (CH), 35.2 ( $\text{CH}_2$ ), 30.9 ( $\text{CH}_2$ ), 27.3 ( $\text{CH}_2$ ), 26.8 ( $\text{CH}_2$ ), 26.4 ( $\text{CH}_2$ ), 26.3 ( $\text{CH}_2$ ), 24.9 ( $\text{CH}_2$ ), 12.6 ( $\text{CH}_3$ ), 12.5 ( $\text{CH}_3$ ), 12.3 ( $\text{CH}_3$ ).

Found ( $\text{NSI}^+$ )  $[\text{M} + \text{H}]^+$  355.2630,  $\text{C}_{24}\text{H}_{35}\text{O}_2$  requires 355.2632.

pcyhb722.1.fid  
 1H 300.1MHz Job 27363 Young Paul C B722 CDCl3 25.1°C  
 Isolated top spot

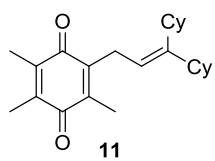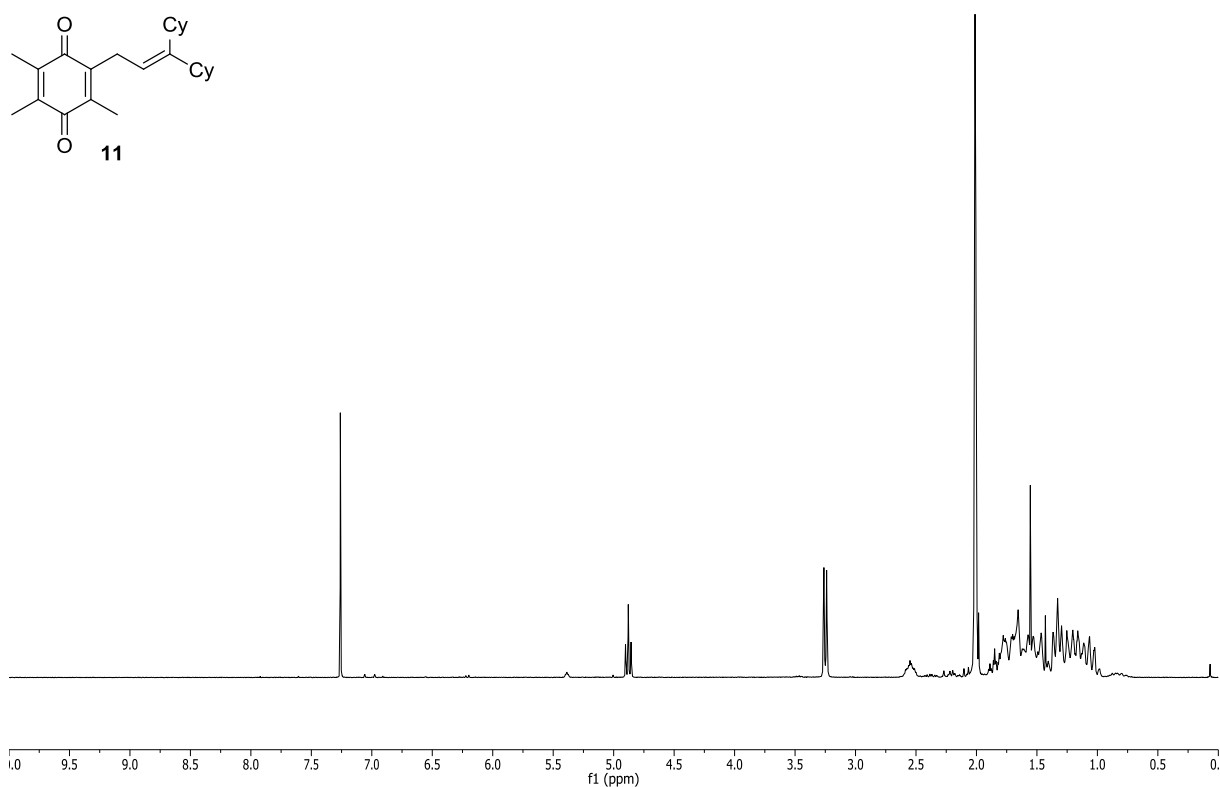

pcycb722.1.fid  
 13C 75.5MHz Job 27407 Young Paul C B722 CDCl3 24.9°C 3 hours 1 min  
 Isolated top spot

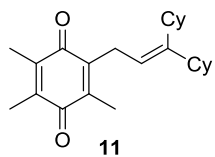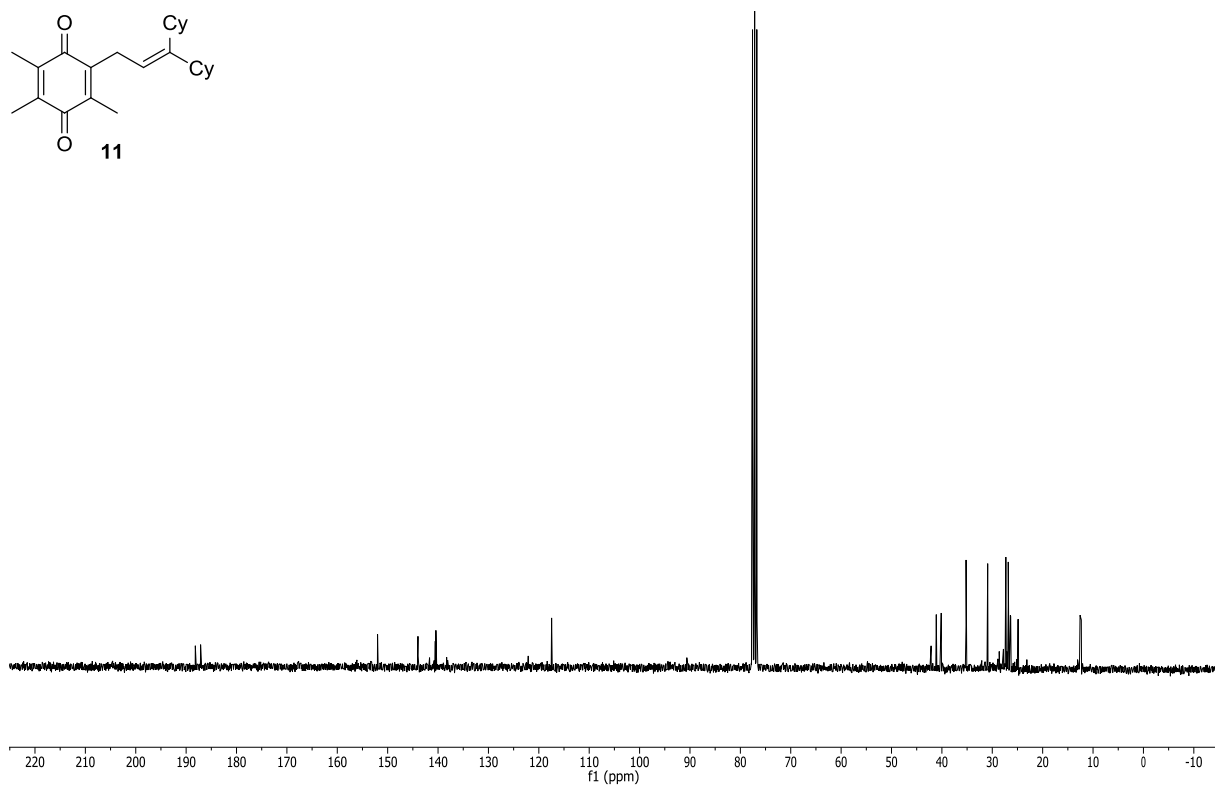

## 6,8-Di-*tert*-butyl-2,2-dihexylchroman (**8m**)

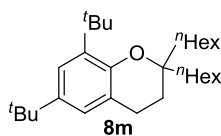

7-Vinyltridecan-7-ol (**12**, 19.9 mg, 87.9  $\mu\text{mol}$ ) and 2,4-di-*tert*-butylphenol (**5j**, 91.1 mg, 442  $\mu\text{mol}$ ) were dissolved in toluene (0.20 mL).  $\text{PPh}_3\text{AuNTf}_2$  (as the 2:1 toluene adduct) (3.4 mg, 4.6  $\mu\text{mol}$ ) was added to the resulting solution. The reaction was allowed to stir at 60  $^\circ\text{C}$  for 43 hours. The reaction was then filtered over a plug of silica, using diethyl ether as eluent. The crude product was purified using column chromatography, using a gradient eluent system of neat pentane to 9:1 pentane:diethyl ether. Product **8m** was obtained as a colourless oil (25.0 mg, 60.3  $\mu\text{mol}$ , 69%).

$\nu_{\text{max}}/\text{cm}^{-1}$  2953, 2928, 2859, 1467, 1444, 1361, 1231, 1203, 1127, 1056, 945, 876, 756.

$\delta_{\text{H}}$  (300 MHz,  $\text{CDCl}_3$ ) 7.15 (1H, d,  $J$  2.5 Hz, Ar-H), 6.90 (1H, d,  $J$  2.5 Hz, Ar-H), 2.72 (2H, t,  $J$  6.7 Hz,  $\text{CCH}_2\text{CH}_2\text{C}$ ), 1.78 (2H, t,  $J$  6.7 Hz,  $\text{CCH}_2\text{CH}_2\text{C}$ ), 1.67–1.57 (4H, m,  $2\times\text{CH}_2(\text{CH}_2)_4\text{CH}_3$ ), 1.39 (9H, s,  $\text{C}(\text{CH}_3)_3$ ), 1.30 (9H, s,  $\text{C}(\text{CH}_3)_3$ ), 1.36–1.26 (16H, m,  $2\times\text{CH}_2(\text{CH}_2)_4\text{CH}_3$ ), 0.89 (6H, t,  $J$  6.6 Hz,  $2\times(\text{CH}_2)_5\text{CH}_3$ ).

$\delta_{\text{C}}$  (75 MHz,  $\text{CDCl}_3$ ) 150.2 (C), 140.6 (C), 136.8 (C), 124.3 (CH), 121.9 (CH), 120.2 (C), 78.6 (C), 36.9 ( $\text{CH}_2$ ), 35.2 (C), 34.2 (C), 32.0 ( $\text{CH}_2$ ), 31.8 ( $\text{CH}_3$ ), 30.08 ( $\text{CH}_2$ ), 30.06 ( $\text{CH}_3$ ), 28.5 ( $\text{CH}_2$ ), 23.7 ( $\text{CH}_2$ ), 23.0 ( $\text{CH}_2$ ), 22.8 ( $\text{CH}_2$ ), 14.2 ( $\text{CH}_3$ ).

Found (APCI<sup>+</sup>)  $[\text{M} + \text{H}]^+$  415.3925,  $\text{C}_{29}\text{H}_{51}\text{O}$  requires 415.3934.

elchb058a  
 1H 300.1MHz Job 26033 Coutant Eloi B058A CDCl3 25.1°C  
 A fraction - Hexyl/Hexyl AA + 2,4-di(tBu)phenol, 60C, 2d

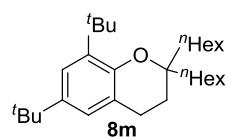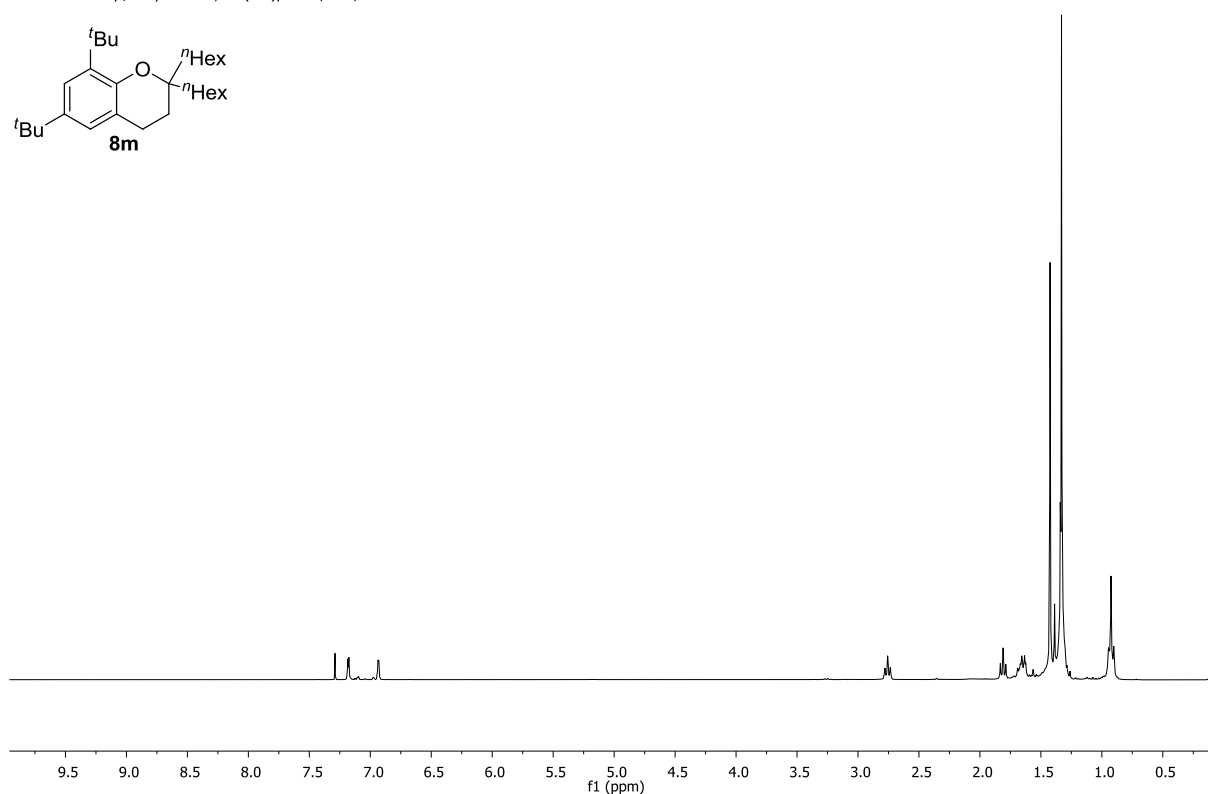

elccb058a  
 13C 75.5MHz Job 26096 Coutant Eloi B058A CDCl3 25.0°C 0 hour 36 min  
 A fraction - Hexyl/Hexyl AA + 2,4-di(tBu)phenol, 60C, 2d

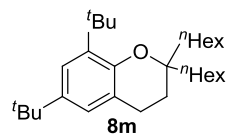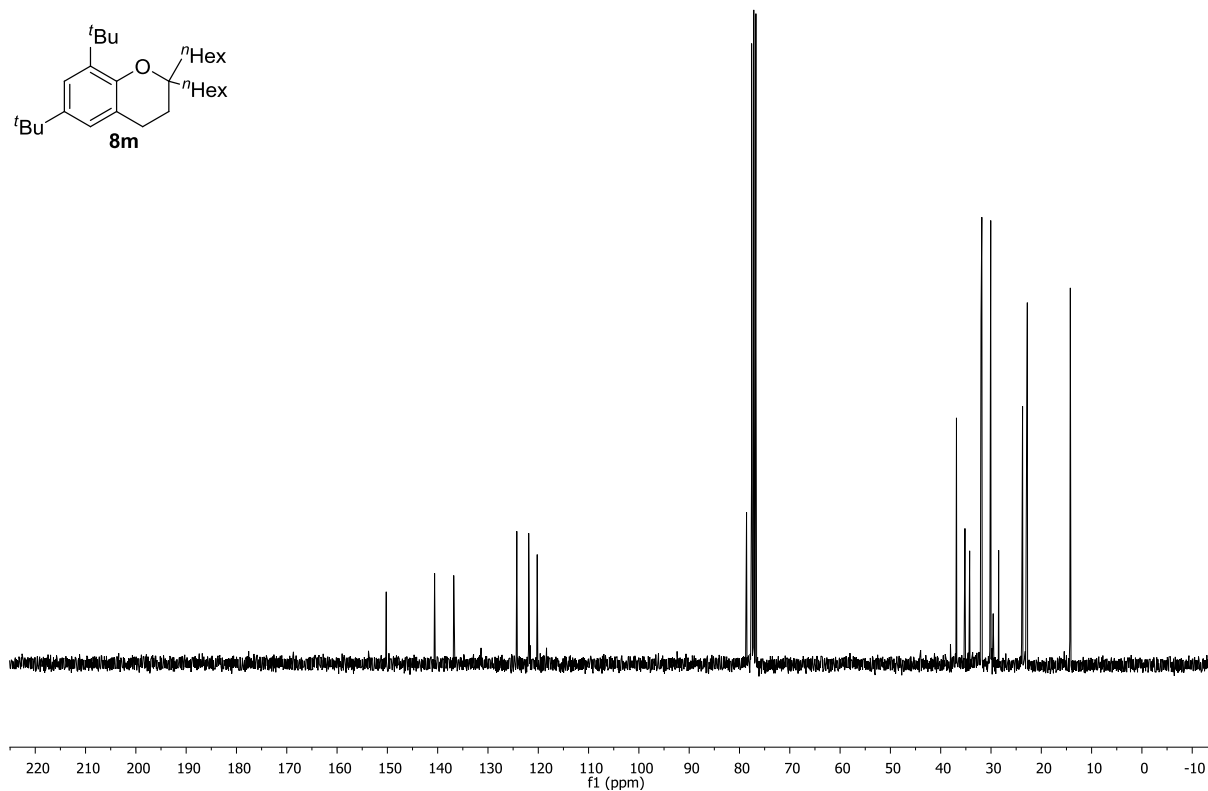



## 2,6,8-Tri-*tert*-butyl-2-methylchroman (**8n**)

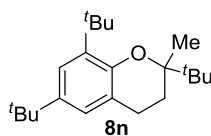

3,4,4-Trimethylpent-1-en-3-ol (**4**, 20.5 mg, 159.9  $\mu\text{mol}$ ) and 2,4-di-*tert*-butylphenol (**5j**, 162.9 mg, 790  $\mu\text{mol}$ ) were dissolved in toluene (0.34 mL).  $\text{PPh}_3\text{AuNTf}_2$  (as the 2:1 toluene adduct) (6 mg, 8.1  $\mu\text{mol}$ ) was added to the resulting solution. The reaction was allowed to stir at 60 °C for 67 hours. The reaction was then filtered over a plug of silica, using diethyl ether as the eluent. The crude mixture was purified using column chromatography, using a gradient eluent system of neat hexane to neat diethyl ether. Product **8n** was obtained as a yellowish oil (41.9 mg, 132  $\mu\text{mol}$ , 83%).

$\nu_{\text{max}}/\text{cm}^{-1}$  2955, 2871, 1473, 1444, 1373, 1364, 1237, 1223, 1153, 1130, 1093, 963, 906, 875, 755.

$\delta_{\text{H}}$  (300 MHz,  $\text{CDCl}_3$ ) 7.18 (1H, d,  $J$  2.5 Hz, Ar-H), 6.95 (1H, d,  $J$  2.5 Hz, Ar-H), 2.90 (1H, ddd,  $J$  16.7, 13.0, 6.3 Hz,  $\text{CHHCH}_2$ ), 2.76 (1H, ddd,  $J$  16.7, 6.2, 1.8 Hz,  $\text{CHHCH}_2$ ), 1.99 (1H, td,  $J$  13.0, 6.2 Hz,  $\text{CH}_2\text{CHH}$ ), 1.75 (1H, ddd,  $J$  13.0, 6.3 Hz, 1.8,  $\text{CH}_2\text{CHH}$ ), 1.43 (9H, s,  $\text{C}(\text{CH}_3)_3$ ), 1.32 (9H, s,  $\text{C}(\text{CH}_3)_3$ ), 1.21 (3H, s,  $\text{CH}_3$ ), 1.13 (9H, s,  $\text{C}(\text{CH}_3)_3$ ).

$\delta_{\text{C}}$  (75 MHz,  $\text{CDCl}_3$ ) 150.6 (C), 140.9 (C), 137.2 (C), 124.3 (CH), 121.9 (CH), 120.2 (CH), 80.7 (C), 38.1 (C), 35.2 (C), 34.3 (C), 31.8 ( $\text{CH}_3$ ), 30.0 ( $\text{CH}_3$ ), 25.8 ( $\text{CH}_3$ ), 25.6 ( $\text{CH}_2$ ), 23.4 ( $\text{CH}_2$ ), 17.0 ( $\text{CH}_3$ ).

Found (APCI<sup>+</sup>)  $[\text{M}]^+$  316.2754,  $\text{C}_{22}\text{H}_{36}\text{O}$  requires 316.2761.

elchb056a  
 1H 300.1MHz Job 25906 Coutant Eloi B056A CDCl3 24.9°C  
 A fraction - Me/tBu AA + 5eq 2,4-di(tBu)phenol, 60C, over w-e

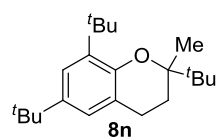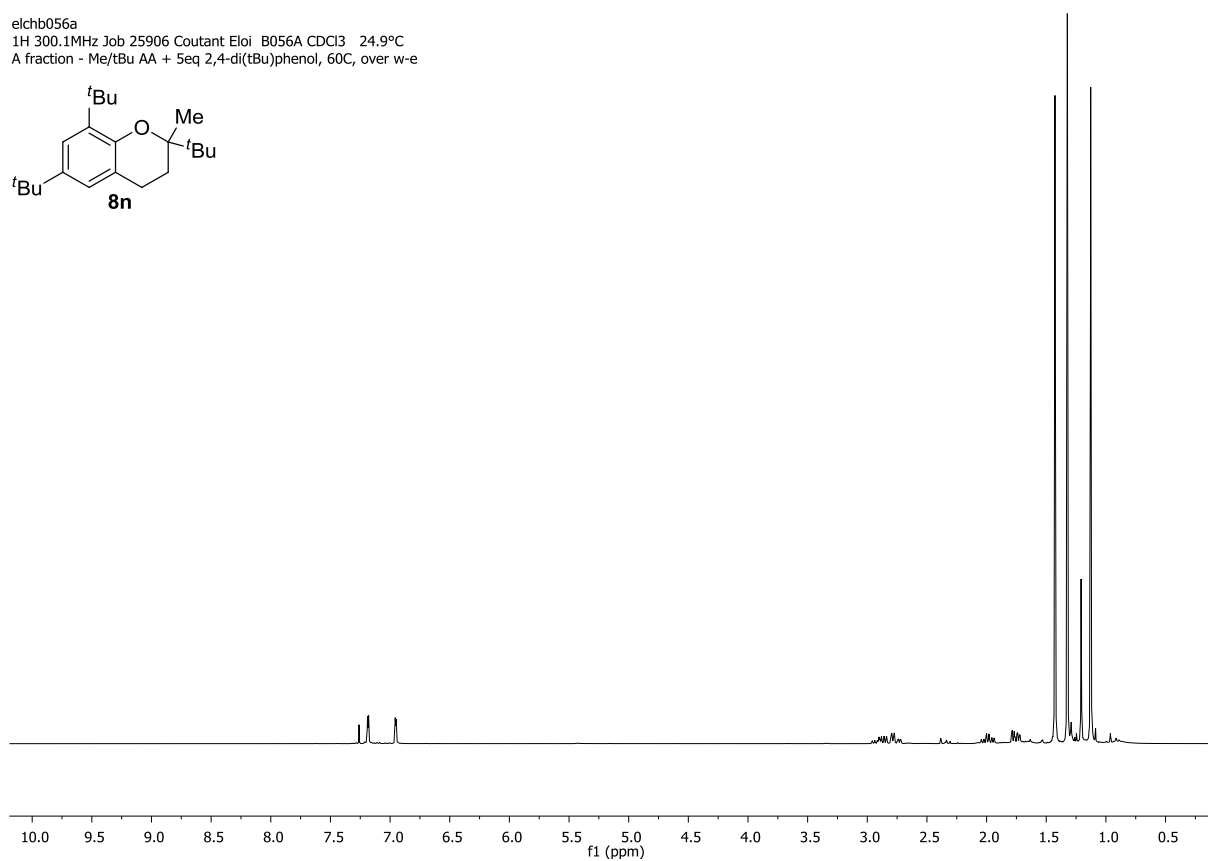

elccb056a  
 13C 75.5MHz Job 25918 Coutant Eloi B056A CDCl3 25.0°C 0 hour 18 min  
 A fraction - Me/tBu AA + 5eq 2,4-di(tBu)phenol, 60C, over w-e

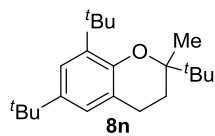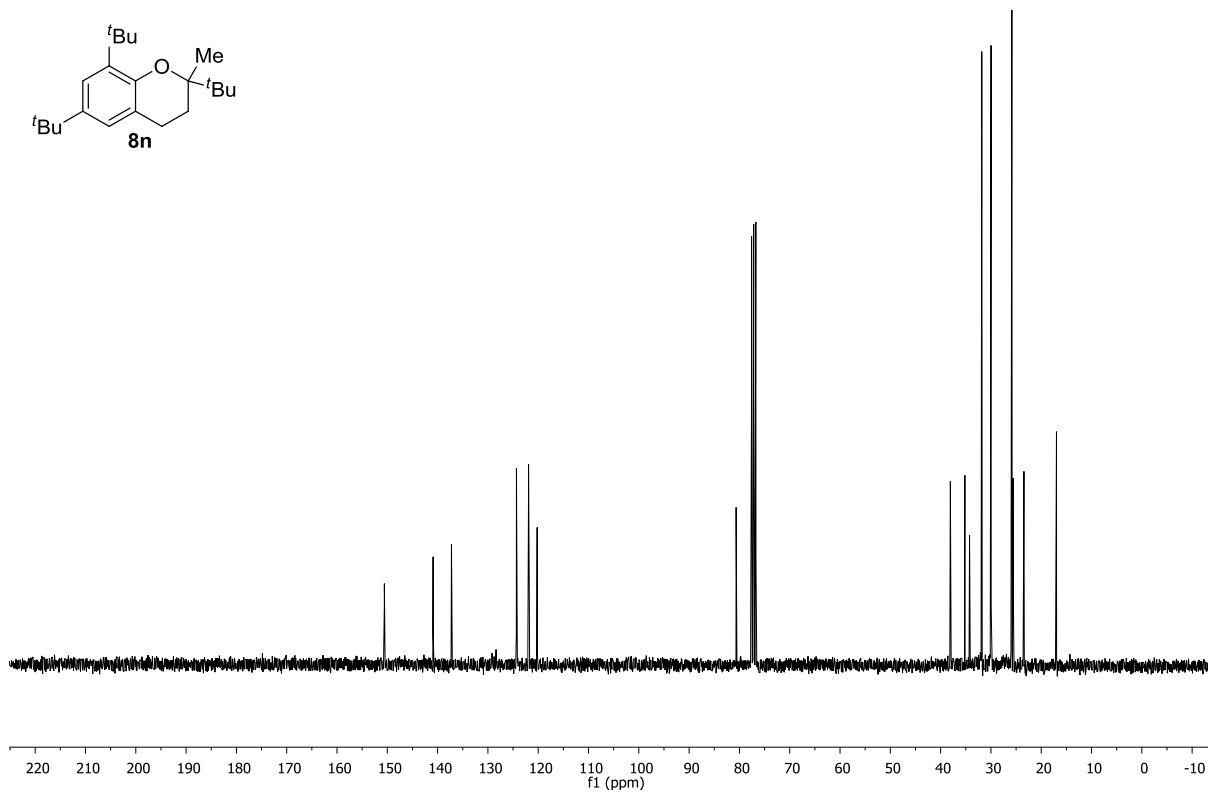

## 6,8-Di-*tert*-butyl-2,2-dimethylchroman (**8o**)

With a tertiary allylic alcohol:

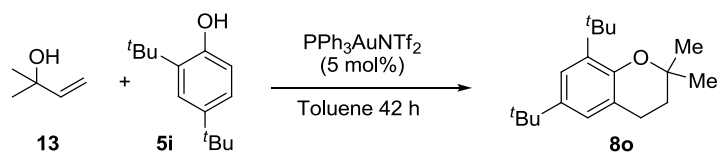

2-Methylbut-3-en-2-ol (**13**, 15.1 mg, 175  $\mu\text{mol}$ ) and 2,4-di-*tert*-butylphenol (**5j**, 182 mg, 880  $\mu\text{mol}$ ) were dissolved in toluene (0.36 mL).  $\text{PPh}_3\text{AuNTf}_2$  (as the 2:1 toluene adduct) (6.4 mg, 8.7  $\mu\text{mol}$ ) was added to the resulting solution. The reaction was allowed to stir at 60 °C for 42 hours. The reaction was then filtered over a plug of silica, using diethyl ether as eluent. The crude mixture was purified using column chromatography, using neat hexane as eluent. Product **8o** was obtained as a colourless oil (30.6 mg, 112  $\mu\text{mol}$ , 64%).

With a primary allylic alcohol:

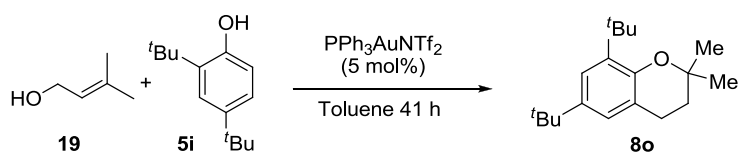

3-Methylbut-2-en-1-ol (**19**, 15.2 mg, 177  $\mu\text{mol}$ ) and 2,4-di-*tert*-butylphenol (**5j**, 181 mg, 876  $\mu\text{mol}$ ) were dissolved in toluene (0.36 mL).  $\text{PPh}_3\text{AuNTf}_2$  (as the 2:1 toluene adduct) (6.4 mg, 8.7  $\mu\text{mol}$ ) was added to the resulting solution. The reaction was allowed to stir at 60 °C for 41 hours. The reaction was then filtered over a plug of silica, using diethyl ether as eluent. The crude product was purified using column chromatography, using neat hexane as eluent. Product **8o** was obtained as a colourless oil (37.6 mg, 137.0  $\mu\text{mol}$ , 78%).

$\nu_{\text{max}}/\text{cm}^{-1}$  2952, 2868, 1478, 1444, 1415, 1389, 1382, 1361, 1251, 1238, 1221, 1203, 1158, 1127, 940, 894, 876, 759, 752.

$\delta_{\text{H}}$  (300 MHz,  $\text{CDCl}_3$ ) 7.17 (1H, d,  $J$  2.5 Hz, Ar-H), 6.94 (1H, d,  $J$  2.5 Hz, Ar-H), 2.81 (2H, t,  $J$  6.8 Hz,  $\text{CH}_2$ ), 1.80 (2H, t,  $J$  6.8 Hz,  $\text{CH}_2$ ), 1.41 (9H, s,  $\text{C}(\text{CH}_3)_3$ ), 1.38 (6H, s,  $\text{C}(\text{CH}_3)_2$ ), 1.32 (9H, s,  $\text{C}(\text{CH}_3)_3$ ).

$\delta_{\text{C}}$  (75 MHz,  $\text{CDCl}_3$ ) 150.3 (C), 140.9 (C), 136.9 (C), 124.2 (C), 121.8 (CH), 119.9 (C), 73.8 (C), 35.1 (C), 34.3 (C), 33.0 ( $\text{CH}_2$ ), 31.8 ( $\text{CH}_3$ ), 30.0 ( $\text{CH}_3$ ), 27.3 ( $\text{CH}_3$ ), 23.5 ( $\text{CH}_2$ ).

Found (APCI+)  $[\text{M}]^+$  274.2287,  $\text{C}_{19}\text{H}_{30}\text{O}$  requires 274.2291.

elchb069a  
 1H 300.1MHz Job 26551 Coutant Eloi B069A CDCl3 25.0°C  
 A fraction - SN2 or SN2' cyclised chroman?

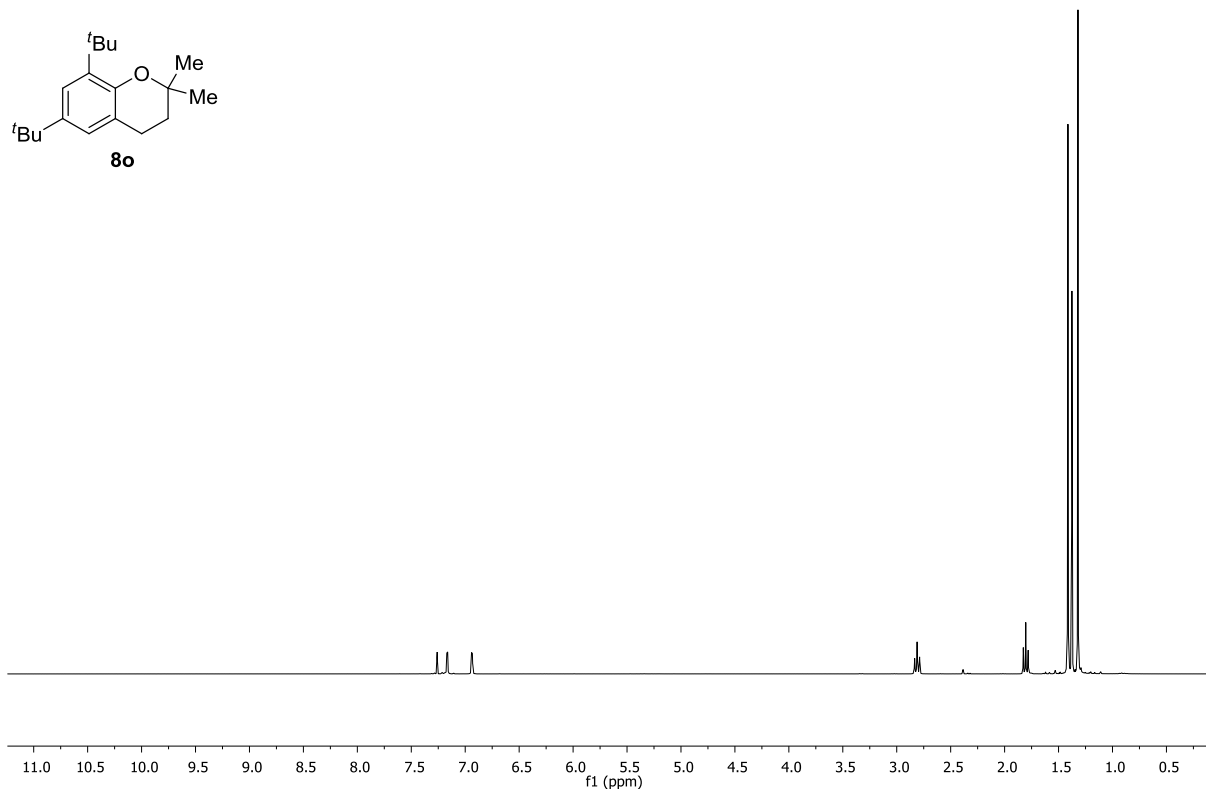

elccb069a  
 13C 75.5MHz Job 26559 Coutant Eloi B069A CDCl3 25.0°C 0 hour 18 min  
 A fraction - SN2 or SN2' cyclised chroman?

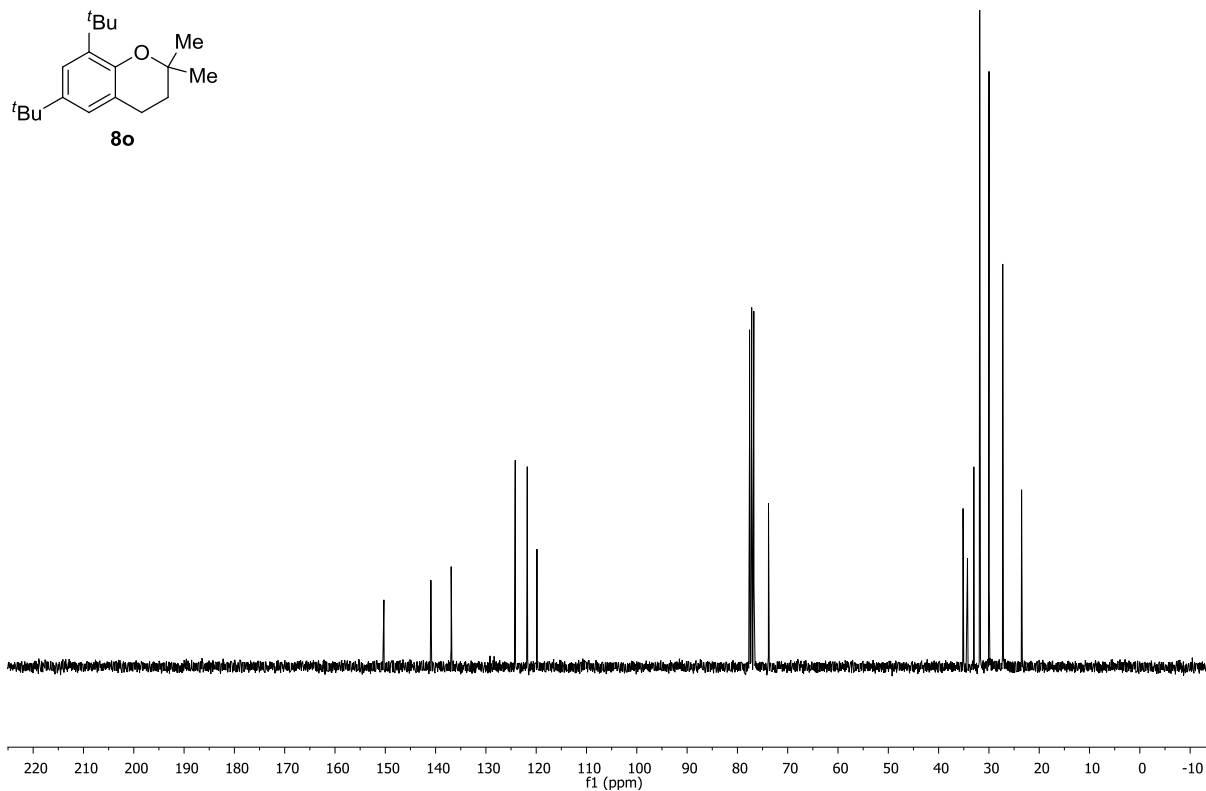

## 6,8-Di-*tert*-butylspiro[chroman-2,1'-cyclohexane] (**8p**)

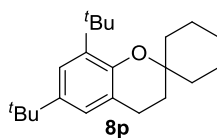

1-Vinylcyclohexanol (**14**, 20.2 mg, 160  $\mu\text{mol}$ ) and the 2,4-di-*tert*-butylphenol (**5j**, 164 mg, 792  $\mu\text{mol}$ ) were dissolved in toluene (0.34 mL).  $\text{PPh}_3\text{AuNTf}_2$  (as the 2:1 toluene adduct) (5.9 mg, 7.9  $\mu\text{mol}$ ) was added to the resulting solution. The reaction was allowed to stir at 60  $^\circ\text{C}$  for 41 hours. The reaction was then filtered over a plug of silica, using diethyl ether as eluent. The crude product was purified using column chromatography, using a gradient eluent system of neat hexane to 9:1 hexane:diethyl ether. Product **8p** was obtained as an off-white oil in approx. 85% purity (30.6 mg, 97.3  $\mu\text{mol}$ , 61%).

$\nu_{\text{max}}/\text{cm}^{-1}$  2933, 2863, 1477, 1461, 1444, 1361, 1230, 1203, 1161, 1148, 1128, 975, 944, 876, 755.

$\delta_{\text{H}}$  (300 MHz,  $\text{CDCl}_3$ ) 7.17 (1H, d,  $J$  2.5 Hz, Ar-H), 6.92 (1H, d,  $J$  2.5 Hz, Ar-H), 2.77 (1H, t,  $J$  6.8 Hz,  $\text{CH}_2$ ), 1.79 (2H, t,  $J$  6.8 Hz,  $\text{CH}_2$ ), 1.91–1.47 (10H, m,  $\text{C}(\text{CH}_3)_5$ ).

$\delta_{\text{C}}$  (75 MHz,  $\text{CDCl}_3$ ) 150.2 (C), 140.6 (C), 136.6 (C), 124.4 (CH), 122.0 (CH), 120.3 (C), 75.3 (C), 36.0 ( $2 \times \text{CH}_2$ ), 35.3 (C), 34.2 (C), 31.8 ( $\text{CH}_3$ ), 30.2 ( $\text{CH}_3$ ), 22.8 ( $\text{CH}_2$ ), 22.2 ( $2 \times \text{CH}_2$ ).

Found (APCI $^+$ )  $[\text{M} + \text{H}]^+$  315.2678,  $\text{C}_{22}\text{H}_{35}\text{O}$  requires 315.2682.

elchd061a  
1H 300.1MHz Job 27360 Coutant Eloi d061a CDCl3 25.2°C

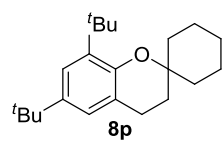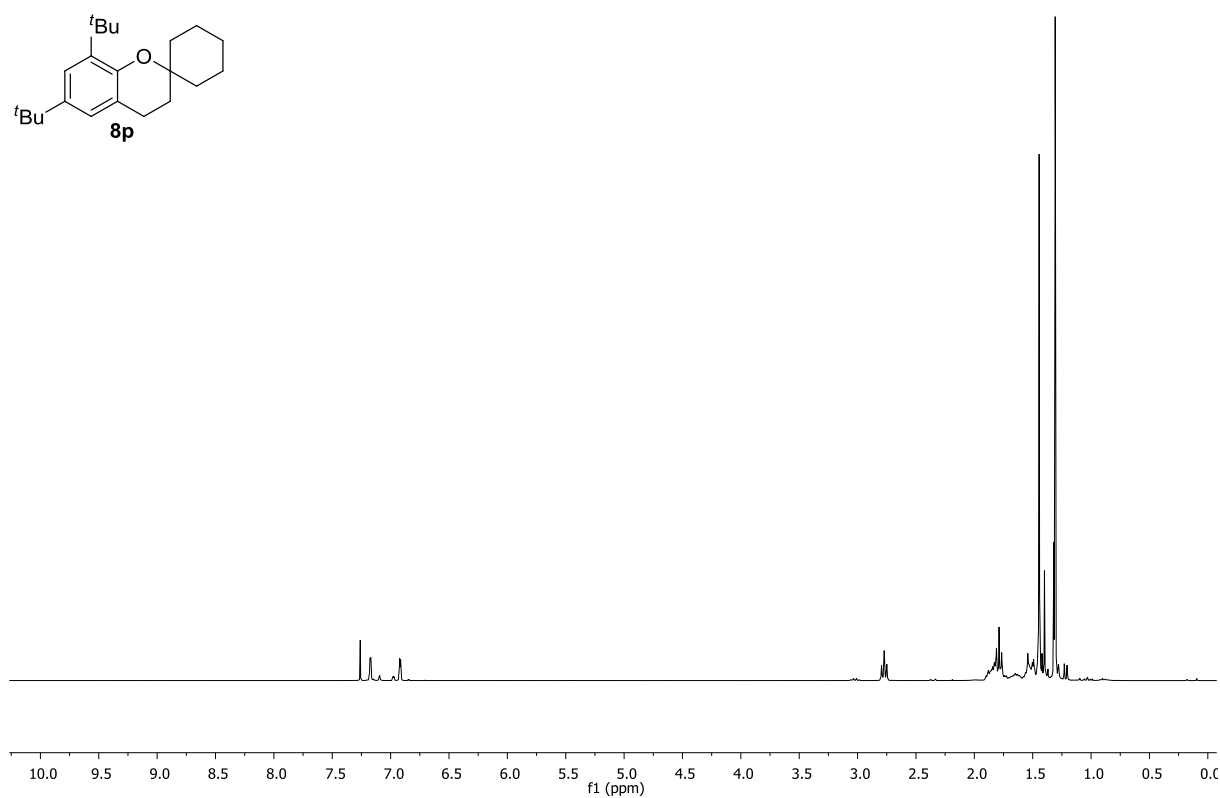

elchd061a  
13C 75.5MHz Job 27363 Coutant Eloi d061a CDCl3 8 hours 16 min 25.2°C

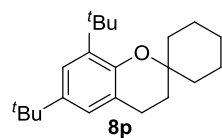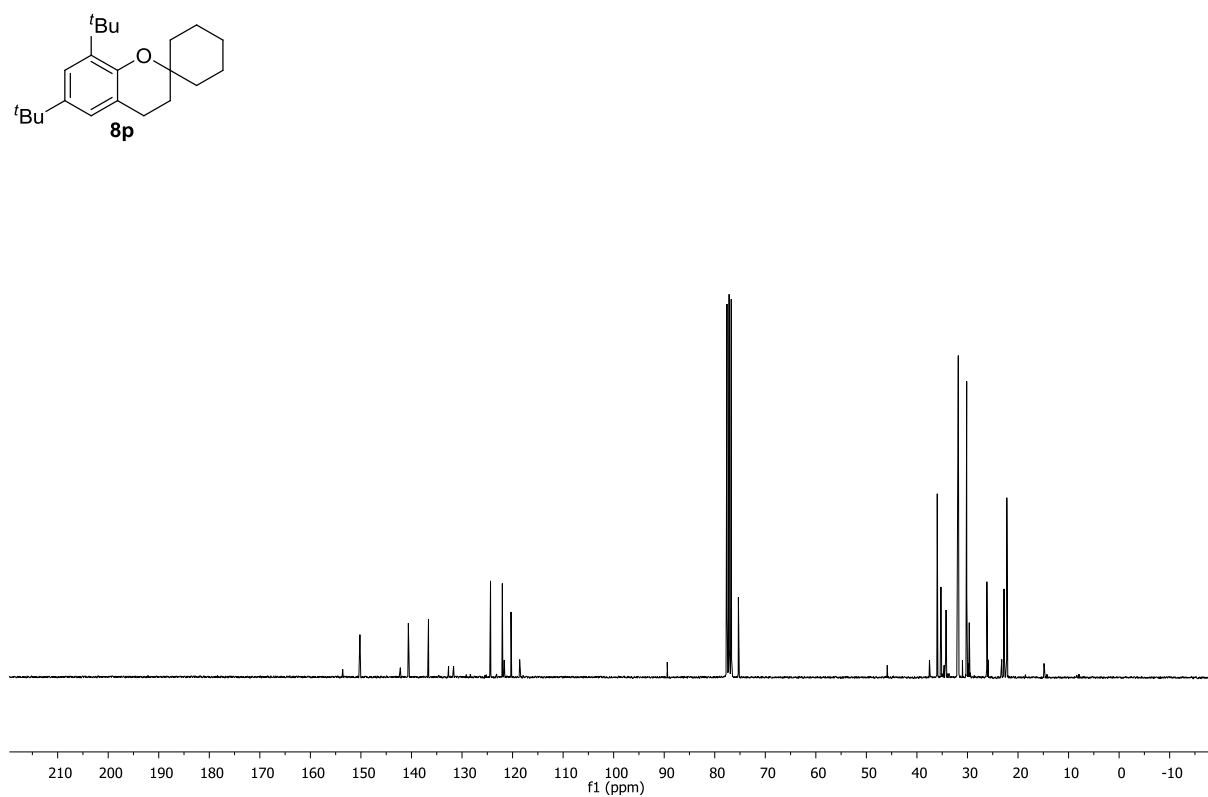

## 6,8-Di-*tert*-butyl-2-methyl-2-phenylchroman (**8q**)

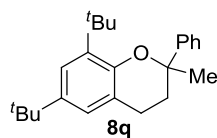

2-Phenylbut-3-en-2-ol (**15**, 20.0 mg, 135  $\mu\text{mol}$ ) and the 2,4-di-*tert*-butylphenol (**5j**, 141 mg, 683  $\mu\text{mol}$ ) were dissolved in toluene (0.29 mL).  $\text{PPh}_3\text{AuNTf}_2$  (as the 2:1 toluene adduct) (5.0 mg, 6.8  $\mu\text{mol}$ ) was added to the resulting solution. The reaction was allowed to stir at 70  $^\circ\text{C}$  for 41 hours. The reaction was then filtered over a plug of silica, using diethyl ether as eluent. The crude product was purified using column chromatography; using a gradient eluent system of neat hexane to 75:1 hexane:diethyl ether. Product **8q** was obtained as a colourless oil (30.1 mg, 89.5  $\mu\text{mol}$ , 66%).

$\nu_{\text{max}}/\text{cm}^{-1}$  2952, 2867, 1474, 1444, 1361, 1232, 1203, 1158, 1130, 1067, 946, 878, 763, 754, 698.

$\delta_{\text{H}}$  (300 MHz,  $\text{CDCl}_3$ ) 7.47–7.24 (6H, m,  $\text{CC}_6\text{H}_5$ ), 7.23 (1H, d,  $J$  2.5 Hz, Ar-H), 6.87 (1H, d,  $J$  2.5 Hz, Ar-H), 2.70 (1H, dt,  $J$  16.3, 5.5 Hz,  $\text{CHHCH}_2$ ), 2.52 (1H, ddd,  $J$  16.3, 8.9, 6.4 Hz,  $\text{CHHCH}_2$ ), 2.25 (1H, ddd,  $J$  13.4, 6.4, 5.5 Hz,  $\text{CH}_2\text{CHH}$ ), 2.04 (1H, ddd,  $J$  13.4, 8.9, 5.5 Hz,  $\text{CH}_2\text{CHH}$ ), 1.70 (3H, s,  $\text{CH}_3$ ), 1.51 (9H, s,  $\text{C}(\text{CH}_3)_3$ ), 1.31 (9H, s,  $\text{C}(\text{CH}_3)_3$ ).

$\delta_{\text{C}}$  (75 MHz,  $\text{CDCl}_3$ ) 150.3 (C), 146.9 (C), 141.3 (C), 136.5 (C), 128.3 (CH), 126.7 (CH), 125.1 (CH), 124.2 (CH), 122.1 (CH), 120.6 (C), 79.0 (C), 35.3 ( $\text{CH}_2$ ), 34.3 (C), 34.2 (C), 31.8 ( $\text{CH}_3$ ), 30.2 ( $\text{CH}_3$ ), 28.5 ( $\text{CH}_3$ ), 23.7 ( $\text{CH}_2$ ).

Found (APCI<sup>+</sup>)  $[\text{M} + \text{H}]^+$  337.2525,  $\text{C}_{24}\text{H}_{33}\text{O}$  requires 337.2526.

elchb076b  
 1H 300.1MHz Job 26890 Coutant Eloi B076B CDCl3 25.0°C  
 B fraction - Ph/Me AA + di(tBu)phenol, 70C, 2d

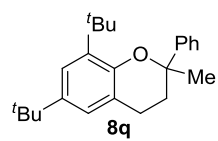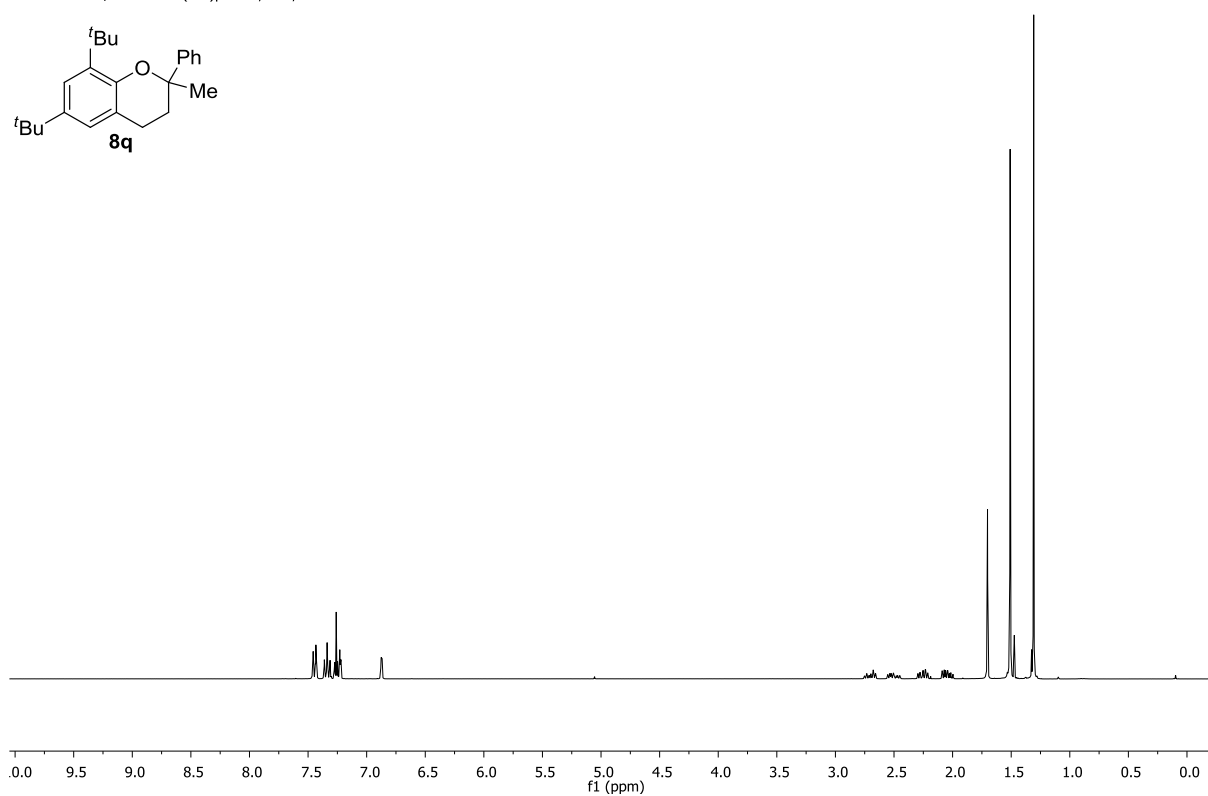

elccb076b  
 13C 75.5MHz Job 26904 Coutant Eloi B076B CDCl3 25.0°C 0 hour 36 min  
 B fraction - Ph/Me AA + di(tBu)phenol, 70C, 2d

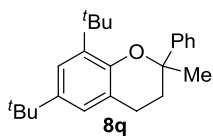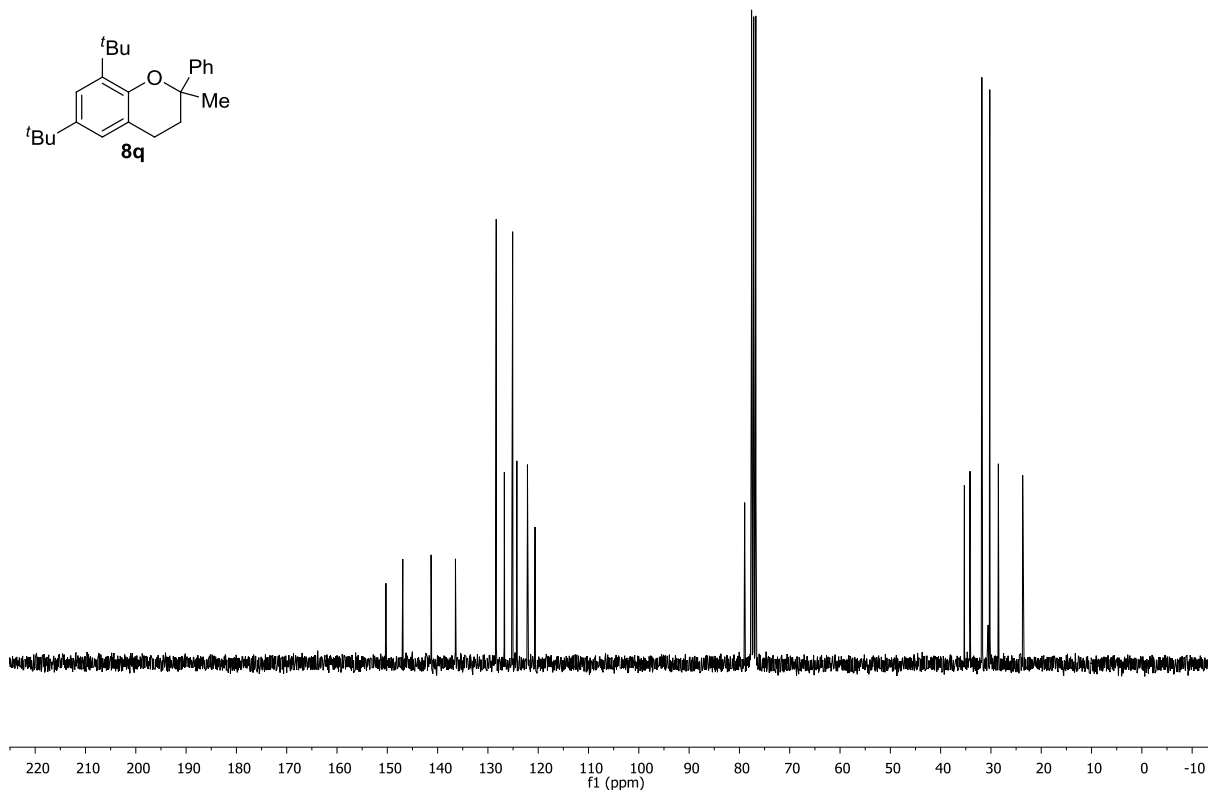



## 6,8-Di-*tert*-butyl-2,2-dibutyl-4-methylchroman (**8r**)

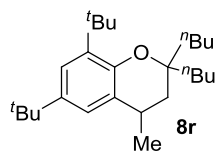

5-(Prop-1-en-1-yl)nonan-5-ol (**16**, 19.8 mg, 107  $\mu$ mol) and 2,4-di-*tert*-butylphenol (**5j**, 112 mg, 540  $\mu$ mol) were dissolved in toluene (0.23 mL).  $\text{PPh}_3\text{AuNTf}_2$  (as the 2:1 toluene adduct) (4.1 mg, 5.5  $\mu$ mol) was added to the resulting solution. The reaction was allowed to stir at 70  $^\circ\text{C}$  for 43 hours. The reaction was then filtered over a plug of silica, using diethyl ether as eluent. The crude product was purified using column chromatography, using a gradient eluent system of neat hexane to 125:1 hexane:diethyl ether. Product **8r** was obtained as a colourless oil (17.9 mg, 48.0  $\mu$ mol, 45%).

$\nu_{\text{max}}/\text{cm}^{-1}$  2955, 2937, 2864, 1467, 1439, 1361, 1294, 1232, 1217, 1203, 1136, 985, 877, 756.

$\delta_{\text{H}}$  (300 MHz,  $\text{CDCl}_3$ ) 7.16 (1H, d,  $J$  2.4 Hz, Ar-H), 7.12 (1H, d,  $J$  2.4 Hz, Ar-H), 3.03–2.76 (1H, m,  $\text{CHCH}_2$ ), 1.84 (1H, dd,  $J$  13.5, 5.7 Hz,  $\text{CHCHH}$ ), 1.71–1.41 (9H, m,  $\text{CHCHH}$  and  $2\times(\text{CH}_2)_2\text{CH}_2\text{CH}_3$ ), 1.39 (9H, s,  $\text{C}(\text{CH}_3)_3$ ), 1.30 (9H, s,  $\text{C}(\text{CH}_3)_3$ ), 1.29–1.22 (4H, m,  $2\times(\text{CH}_2)_2\text{CH}_2\text{CH}_3$ ), 0.97–0.88 (6H, m,  $2\times(\text{CH}_2)_2\text{CH}_2\text{CH}_3$ ).

$\delta_{\text{C}}$  (75 MHz,  $\text{CDCl}_3$ ) 149.7 (C), 140.5 (C), 136.6 (C), 125.6 (C), 122.0 (CH), 121.6 (CH), 78.5 (C), 39.4 ( $\text{CH}_2$ ), 38.4 ( $\text{CH}_2$ ), 35.2 (C), 34.6 (C), 34.5 ( $\text{CH}_2$ ), 31.9 ( $\text{CH}_3$ ), 30.1 ( $\text{CH}_3$ ), 26.5 ( $\text{CH}_2$ ), 26.3 (CH), 25.6 ( $\text{CH}_2$ ), 23.49 ( $\text{CH}_2$ ), 23.45 ( $\text{CH}_2$ ), 21.1 ( $\text{CH}_3$ ), 14.33 ( $\text{CH}_3$ ), 14.28 ( $\text{CH}_3$ ).

Found (APCI<sup>+</sup>)  $[\text{M} + \text{H}]^+$  373.3464,  $\text{C}_{26}\text{H}_{45}\text{O}$  requires 337.3465.

elchc068a  
 1H 300.1MHz Job 26511 Coutant Eloï C068A CDCl3 24.9°C  
 2,2-dibutyl-4-methyl-6,8-di-tert-butylchroman

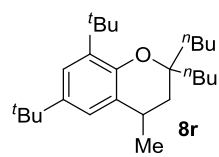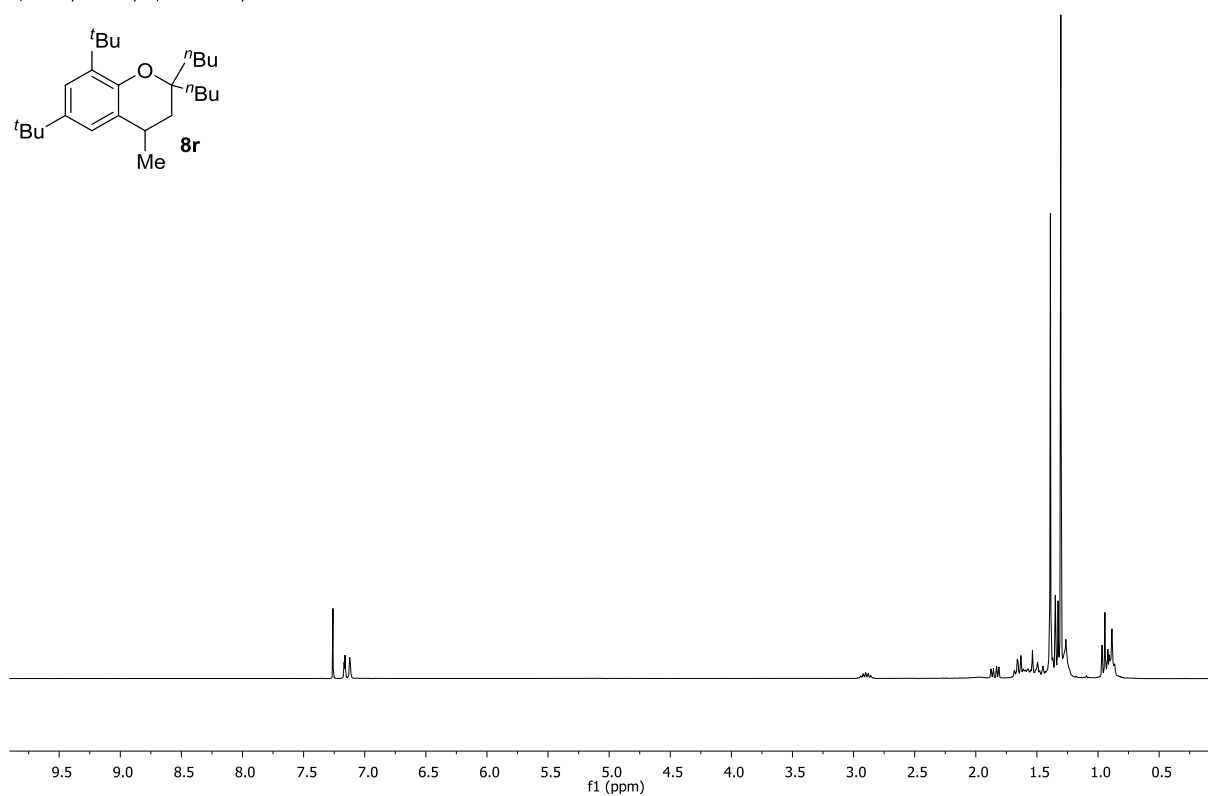

elccc068a  
 13C 75.5MHz Job 26520 Coutant Eloï C068A CDCl3 25.0°C 2 hours 43 min  
 2,2-dibutyl-4-methyl-6,8-di-tert-butylchroman

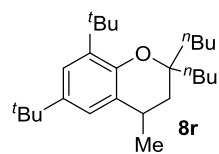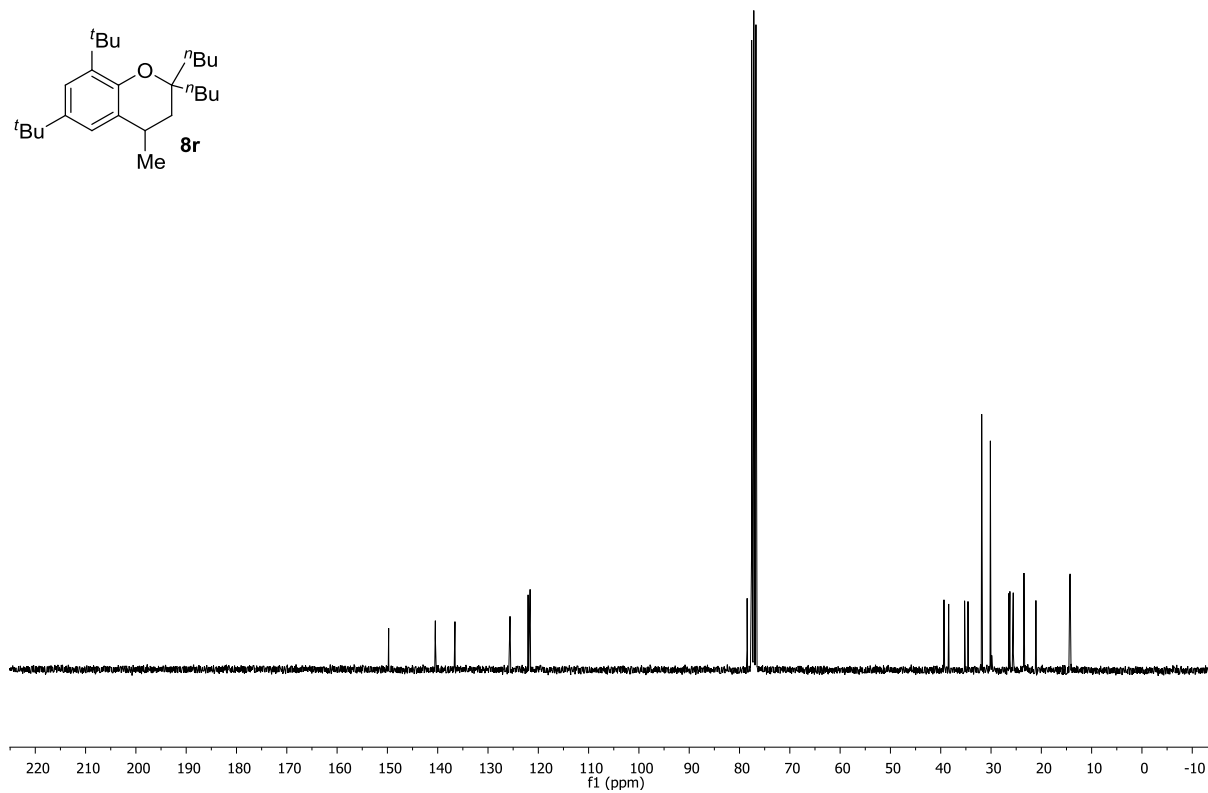

## 6,8-Di-*tert*-butyl-2-butyl-2,4-dimethylchroman (**8s**)

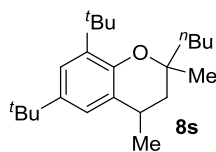

4-Methyloct-2-en-4-ol (**17**, 20.6 mg, 145  $\mu$ mol) and the 2,4-di-*tert*-butylphenol (**5j**, 145 mg, 704  $\mu$ mol) were dissolved in toluene (0.30 mL).  $\text{PPh}_3\text{AuNTf}_2$  (as the 2:1 toluene adduct) (5.3 mg, 7.2  $\mu$ mol) was added to the resulting solution. The reaction was allowed to stir at 70  $^\circ\text{C}$  for 47 hours. The reaction was then filtered over a plug of silica, using diethyl ether as eluent. The crude product was isolated as an inseparable mixture of diastereoisomers by column chromatography, using a gradient eluent system of neat hexane to 125:1 hexane:diethyl ether. Product **8s** (mixture of diastereomers, approx. 2:1 ratio) was obtained as a colourless oil (22.8 mg, 69.0  $\mu$ mol, 48%).

The following characterisation is on the ~2:1 diastereomeric mixture.

$\nu_{\text{max}}/\text{cm}^{-1}$  2955, 2933, 2867, 1467, 1440, 1389, 1378, 1361, 1296, 1233, 1207, 1138, 876.

$\delta_{\text{H}}$  (300 MHz,  $\text{CDCl}_3$ ) 7.23–7.12 (4H, m, Ar-H + Ar-H'), 3.07–2.83 (2H, m,  $(\text{CH}_3)\text{CH}$  +  $(\text{CH}_3)\text{CH}'$ ), 1.95 (2H, dd,  $J$  13.5, 5.8 Hz,  $\text{CHH}$  +  $\text{CHH}'$ ), 1.76 (2H, dd,  $J$  13.5, 5.8 Hz,  $\text{CHH}$  +  $\text{CHH}'$ ), 1.72–1.41 (12H, m,  $(\text{CH}_2)_3\text{CH}_3$  +  $(\text{CH}_2)_3\text{CH}_3'$ ), 1.40 (9H, s,  $\text{C}(\text{CH}_3)_3$ ), 1.40 (9H, s,  $\text{C}(\text{CH}_3)_3'$ ), 1.39 (3H, s,  $\text{CH}_3$ ), 1.36 (3H, d,  $J$  6.7 Hz,  $\text{CH}(\text{CH}_3)$ ), 1.35 (3H, d,  $J$  6.7 Hz,  $\text{CH}(\text{CH}_3)'$ ), 1.32 (18H, s,  $\text{C}(\text{CH}_3)_3$  +  $\text{C}(\text{CH}_3)_3'$ ), 1.23 (3H, s,  $\text{CH}_3'$ ), 0.96 (3H, t,  $J$  7.2 Hz,  $(\text{CH}_2)_3\text{CH}_3$ ), 0.90 (3H, t,  $J$  7.2 Hz,  $(\text{CH}_2)_3\text{CH}_3'$ ).

$\delta_{\text{C}}$  (75 MHz,  $\text{CDCl}_3$ ) 149.9 (C), 149.7 (C'), 140.7 (C), 140.6 (C'), 136.7 (C), 136.6 (C'), 125.6 (C'), 125.5 (C), 122.0 (CH'), 121.9 (CH), 121.7 (CH), 121.6 (CH'), 76.5 (C'), 76.0 (C), 43.3 ( $\text{CH}_2$ ), 40.8 ( $\text{CH}_2$ ), 40.5 ( $\text{CH}_2'$ ), 37.6 ( $\text{CH}_2'$ ), 35.2 (C + C'), 34.5 (C + C'), 31.9 ( $\text{CH}_3$  +  $\text{CH}_3'$ ), 30.2 ( $\text{CH}_3'$ ), 30.1 ( $\text{CH}_3$ ), 27.3 ( $\text{CH}_3'$ ), 26.8 ( $\text{CH}_2'$ ), 26.7 (CH), 26.6 (CH'), 26.0 ( $\text{CH}_2$ ), 23.5 ( $\text{CH}_2$  +  $\text{CH}_2'$ ), 22.6 ( $\text{CH}_3$ ), 21.1 ( $\text{CH}_3'$  +  $\text{CH}_3$ ), 14.3 ( $\text{CH}_3'$  +  $\text{CH}_3$ ).

Found (APCI<sup>+</sup>)  $[\text{M} + \text{H}]^+$  331.2994,  $\text{C}_{23}\text{H}_{39}\text{O}$  requires 331.2995.

elchb073a  
 1H 300.1MHz Job 26722 Coutant Eloi B073A CDCl3 25.0°C  
 2-butyl-2-methyl-6,8-di-tert-butylchroman ?

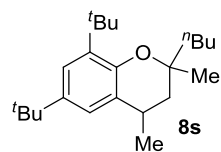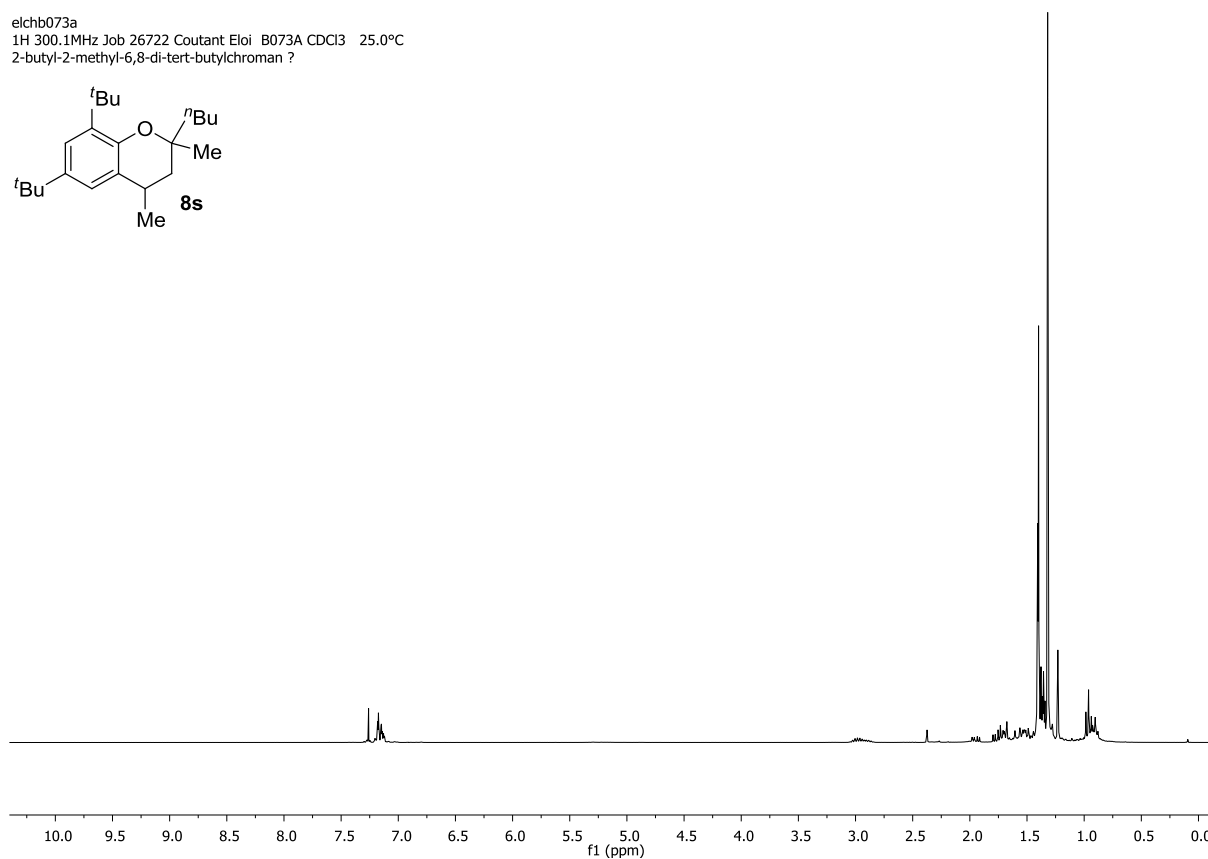

elccb073a  
 13C 75.5MHz Job 26739 Coutant Eloi B073A CDCl3 25.0°C 0 hour 36 min  
 2-butyl-2-methyl-6,8-di-tert-butylchroman ?

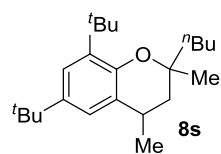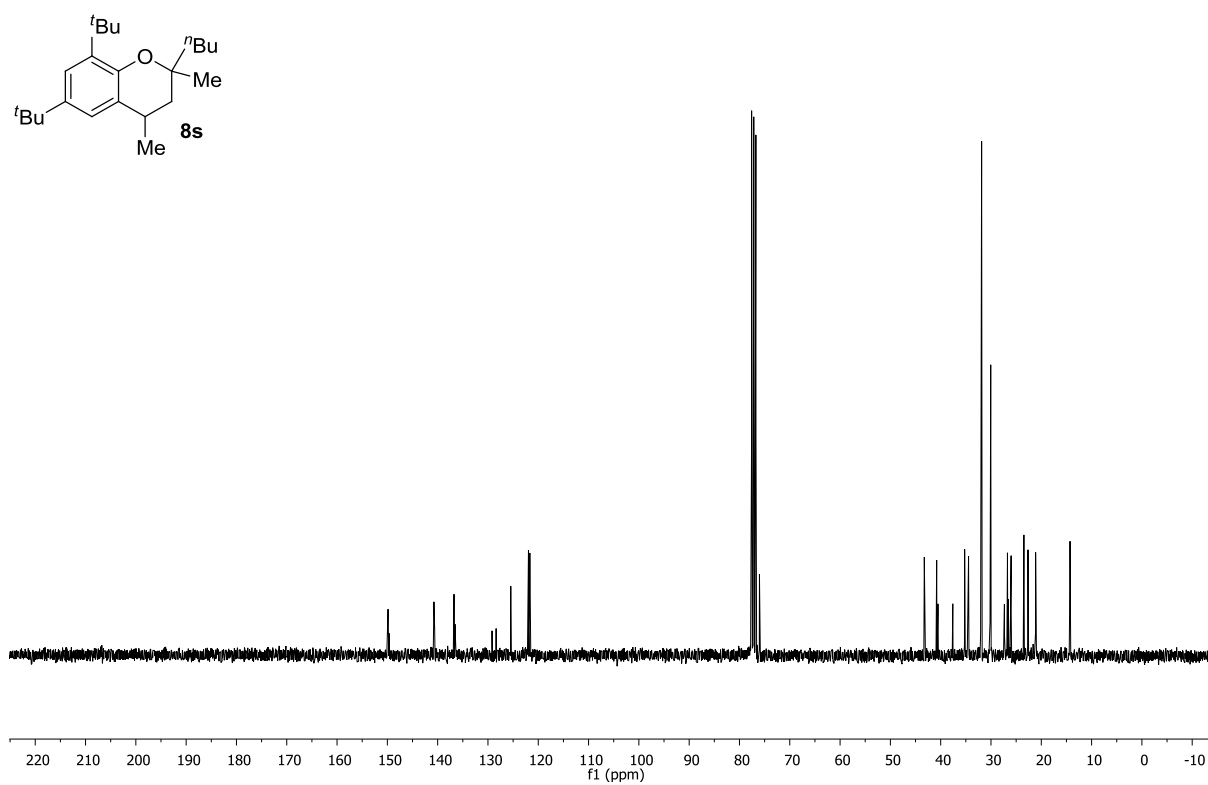

## 2,4-Di-*tert*-butyl-6-(3-butyl-2-methylhept-2-en-1-yl)phenol (**9t**)

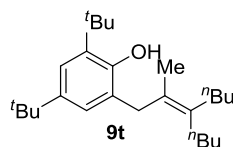

5-(Prop-1-en-2-yl)nonan-5-ol (**18**, 19.5 mg, 106  $\mu$ mol) and 2,4-di-*tert*-butylphenol (**5j**, 112 mg, 540  $\mu$ mol) were dissolved in toluene (0.23 mL).  $\text{PPh}_3\text{AuNTf}_2$  (as the 2:1 toluene adduct) (4.0 mg, 5.4  $\mu$ mol) was added to the resulting solution. The reaction was allowed to stir at 60  $^\circ\text{C}$  for 42 hours. The reaction was then filtered over a plug of silica, using diethyl ether as eluent. The crude product was purified using column chromatography, using a gradient eluent system of neat hexane to 10:1 hexane:diethyl ether. Product **9t** was obtained as a colourless oil (13.6 mg, 36.5  $\mu$ mol, 35%).

$\nu_{\text{max}}/\text{cm}^{-1}$  3445, 2956, 2933, 2871, 1479, 1459, 1362, 1216, 1201, 756, 735.

$\delta_{\text{H}}$  (300 MHz,  $\text{CDCl}_3$ ) 7.17 (1H, d,  $J$  2.5 Hz, Ar-H), 6.94 (1H, d,  $J$  2.5 Hz, Ar-H), 5.48 (1H, s, O-H), 3.42 (2H, s,  $\text{CH}_2\text{C}(\text{CH}_3)=\text{C}$ ), 2.26–2.19 (2H, m,  $=\text{CCH}_2(\text{CH}_2)_2\text{CH}_3$ ), 2.15–2.08 (2H, m,  $=\text{CCH}_2(\text{CH}_2)_2\text{CH}_3$ ), 1.57 (3H, s,  $=\text{CCH}_3$ ), 1.40 (9H, s,  $\text{C}(\text{CH}_3)_3$ ), 1.45–1.27 (8H, m,  $2\times\text{CH}_2(\text{CH}_2)_2\text{CH}_3$ ), 1.29 (9H, s,  $\text{C}(\text{CH}_3)_3$ ), 0.93 (3H, t,  $J$  7.0 Hz,  $(\text{CH}_2)_3\text{CH}_3$ ), 0.92 (3H, t,  $J$  7.1 Hz,  $(\text{CH}_2)_3\text{CH}_3$ ).

$\delta_{\text{C}}$  (75 MHz,  $\text{CDCl}_3$ ) 151.9 (C), 141.8 (C), 138.2 (C), 135.4 (C), 126.4 (C), 125.4 (CH), 125.0 (C), 122.1 (CH), 36.8 ( $\text{CH}_2$ ), 35.0 (C), 34.4 (C), 32.6 ( $\text{CH}_2$ ), 32.4 ( $\text{CH}_2$ ), 31.8 ( $\text{CH}_3$ ), 31.4 ( $\text{CH}_2$ ), 31.0 ( $\text{CH}_2$ ), 29.9 ( $\text{CH}_3$ ), 23.2 ( $\text{CH}_2$ ), 23.1 ( $\text{CH}_2$ ), 17.5 ( $\text{CH}_3$ ), 14.2 ( $2\times\text{CH}_3$ ).

Found (APCI $^+$ )  $[\text{M} - \text{H}]^+$  371.3302,  $\text{C}_{26}\text{H}_{43}\text{O}$  requires 371.3308.

elchb067b  
 1H 300.1MHz Job 26549 Coutant Eloi B067B CDCl3 24.8°C  
 B fraction - Bu/Bu beta-methyl-substituted AA

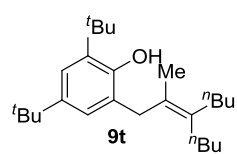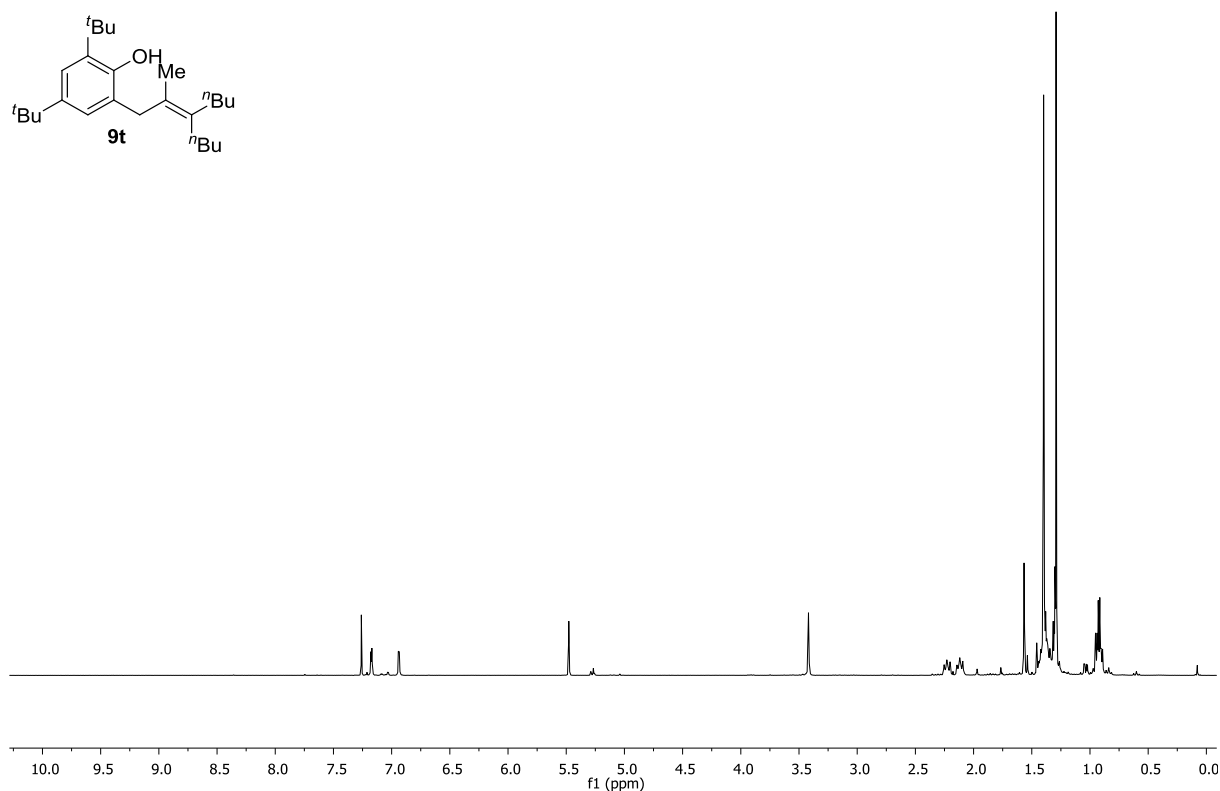

elccb067b  
 13C 75.5MHz Job 26558 Coutant Eloi B067B CDCl3 25.0°C 2 hours 7 min  
 B fraction - Bu/Bu beta-methyl-substituted AA

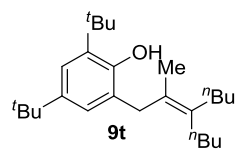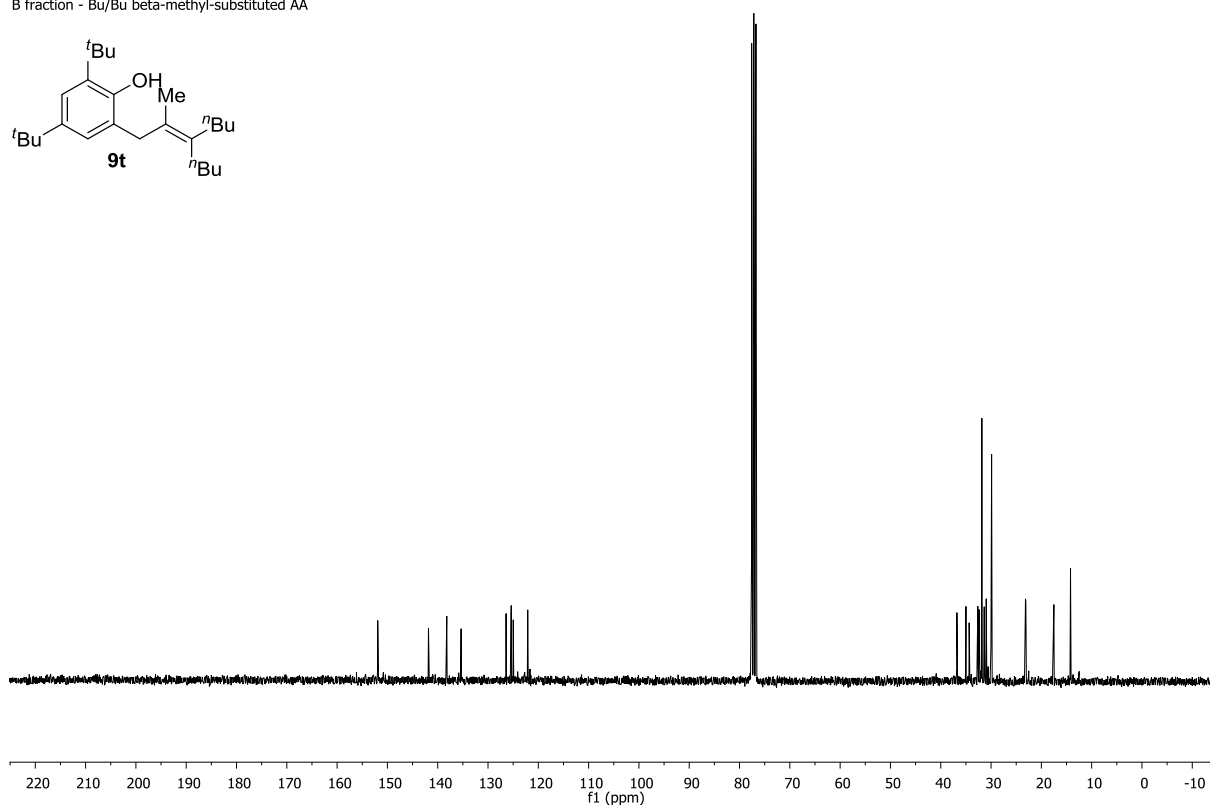

## 6,8-Di-*tert*-butyl-2,2,4-trimethylchroman (**8u**)

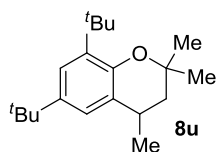

4-Methylprop-3-en-2-ol (**20**, 9.8 mg, 97.8  $\mu$ mol) and the 2,4-di-*tert*-butylphenol (**5j**, 105 mg, 509  $\mu$ mol) were dissolved in toluene (0.21 mL).  $\text{PPh}_3\text{AuNTf}_2$  (as the 2:1 toluene adduct) (3.6 mg, 4.9  $\mu$ mol) was added to the resulting solution. The reaction was allowed to stir at 70  $^\circ\text{C}$  for 42 hours. The reaction was then filtered over a plug of silica, using diethyl ether as eluent. The crude product was purified using column chromatography, using neat hexane as eluent. Product **8u** was obtained as a colourless oil (14.3 mg, 49.6  $\mu$ mol, 51%).

$\nu_{\text{max}}/\text{cm}^{-1}$  2955, 2929, 2909, 2868, 1455, 1440, 1382, 1361, 1237, 1225, 1213, 1142, 947, 876.

$\delta_{\text{H}}$  (300 MHz,  $\text{CDCl}_3$ ) 7.18–7.15 (1H, m, Ar-H), 7.13 (1H, dd,  $J$  2.5, 1.0 Hz, Ar-H), 3.03–2.89 (1H, m, CH), 1.82 (1H, dd,  $J$  13.3, 6.1 Hz, CHH), 1.55 (1H, app. t,  $J$  13.3 Hz, CHH), 1.44 (3H, s, CH<sub>3</sub>), 1.39 (9H, s, C(CH<sub>3</sub>)<sub>3</sub>), 1.36 (3H, d,  $J$  6.7 Hz, CH(CH<sub>3</sub>)), 1.31 (9H, s, C(CH<sub>3</sub>)<sub>3</sub>), 1.26 (3H, s, CH<sub>3</sub>).

$\delta_{\text{C}}$  (75 MHz,  $\text{CDCl}_3$ ) 149.8 (C), 140.8 (C), 136.7 (C), 125.4 (C), 121.9 (CH), 121.7 (CH), 73.8 (C), 42.9 (CH<sub>2</sub>), 35.2 (C), 34.5 (C), 31.9 (CH<sub>3</sub>), 30.4 (CH<sub>3</sub>), 30.0 (CH<sub>3</sub>), 27.0 (CH), 24.8 (CH<sub>3</sub>), 21.1 (CH<sub>3</sub>).

Found (APCI<sup>+</sup>)  $[\text{M}]^+$  288.2444,  $\text{C}_{20}\text{H}_{32}\text{O}$  requires 288.2448.

elcha088a  
 1H 300.1MHz Job 27481 Coutant Eloi A088A CDCl3 25.0°C  
 6,8-di(tBu)-2,2,4-trimethylchroman?

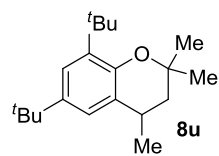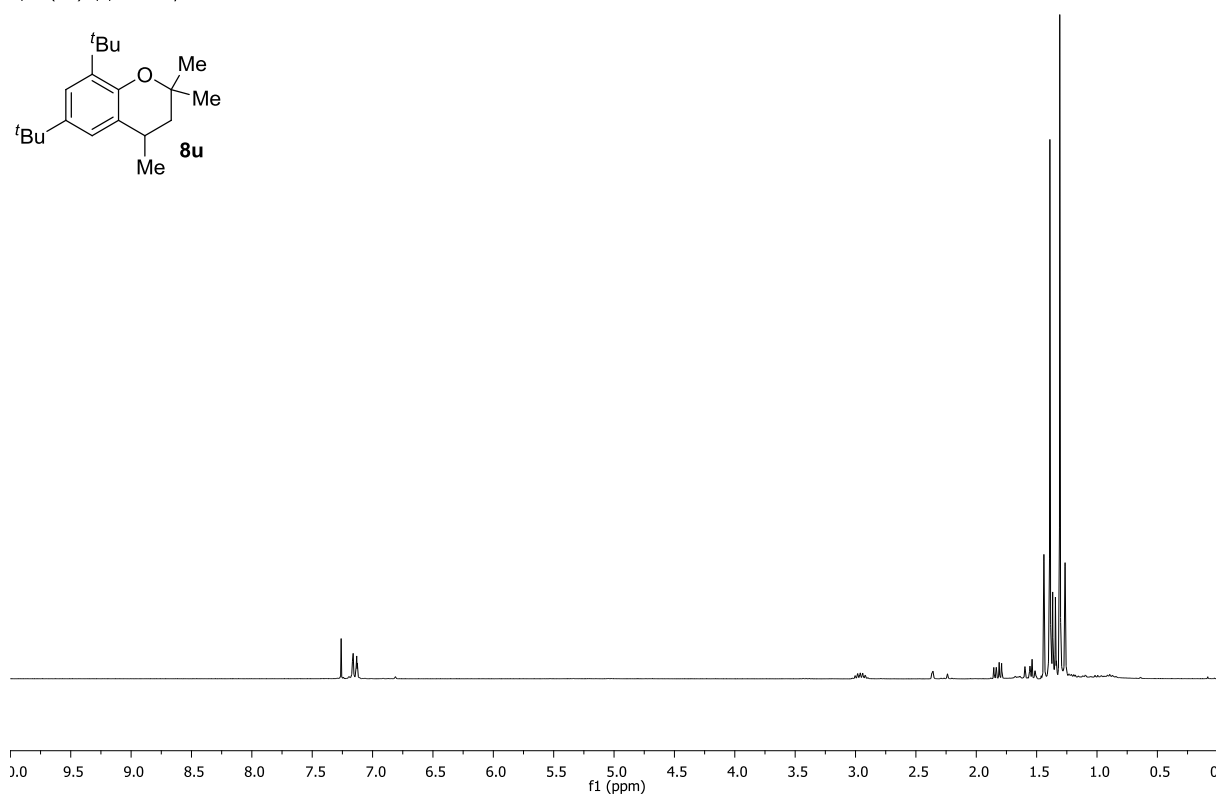

elcca088a  
 13C 75.5MHz Job 27486 Coutant Eloi A088A CDCl3 25.0°C 1 hour 12 min  
 6,8-di(tBu)-2,2,4-trimethylchroman

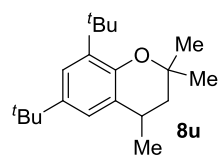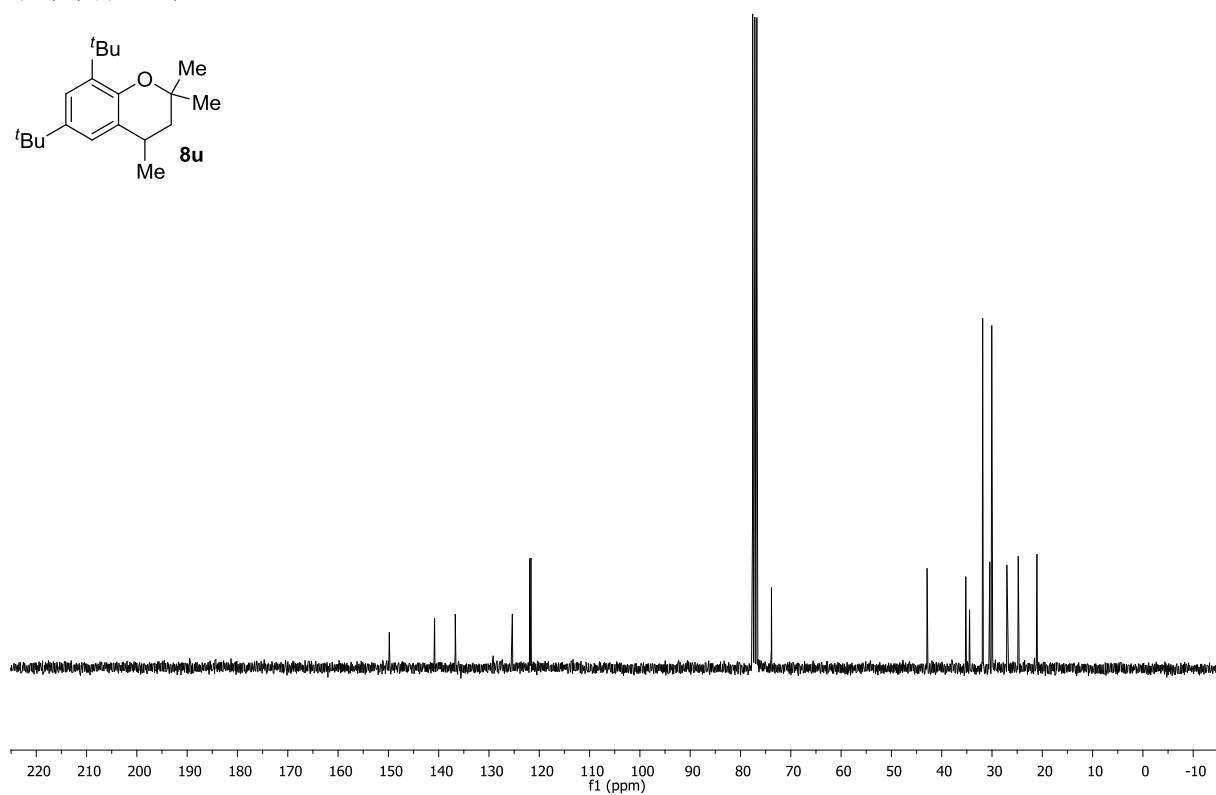



## 2,4-Di-*tert*-butyl-6-cinnamylphenol (**9v**)

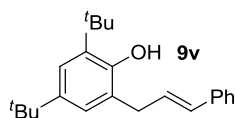

2-Methyl-1-phenylprop-2-en-1-ol (**21**, 15.2 mg, 113  $\mu\text{mol}$ ) and the 2,4-di-*tert*-butylphenol (**5j**, 115 mg, 559  $\mu\text{mol}$ ) were dissolved in toluene (0.23 mL).  $\text{PPh}_3\text{AuNTf}_2$  (as the 2:1 toluene adduct) (4.2 mg, 5.7  $\mu\text{mol}$ ) was added to the resulting solution. The reaction was allowed to stir at 60  $^\circ\text{C}$  for 41 hours. The reaction was then filtered over a plug of silica, using diethyl ether as eluent. The crude product was purified using column chromatography, using a gradient eluent system of 50:1 hexane:diethyl ether to 9:1 hexane:diethyl ether. Product **9v** was obtained as a yellow oil (27.1 mg, 84.0  $\mu\text{mol}$ , 74%).

$\nu_{\text{max}}/\text{cm}^{-1}$  3525, 2955, 2905, 2868, 1479, 1448, 1362, 1215, 1199, 972, 878, 755, 692.

$\delta_{\text{H}}$  (300 MHz,  $\text{CDCl}_3$ ) 7.43–7.25 (6H, m, Ph-H and Ar-H), 7.07 (1H, d,  $J$  2.5 Hz, Ar-H), 6.63 (1H, d,  $J$  15.9 Hz, =CHPh), 6.42 (1H, dt,  $J$  15.9 Hz, 6.5, =CH), 5.13 (1H, s, OH), 3.60 (2H, dd,  $J$  6.5, 1.3 Hz, CH<sub>2</sub>), 1.44 (9H, s, C(CH<sub>3</sub>)<sub>3</sub>), 1.34 (9H, s, C(CH<sub>3</sub>)<sub>3</sub>).

$\delta_{\text{C}}$  (75 MHz,  $\text{CDCl}_3$ ) 151.4 (C), 142.7 (C), 136.8 (C), 136.1 (C), 132.1 (CH), 128.7 (CH), 128.1 (CH), 127.7 (CH), 126.5 (CH), 125.2 (CH), 124.6 (C), 123.0 (CH), 36.1 (CH<sub>2</sub>), 35.0 (C), 34.4 (C), 31.8 (CH<sub>3</sub>), 30.0 (CH<sub>3</sub>).

Found (APCI<sup>+</sup>)  $[\text{M} + \text{NH}_4]^+$  340.2630,  $\text{C}_{23}\text{H}_{34}\text{ON}$  requires 340.2635.

elcha064a  
 1H 300.1MHz Job 26258 Coutant Eloi A064A CDCl3 25.0°C  
 A fraction (3 prod) - 1-phenylprop-2-enol + di(tBu)phenol 60C 2d

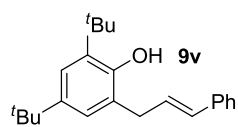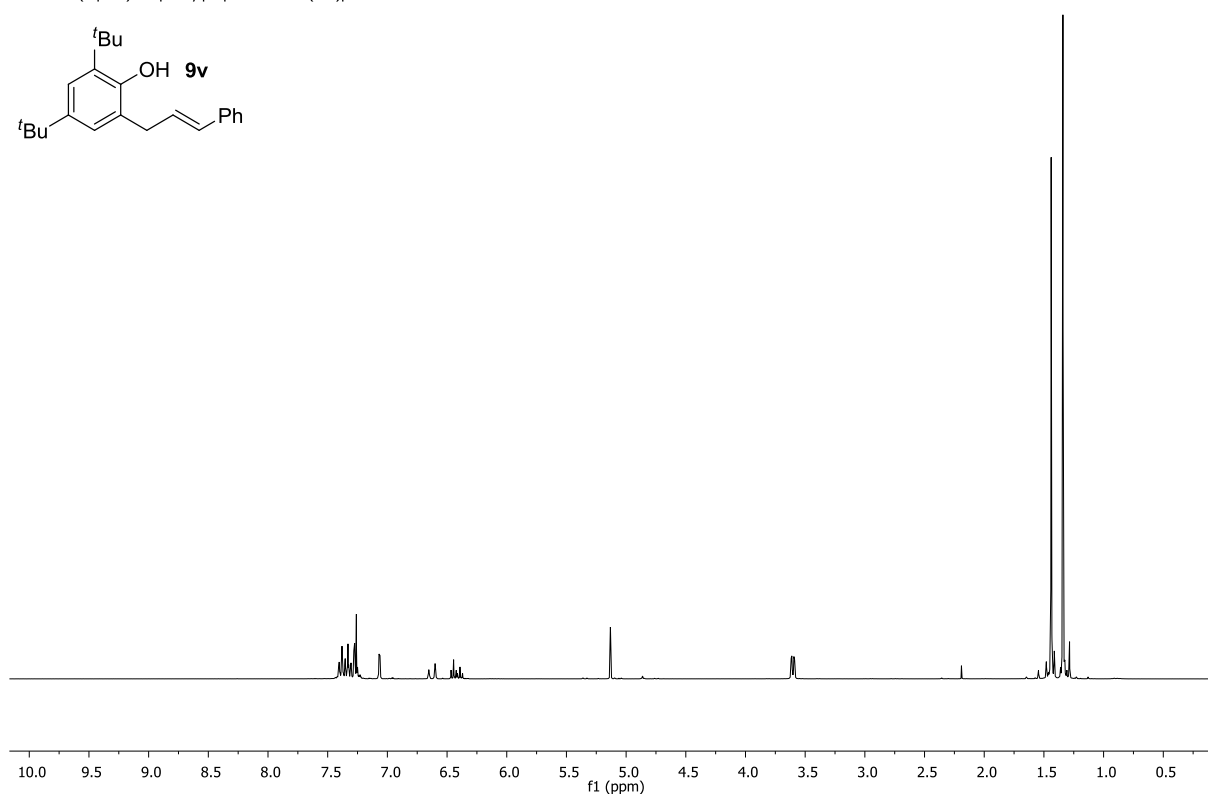

elccb064a  
 13C 75.5MHz Job 26905 Coutant Eloi B064A CDCl3 25.0°C 0 hour 54 min  
 Ph/H AA - FC Sn2' product

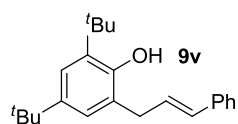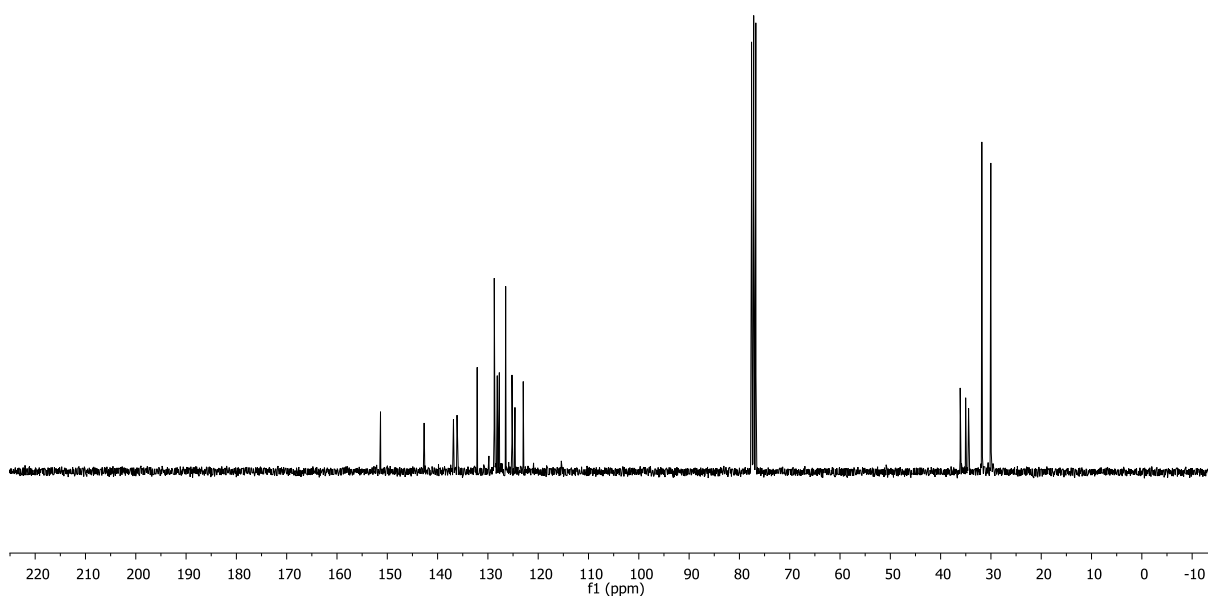

## 6,8-Di-*tert*-butyl-2-phenylchroman (**8v**)

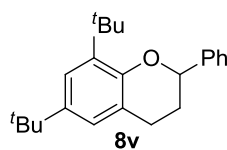

6,8-Di-*tert*-butyl-2-phenylchroman (**20**, 15.1 mg, 112.5  $\mu\text{mol}$ ) and 2,4-di-*tert*-butylphenol (**5j**, 115.4 mg, 559  $\mu\text{mol}$ ) were dissolved in toluene (0.10 mL).  $\text{PPh}_3\text{AuNTf}_2$  (as the 2:1 toluene adduct) (4.1 mg, 5.5  $\mu\text{mol}$ ) was added to the resulting solution.  $\text{HNTf}_2$  (1.6 mg, 5.7  $\mu\text{mol}$ ) was measured out in a glove box, then dissolved in toluene (0.13 mL), and added to the reaction vial. The reaction was allowed to stir at 60 °C for 41 hours. The reaction was then filtered through a plug of silica, using diethyl ether as the eluent. The crude mixture was purified using column chromatography, using neat hexane. The isolated material was impure, so a plug of silica was used to further purify the product. The impurity was washed off in neat hexane, and the desired product was obtained after an ether wash. Product **8v** was obtained as a colourless oil (18.7 mg, 58.0  $\mu\text{mol}$ , 52%).

$\nu_{\text{max}}/\text{cm}^{-1}$  2952, 2867, 1496, 1476, 1444, 1361, 1231, 1127, 877, 752, 697.

$\delta_{\text{H}}$  (300 MHz,  $\text{CDCl}_3$ ) 7.53–7.27 (5H, m,  $\text{C}(\text{C}_6\text{H}_5)$ ), 7.20 (1H, d,  $J$  2.5 Hz, Ar-H), 6.98 (1H, d,  $J$  2.4 Hz, Ar-H), 5.02 (1H, dd,  $J$  10.5, 2.4 Hz, OCH), 3.08 (1H, ddd,  $J$  16.5, 11.8, 6.5 Hz, CCHHCH<sub>2</sub>), 2.85 (1H, ddd,  $J$  16.5, 5.5, 2.6 Hz, CCHHCH<sub>2</sub>), 2.26–1.98 (2H, m, CHCH<sub>2</sub>CH<sub>2</sub>), 1.40 (9H, s,  $\text{C}(\text{CH}_3)_3$ ), 1.32 (9H, s,  $\text{C}(\text{CH}_3)_3$ ).

$\delta_{\text{C}}$  (75 MHz,  $\text{CDCl}_3$ ) 151.8 (C), 142.6 (C), 142.1 (C), 137.2 (C), 128.5 (CH), 127.7 (CH), 126.1 (CH), 124.4 (CH), 122.0 (CH), 121.2 (C), 77.9 (CH), 35.2 (C), 34.4 (C), 31.8 (CH<sub>3</sub>), 30.8 (CH<sub>2</sub>), 30.1 (CH<sub>3</sub>), 26.4 (CH<sub>2</sub>).

Found (APCI<sup>+</sup>)  $[\text{M} - \text{H}]^+$  321.2214,  $\text{C}_{23}\text{H}_{29}\text{O}$  requires 321.2213.

pcyhd7531H 300.1MHz Job 29296 Young Paul C D753 CDCl3 24.9°C  
Purified

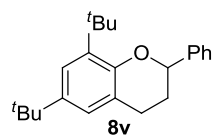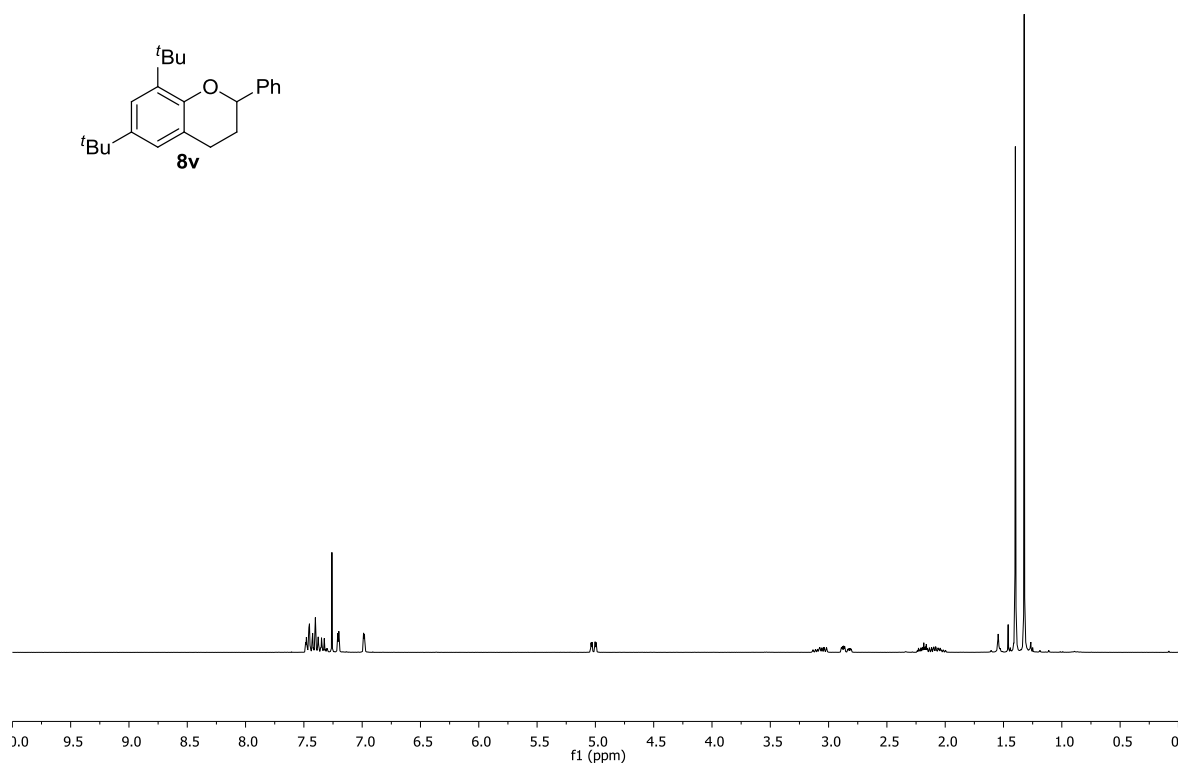

pcycd75313C 75.5MHz Job 29317 Young Paul C D753 CDCl3 25.0°C 2 hours 7 min  
Purified

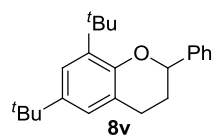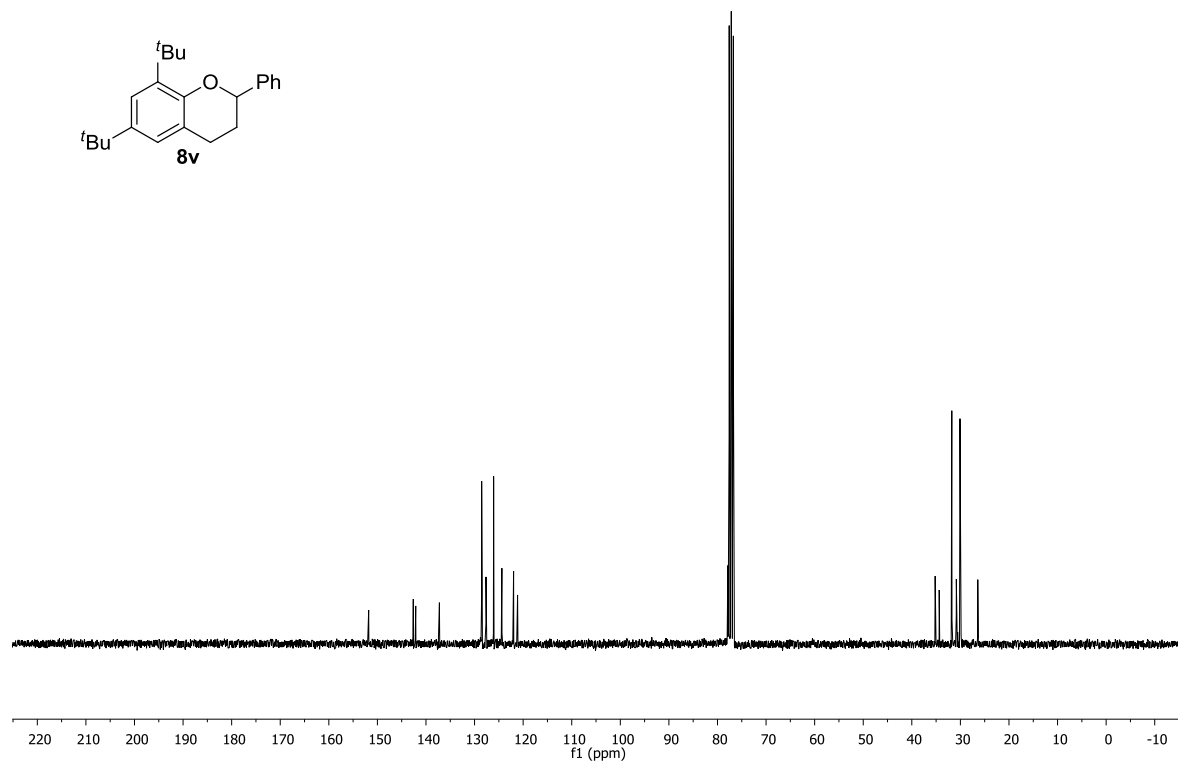

As noted in footnote 77 of the article, a minor rearrangement side product is often observed in 15–25% yields when the allylic alcohol **7** is used as a substrate (noted by the appearance of the distinctive multiplet at ~5.4–5.5 ppm in the <sup>1</sup>H-NMR spectra of the crude mixture). As the desired chroman products **8a–l** were still obtained in good yields, the minor side product was not isolated, except in the case of Entry 3, Table 2 (using phenol **5b**), and appears to be a rearrangement product of **9b** (**SI-1b**).

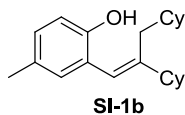

$\nu_{max}/\text{cm}^{-1}$  3410, 2912, 2851, 1508, 1447, 1260, 1202, 1181, 1102, 807.

$\delta_{\text{H}}$  (400 MHz,  $\text{CDCl}_3$ ) 6.90–6.84 (2H, m, Ar-H), 6.66 (1H, d,  $J$  8.0 Hz, Ar-H), 5.46–5.40 (1H, m, =CH), 4.53 (1H, s, OH), 2.53–2.45 (1H, m,  $\text{CH}_2$ ), 2.35–2.26 (1H, m,  $\text{CH}_2$ ), 2.25 (3H, s,  $\text{CH}_3$ ), 2.11–2.01 (2H, m,  $\text{CH}_2$ ), 1.97–0.73 (20H, m, Cy-H).

$\delta_{\text{C}}$  (101 MHz,  $\text{CDCl}_3$ ) 151.3 (C), 139.0 (C), 130.7 (CH), 130.0 (C), 128.6 (C), 127.5 (CH), 123.9 (CH), 115.3 (CH), 53.9 (CH), 40.2 (CH), 32.1 ( $\text{CH}_2$ ), 31.4 ( $\text{CH}_2$ ), 30.2 ( $\text{CH}_2$ ), 28.3 ( $\text{CH}_2$ ), 26.90 ( $\text{CH}_2$ ), 26.86 ( $\text{CH}_2$ ), 26.77 ( $\text{CH}_2$ ), 25.53 ( $\text{CH}_2$ ), 25.46 ( $\text{CH}_2$ ), 23.3 ( $\text{CH}_2$ ), 23.1 ( $\text{CH}_2$ ), 20.7 ( $\text{CH}_3$ ). Found (APCI<sup>+</sup>)  $[\text{M} + \text{H}]^+$  313.2530,  $\text{C}_{22}\text{H}_{33}\text{O}$  requires 313.2526.

elchd023b  
 1H 400.1MHz Job 20038 Coutant Eloi D023B CDCl3 25.0°C  
 \*

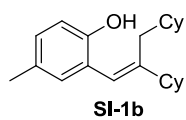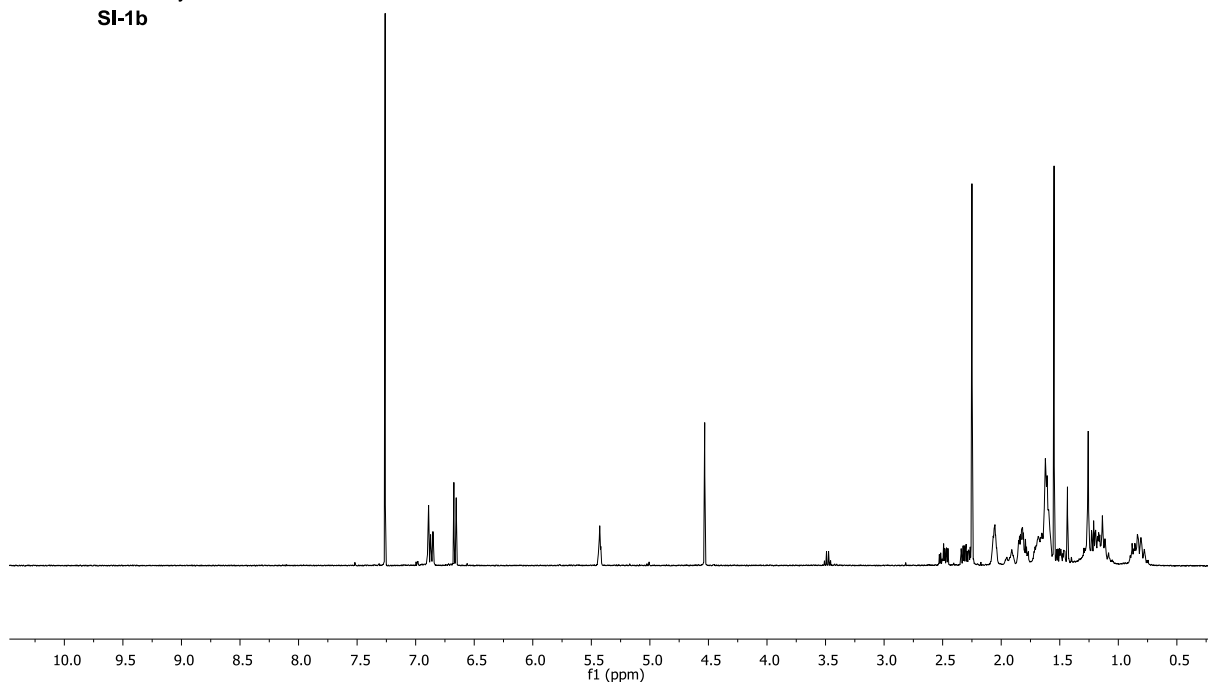

elccd023b  
 13C 100.6MHz Job 20041 Coutant Eloi D023B CDCl3 25.0°C 14 hours 20 min  
 \*

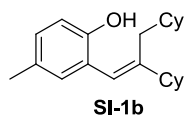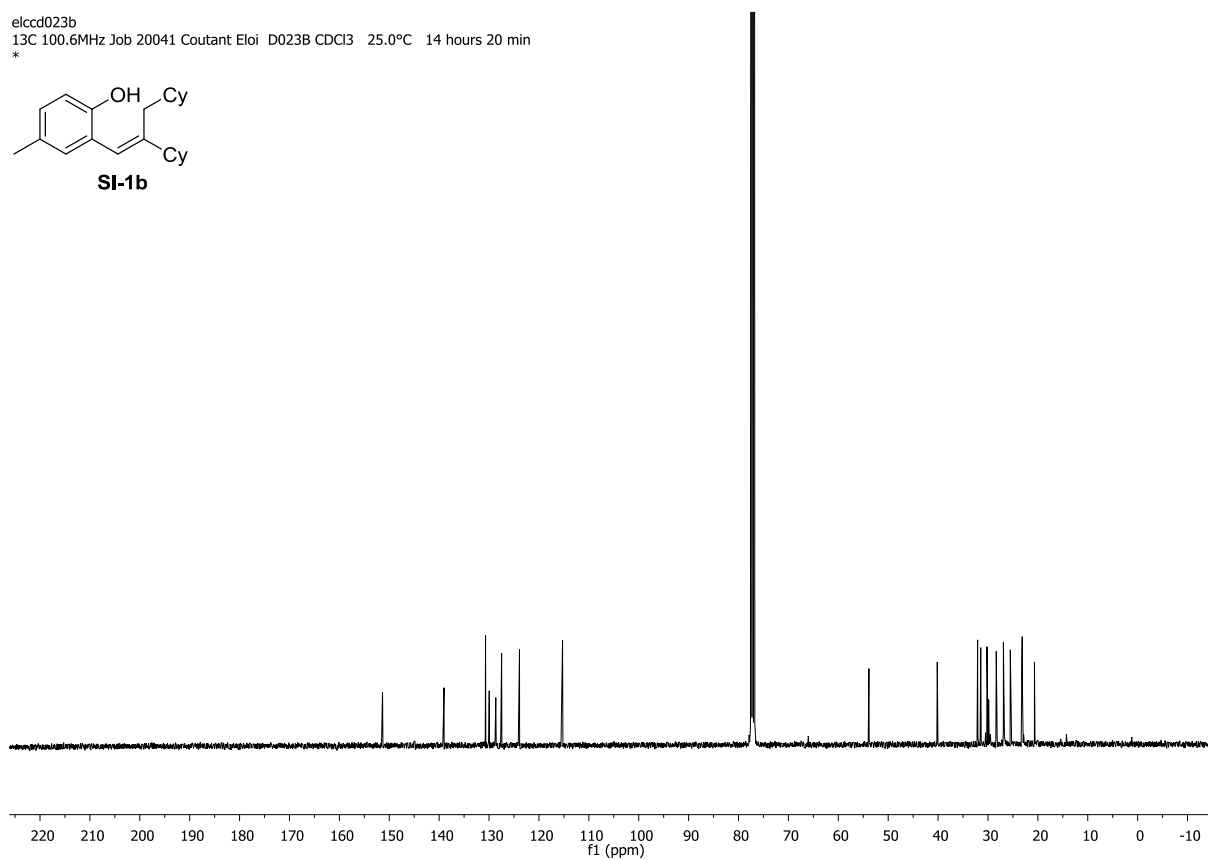

## References

- (1) Morrill, C.; Grubbs, R. H. *J. Am. Chem. Soc.* **2005**, *127*, 2842–2843.
- (2) Young, P. C.; Schopf, N. A.; Lee, A.-L. *Chem. Commun.*, **2013**, *49*, 4262-4264.
- (3) Fernandez-Mateos, A.; Madrazo, S. E.; Teijoin, P. H.; Gonzalez, R. R. *Eur. J. Org. Chem.*, **2010**, *5*, 856-861.
- (4) (a) Masuda, Y.; Hoshi, M.; Arase, A. *Bull Chem. Soc. Jpn.* **1992**, *65*, 3294-3299. (b) Cain, M. E. *J. Chem. Soc.* **1964**, 3532-3535.
